# Supplementary material
Source: PubMed Central journal article supplement (PMC10407959)
Supplement: NIHMS1918906-supplement-SI_file.pdf [file NIHMS1918906-supplement-SI_file.pdf]

## Supporting Information

### Alicyclic Ring Size Variation of 4-Phenyl-2-Naphthoic Acid Derivatives

#### as P2Y<sub>14</sub> Receptor Antagonists

Zhiwei Wen,<sup>†</sup> Asmita Pramanik,<sup>†</sup> Sarah A. Lewicki,<sup>†</sup> Young-Hwan Jung,<sup>†</sup> Zhan-Guo Gao,<sup>†</sup> John C. R. Randle,<sup>¶</sup> Chunxia Cronin,<sup>^</sup> Zhoumou Chen,<sup>‡</sup> Luigino A. Giancotti,<sup>‡</sup> Gregory S. Whitehead,<sup>+</sup> Bruce T. Liang,<sup>^</sup> Sylvie Breton,<sup>x</sup> Daniela Salvemini,<sup>‡</sup> Donald N. Cook,<sup>+</sup> and Kenneth A. Jacobson<sup>†\*</sup>

<sup>†</sup> Molecular Recognition Section, Laboratory of Bioorganic Chemistry, National Institute of Diabetes and Digestive and Kidney Diseases, National Institutes of Health, Bethesda, MD 20892 USA.

<sup>¶</sup> Random Walk Ventures, LLC, 108 Lincoln Street Unit 6B, Boston, MA 02111, USA.

<sup>^</sup> Pat and Jim Calhoun Cardiology Center, University of Connecticut Health Center, Farmington, CT 06030, USA.

<sup>‡</sup> Department of Pharmacology and Physiology and the Henry and Amelia Nasrallah Center for Neuroscience, Saint Louis University School of Medicine, 1402 South Grand Blvd., St. Louis, MO 63104, USA.

<sup>+</sup> Immunity, Inflammation and Disease Laboratory, National Institute of Environmental Health Sciences, National Institutes of Health, Research Triangle Park, NC 27709 USA.

<sup>x</sup> Centre de Recherche du CHU de Québec, Département d'Obstétrique, de Gynécologie et Reproduction, Faculté de Médecine, Université Laval, Laval, Québec, G1V 4G2, Canada.

\* corresponding author, E-mail address: [kennethj@niddk.nih.gov](mailto:kennethj@niddk.nih.gov), Kenneth A. Jacobson, Ph.D., Building 8A, Room B1A-19, 9000 Rockville Pike, Bethesda, MD 20892-0810, Tel. 301-496-9024.

| <u>Contents</u>                                                          | <u>Pages</u> |
|--------------------------------------------------------------------------|--------------|
| Scheme S1 and synthetic methods for <b>4a</b>                            | S2–S3        |
| Fig. S1 and Table S1. hP2Y <sub>14</sub> R binding of selected compounds | S4           |
| Scheme S2 and synthetic methods for JaneliaFluor646 deriv. <b>53</b>     | S5–S7        |
| Flow cytometry results with new fluorescent derivative <b>53</b>         | S8           |

|                                                                          |         |
|--------------------------------------------------------------------------|---------|
| Table S2, Figs. S3–S4. Determination of lipophilicity by HPLC            | S9–S10  |
| Off-target activities                                                    | S11     |
| Table S3. Experimental ADMET properties, hERG assay procedure            | S12–S14 |
| Tables S4-5 and Figs. S5-6. Additional pharmacokinetic studies: prodrugs | S15–S20 |
| Fig. S7. BAL cells in asthma model                                       | S21     |
| Fig. S8. CCI chronic pain model                                          | S22     |
| Fig. S9. Predicted structure of compound <b>15</b>                       | S23     |
| Fig. S10A,B. Mouse ischemia reperfusion results and procedures           | S23-S26 |
| <sup>1</sup> H and <sup>13</sup> C NMR spectra and HPLC purity           | S27–S60 |
| Table S6. Calculated ADMET properties (StarDrop)                         | S61–S65 |
| References                                                               | S66     |

## Chemical Synthesis

Compound 2-phenyl-benzoxazole acetamide (**4a**, Chart 1) was synthesized using a modified reported procedure.<sup>1</sup> briefly, cyclization of 2-amino-4-chlorophenol (**4c**) with *m*-aminobenzoic acid (**4d**) in polyphosphoric acid offered intermediate 3-(5-chlorobenzo[d]oxazol-2-yl)aniline (**4e**), which underwent amidation with 2-(4-(trifluoromethyl)phenyl)acetic acid (**4f**) activated with HATU in the presence of base DIPEA to provide *N*-(3-(5-chlorobenzo[d]oxazol-2-yl)phenyl)-2-(4-(trifluoromethyl)phenyl)acetamide (**4a**). Compound **4a** was confirmed with HRMS and NMR, matching the spectra reported.<sup>1</sup>

**Scheme S1.** Synthesis of new lead, benzoxazoles, as P2Y<sub>14</sub>R antagonists.

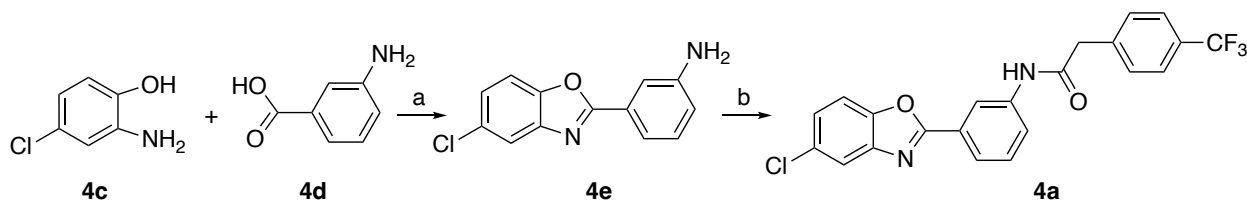

**Reagents and conditions:** (a). polyphosphoric acid, reflux, overnight, 99.6%; (b) 2-(4-(trifluoromethyl)phenyl)acetic acid, HATU, DIPEA, DMF, rt, overnight, 66.7%.

## Synthetic procedures

**3-(5-Chlorobenzo[d]oxazol-2-yl)aniline (**4e**).** A solution of **4c** (287 mg, 2 mmol) and **4d** (274 mg, 2 mmol) in polyphosphoric acid (2 mL) was refluxed at 185 °C in an oil bath overnight. The reaction mixture was neutralized with 6 N NaOH then extracted three times with EtOAc. The

combined organic layer was dried with Na<sub>2</sub>SO<sub>4</sub>. The volatiles were evaporated, and the residue was column chromatographed (hexane/EtOAc, 100:0→60:40) to give **4c** (488 mg, 99.6%): <sup>1</sup>H NMR (400 MHz, CDCl<sub>3</sub>) δ 7.70 (d, *J* = 2.1 Hz, 1H), 7.59 (d, *J* = 7.7 Hz, 1H), 7.53 (t, *J* = 2.0 Hz, 1H), 7.46 (d, *J* = 8.6 Hz, 1H), 7.32 – 7.25 (m, 2H), 6.83 (dd, *J* = 8.2, 2.5 Hz, 1H), 3.82 (s, 2H). HRMS *m/z* [M + H]<sup>+</sup> for C<sub>13</sub>H<sub>10</sub><sup>35</sup>ClN<sub>2</sub>O calculated 245.0482, found 245.0483.

N-(3-(5-Chlorobenzo[d]oxazol-2-yl)phenyl)-2-(4-(trifluoromethyl)phenyl)acetamide (**4a**). Into a solution of **4e** (4.9 mg, 0.02 mmol) and 2-(4-(trifluoromethyl)phenyl)acetic acid (4.1 mg, 0.02 mmol) in DMF (0.5 mL) was added HATU (11.4 mg, 0.03 mmol) and DIPEA (10.4 μL, 7.8 mg, 0.06 mmol). The resulting solution was stirred at rt overnight. The volatiles were removed, and the residue was column chromatographed (hexane/EtOAc, 100:0→60:40). Appropriate fractions were collected and further purified by RP-HPLC (C18, A: ACN, B: H<sub>2</sub>O, 90% → 100% A in 40 min, flow rate = 5 mL/min, *t<sub>R</sub>* = 29 min) to give **4a** as a white powder (5.75 mg, 66.7%): <sup>1</sup>H NMR (400 MHz, DMSO) δ 10.59 (s, 1H), 8.62 (s, 1H), 7.93 (d, *J* = 2.1 Hz, 1H), 7.88 (d, *J* = 7.8 Hz, 1H), 7.84 (d, *J* = 8.7 Hz, 1H), 7.77 (d, *J* = 8.1 Hz, 1H), 7.72 (d, *J* = 8.0 Hz, 2H), 7.59 (d, *J* = 7.7 Hz, 2H), 7.55 (d, *J* = 7.9 Hz, 1H), 7.52 – 7.45 (m, 1H), 3.83 (s, 2H). HRMS *m/z* [M + H]<sup>+</sup> for C<sub>22</sub>H<sub>15</sub><sup>35</sup>ClF<sub>3</sub>N<sub>2</sub>O<sub>2</sub> calculated 431.0774, found 431.0772.

**Figure S1.** Inhibition of specific hP2Y<sub>14</sub>R binding of fluorescent antagonist **52** by selected antagonist derivatives, including 2-phenyl-benzoxazole acetamide (**4a**, Scheme S1). The ratio of total vs. nonspecific binding is ~2. Related to Figure 1.

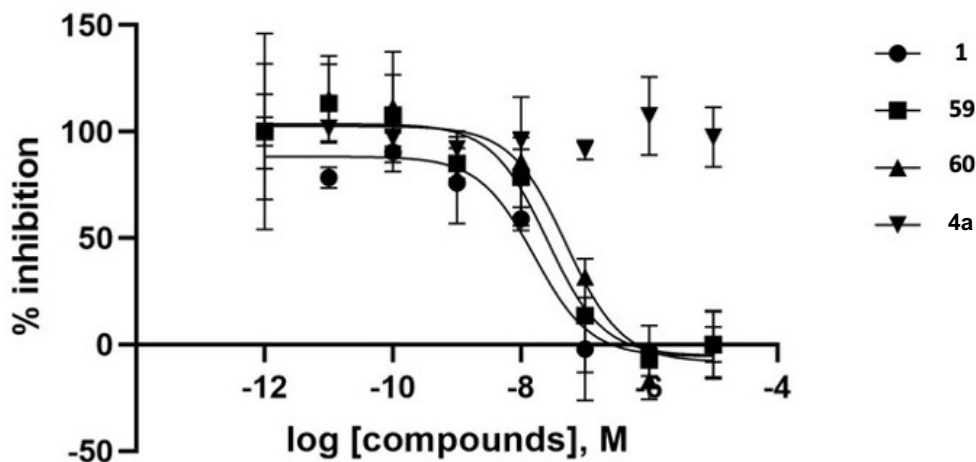

**Table S1.** Affinity of three previously reported P2Y<sub>14</sub>R antagonists compared (in Figure S1 vs. Wen et al.<sup>5</sup>).

| Compound  | K <sub>i</sub> (nM) | K <sub>i</sub> (nM, Wen et al. <sup>a</sup> , compound number) |
|-----------|---------------------|----------------------------------------------------------------|
| <b>1</b>  | 7.1±1.4             | 4.63 ( <b>1</b> )                                              |
| <b>59</b> | 14.3±6.8            | 21.7 ( <b>23</b> )                                             |
| <b>60</b> | 16.8                | 37.3 ( <b>20</b> )                                             |

<sup>a</sup> calculated from IC<sub>50</sub> data in Wen et al., 2022.<sup>5</sup> The IC<sub>50</sub> values were converted to K<sub>i</sub> values by dividing by 1.72, based on the affinity of the fluorescent ligand **52** containing AlexaFluor488 in a binding saturation experiment of 27.8±9.3 nM (see main text). Two analogues, both related structurally to (*S,S,S*)-2-azanorbornane derivative **2b**, were reported earlier (Wen et al., 2022).<sup>5</sup>

**Compound 59:**

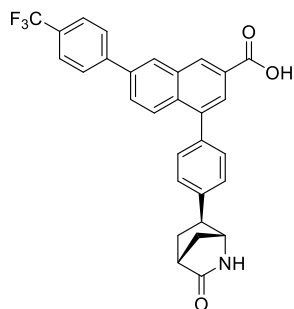

**Compound 60:**

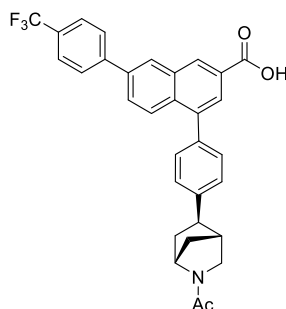

**Scheme S2.** Synthesis of novel fluorescent conjugate **53**, a JaneliaFluor646 conjugate. Related to Figure 1.

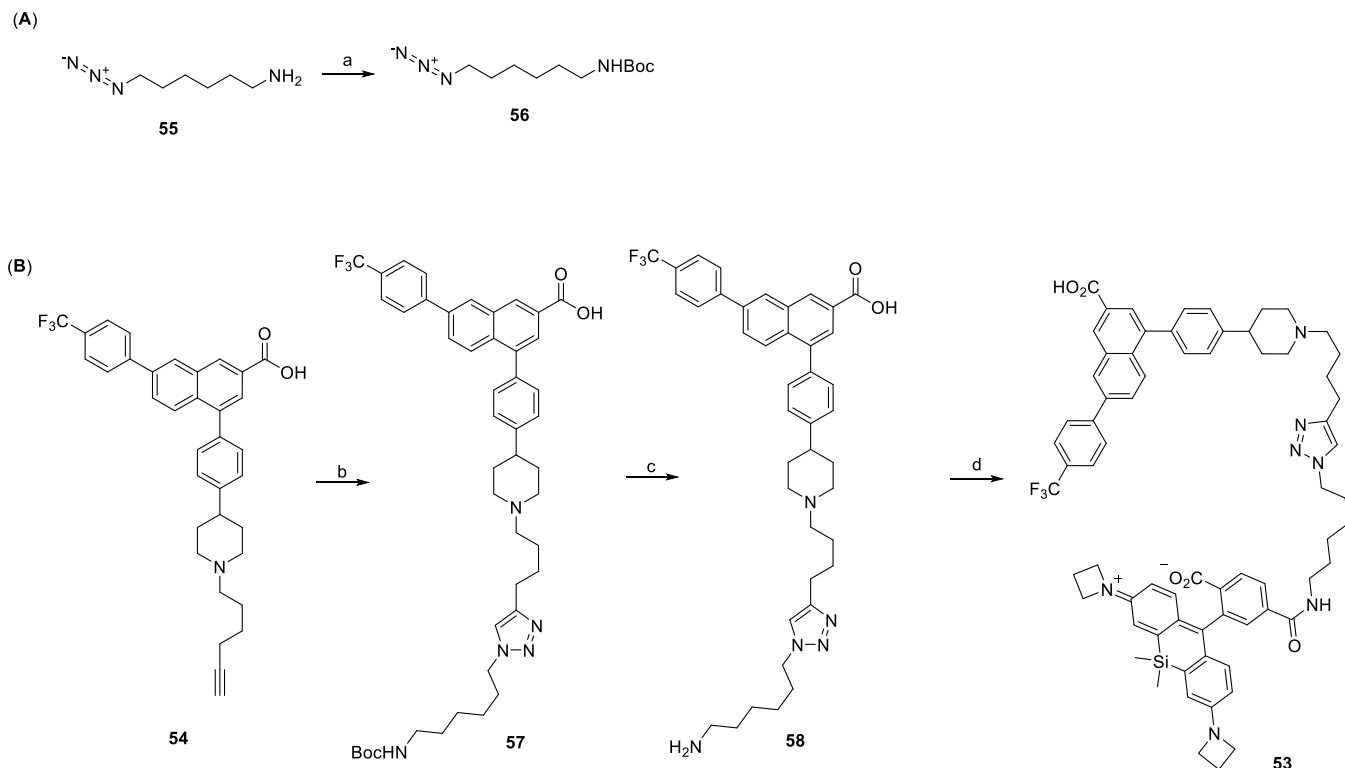

**Reagents and conditions:** (a) Di-*tert*-butyl dicarbonate, DMAP, THF, rt, 3 h, 95%. (b) **55**, sodium ascorbate, CuSO<sub>4</sub>·5H<sub>2</sub>O, *t*BuOH:H<sub>2</sub>O = 4:1, rt, 12 h, 65%; (c) TFA:THF = 2:1, rt, 2 h, 76%; (d) JaneliaFluor646-NHS ester, TEA, DMSO, rt, 12 h, 70%.

*tert*-Butyl (6-azidohexyl)carbamate (**56**). To a solution of 6-azidohexan-1-amine (**55**, 100 mg, 0.703 mmol) in THF were added di-*tert*-butyl dicarbonate (184 mg, 0.843 mmol), and DMAP (17 mg, 0.140 mmol). The reaction mixture was stirred at room temperature for 3 h. After the solvent was evaporated under reduced pressure, the residue was purified by silica gel column chromatography (dichloromethane:methanol=30:1) to afford compound **56** (162 mg, 95%); <sup>1</sup>H NMR (400 MHz, CDCl<sub>3</sub>) δ 3.28 (t, *J* = 6.90 Hz, 2H), 3.15-3.10 (m, 2H), 1.65-1.58 (m, 2H), 1.52-1.50 (m, 2H), 1.46 (s, 9H), 1.42-1.34 (m, 4H).

4-(4-(1-(4-(1-(6-((*tert*-Butoxycarbonyl)amino)hexyl)-1*H*-1,2,3-triazol-4-yl)butyl)piperidin-4-yl)phenyl)-7-(4-(trifluoromethyl)phenyl)-2-naphthoic acid (**57**). To a mixture of compound **54** (40 mg, 0.071 mmol; synthesized according to literature procedures reported<sup>2</sup>) and compound **56**

(26 mg, 0.107 mmol) in *t*BuOH:H<sub>2</sub>O (5 mL, 4:1) were added CuSO<sub>4</sub>·5H<sub>2</sub>O (9.0 mg, 0.035 mmol) and sodium ascorbate (21 mg, 0.107 mmol, freshly prepared 1 M aqueous solution), and then this reaction mixture was stirred at room temperature for 12 h. The reaction mixture was partitioned between ethyl acetate (10 mL) and water (5 mL), and the aqueous layer was extracted with ethyl acetate (10 mL x 2). The combined organic layer was washed brine (5 mL), dried over Na<sub>2</sub>SO<sub>4</sub>, filtered, and evaporated under reduced pressure. The residue was purified by silica gel column chromatography (dichloromethane:methanol=10:1) to afford compound **57** (37 mg, 65%) as a white solid; HPLC purity 99% (R<sub>t</sub> = 19.01 min); <sup>1</sup>H NMR (400 MHz, CD<sub>3</sub>OD) δ 8.68 (s, 1H), 8.39 (s, 1H), 7.98-7.94 (m, 4H), 7.86-7.77 (m, 4H), 7.48-7.42 (m, 4H), 4.38-4.35 (m, 2H), 4.25-4.21 (m, 0.5H), 4.08-4.05 (m, 0.5H), 3.72-3.69 (m, 2H), 3.22-3.13 (m, 4H), 3.01-2.98 (m, 3H), 2.85-2.79 (m, 2H), 2.22-2.19 (m, 2H), 2.11-2.07 (m, 2H), 1.98 (s, 1H), 1.91-1.83 (m, 6H), 1.49 (s, 9H), 1.33-1.32 (m, 4H); MS (ESI, m/z) 798.4 [M + H]<sup>+</sup>; ESI-HRMS calcd. m/z for C<sub>46</sub>H<sub>55</sub>N<sub>5</sub>O<sub>4</sub>F<sub>3</sub>, 798.4206, found 798.4198 [M + H]<sup>+</sup>.

4-(4-(1-(4-(1-(6-Aminohexyl)-1*H*-1,2,3-triazol-4-yl)butyl)piperidin-4-yl)phenyl)-7-(4-(trifluoromethyl)phenyl)-2-naphthoic acid (**58**). A solution of compound **57** (24 mg, 0.030 mmol) in trifluoroacetic acid:tetrahydrofuran (3 mL, 2:1) was stirred at room temperature for 2 h. The solvent was evaporated with toluene under reduced pressure. The residue was purified by semipreparative HPLC (10 mM triethylammonium acetate buffer:acetonitrile = 50:50 to 20:80 in 40 min) to afford the compound **58** (37 mg, 76%) as a white solid. HPLC purity 99% (R<sub>t</sub> = 14.85 min); <sup>1</sup>H NMR (400 MHz, DMSO-*d*<sub>6</sub>) δ 8.53 (s, 1H), 8.45 (s, 1H), 8.04 (d, *J* = 8.00 Hz, 2H), 7.96-7.82 (m, 6H), 7.42-7.37 (m, 4H), 4.27 (t, *J* = 7.10 Hz, 2H), 2.92 (d, *J* = 10.10 Hz, 2H), 2.72-2.68 (m, 1H), 2.60 (t, *J* = 7.20 Hz, 2H), 2.29 (t, *J* = 7.10 Hz, 2H), 1.98-1.93 (m, 2H), 1.89 (s, 2H), 1.79-1.73 (m, 4H), 1.70-1.66 (m, 1H), 1.61-1.57 (m, 2H), 1.49-1.43 (m, 4H), 1.34-1.29 (m, 2H), 1.25-1.20 (m, 3H); MS (ESI, m/z) 698.4 [M + H]<sup>+</sup>; ESI-HRMS calcd. m/z for C<sub>41</sub>H<sub>47</sub>N<sub>5</sub>O<sub>2</sub>F<sub>3</sub> 698.3682, found 698.3674 [M + H]<sup>+</sup>.

2-(3-(Azetidini-1-ylidene)-7-(azetidini-1-yl)-5,5-dimethyl-3,5-dihydrodibenzo[*b,e*]silin-10-yl)-4-(((6-(4-(4-(4-(4-(3-carboxy-6-(4-(trifluoromethyl)phenyl)naphthalen-1-yl)phenyl)piperidin-1-yl)butyl)-1*H*-1,2,3-triazol-1-yl)hexyl)carbamoyle)benzoate (**53**). A mixture of compound **58** (0.88 mg, 0.001 mmol) and TEA (0.2 μL, 0.001 mmol) in anhydrous DMSO (100 μL) was added to JaneliaFluor646-NHS ester (0.5 mg, 0.842 μmol, Tocris, Bristol, UK) under nitrogen

atmosphere and stirred at room temperature for 12 h. The product was purified immediately by semipreparative HPLC (0.1% formic acid:acetonitrile = 50:50 to 20:80 in 40 min) to afford compound **53** (1.0 mg, 70%) as a blue solid. HPLC purity 99% ( $R_t = 15.50$  min);  $^1\text{H}$  NMR (400 MHz,  $\text{CD}_3\text{OD}$ )  $\delta$  8.74 (s, 1H), 8.42 (s, 1H), 8.25-8.23 (m, 1H), 8.08-8.06 (m, 1H), 7.99-7.95 (m, 4H), 7.91-7.89 (m, 1H), 7.80-7.78 (m, 4H), 7.67-7.63 (m, 1H), 7.50-7.43 (m, 4H), 6.85-6.82 (m, 3H), 6.28-6.26 (m, 2H), 4.38 (t,  $J = 6.80$  Hz, 2H), 4.26-4.19 (m, 6H), 3.73-3.70 (m, 2H), 3.23-3.12 (m, 4H), 3.04-2.98 (m, 2H), 2.84-2.78 (m, 2H), 2.65 (s, 2H), 2.50-2.46 (m, 4H), 2.24-2.21 (m, 2H), 2.10-2.03 (m, 3H), 1.93-1.90 (m, 2H), 1.62-1.59 (m, 3H), 1.41-1.28 (m, 7H), 0.55 (s, 3H), 0.50 (s, 3H); MS (ESI,  $m/z$ ) 1176.5  $[\text{M} + \text{H}]^+$ ; ESI-HRMS calcd.  $m/z$  for  $\text{C}_{70}\text{H}_{73}\text{N}_7\text{O}_5\text{F}_3^{28}\text{Si}$  1176.5395, found 1176.5406  $[\text{M} + \text{H}]^+$ .

### Pharmacological characterization of JF646 conjugate **53**

The fluorescent conjugate **53** (structure shown in Figure 1) did not demonstrate specific binding in whole CHO cells expressing the hP2Y<sub>14</sub>R within a range of final concentrations of **53** of 2, 100, 500 and 20,000 nM, compared to a concentration of **52** of 20 nM. At the highest concentration used, there was no inhibition of binding by **1**.

**Figure S2.** Affinity measurement of JaneliaFluor646 conjugate **53** using the standard AlexFluor488 tracer **52**. At 1  $\mu$ M **53** there was no inhibition of P2Y<sub>14</sub>R binding.

Compound **53**, inhibition of binding of fluorescent tracer **52**  
in hP2Y<sub>14</sub>R-expressing CHO cells (flow cytometry)

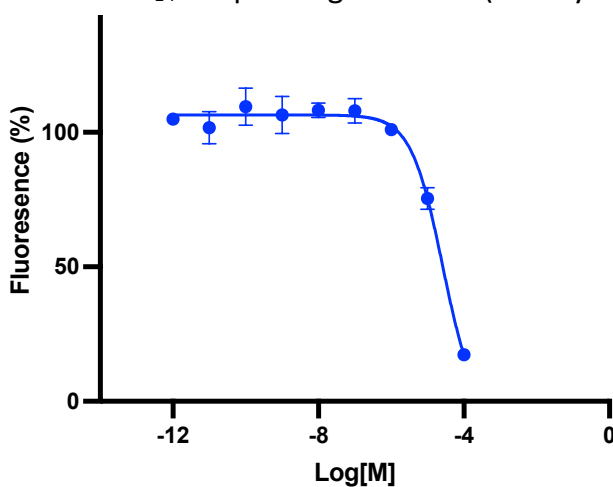

The concentration range of **53** was 1  $\mu$ M – 100  $\mu$ M.  
The IC<sub>50</sub> value is 25.9  $\mu$ M (n=1).



**Table S2.** Determination of lipophilicity by HPLC retention time. Standards with reported Log  $D_{7.4}$  values for calibration of Log  $D_{7.4}$  with retention factor  $k$ .<sup>3</sup> Standards related to lipophilicity data in Table 1.

| Standards    | Log $D_{7.4}$ <sup>a</sup> | $k \pm$ SEM     |
|--------------|----------------------------|-----------------|
| sulpiride    | -1.15                      | $1.76 \pm 0$    |
| metoprolol   | -0.06                      | $2.52 \pm 0$    |
| labetolol    | 1.07                       | $2.88 \pm 0$    |
| diltiazem    | 2.7                        | $4.00 \pm 0.01$ |
| triphenylene | 5.49                       | $5.39 \pm 0.01$ |

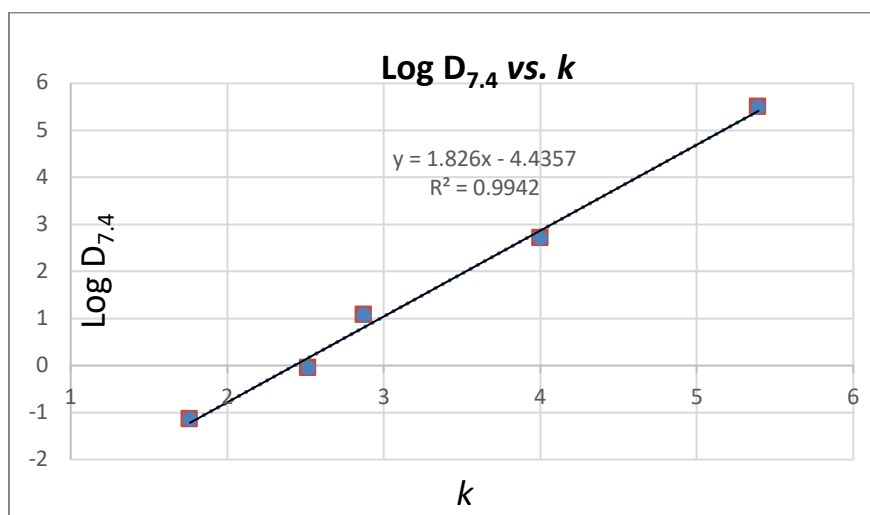

**Figure S3.** Calibration line Log  $D_{7.4}$  vs.  $k$  using five standards listed in Table S2 for calculating HPLC-based Log  $D_{7.4}$  of modified piperidine analogues of **1**.

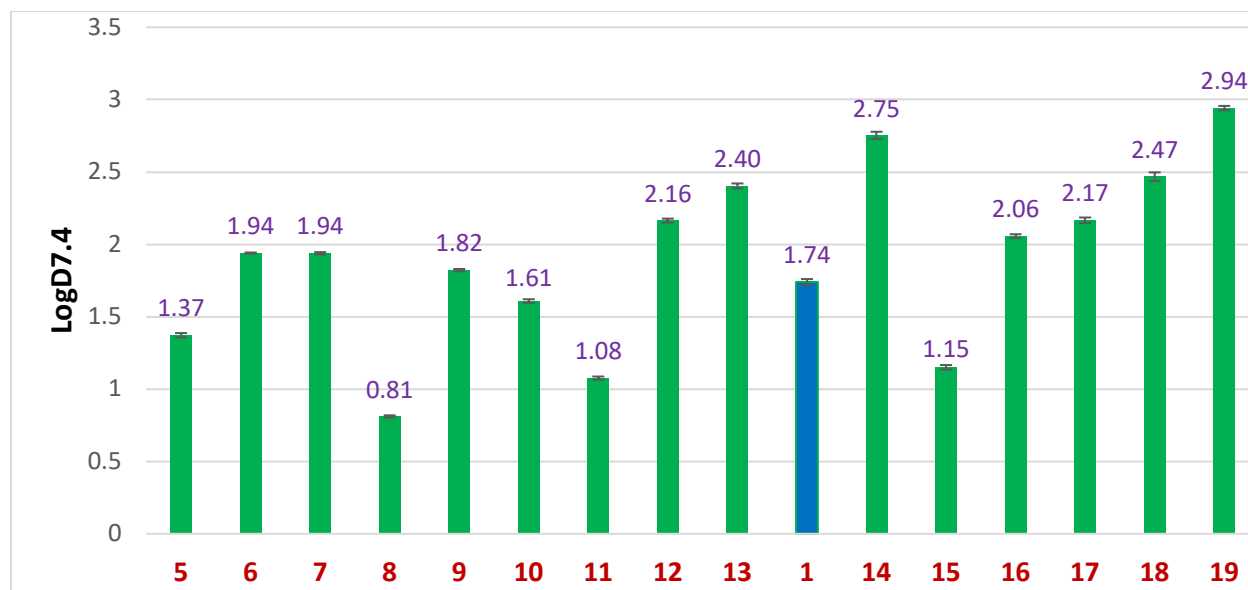

**Figure S4.** Lipophilicities as Log D<sub>7.4</sub> of modified piperidine analogues of piperidine derivative **1**, determined based on their HPLC retention time in comparison to five standard compounds (Table S2). Related to lipophilicity data in Table 1.

## Binding affinities determined for off-target interactions

### Determined by the the Psychoactive Drug Screening Program (PDSP)

We thank Dr. Bryan L. Roth (Univ. North Carolina at Chapel Hill) and National Institute of Mental Health's Psychoactive Drug Screening Program (Contract # HHSN-271-2008-00025-C) for screening data.<sup>4</sup>

Procedures: <https://pdsp.unc.edu/pdspweb/content/UNC-CH%20Protocol%20Book.pdf>

Unless noted in the text, no significant interactions (<50% inhibition at 10  $\mu$ M) for any of the antagonists were found at the following sites (human unless noted): 5HT<sub>1A</sub>, 5HT<sub>1B</sub>, 5HT<sub>1D</sub>, 5HT<sub>1E</sub>, 5HT<sub>2A</sub>, 5HT<sub>2B</sub>, 5HT<sub>2C</sub>, 5HT<sub>3</sub>, 5HT<sub>5A</sub>, 5HT<sub>6</sub>, 5HT<sub>7</sub>,  $\alpha_{1A}$ ,  $\alpha_{1B}$ ,  $\alpha_{1D}$ ,  $\alpha_{2A}$ ,  $\alpha_{2B}$ ,  $\alpha_{2C}$ ,  $\beta_1$ ,  $\beta_2$ ,  $\beta_3$ , BZP rat brain site, D<sub>1</sub>, D<sub>2</sub>, D<sub>3</sub>, D<sub>4</sub>, D<sub>5</sub>, GABA<sub>A</sub>, H<sub>1</sub>, H<sub>2</sub>, H<sub>3</sub>, H<sub>4</sub>, M<sub>1</sub>, M<sub>2</sub>, M<sub>3</sub>, M<sub>4</sub>, M<sub>5</sub>,  $\delta$ -opioid receptor (DOR),  $\kappa$ -opioid receptor (KOR),  $\mu$ -opioid receptor (MOR),  $\sigma_1$ ,  $\sigma_2$ , DAT, NET, SERT. K<sub>i</sub> values in  $\mu$ M, or % inhibition at 10  $\mu$ M, are given.

**Compound**, PDSP number, MRS number, K<sub>i</sub> value, (mean $\pm$ SEM,  $\mu$ M)

**7**, 60211, MRS4821: D<sub>3</sub>, 0.50 $\pm$ 0.02;  $\sigma_2$ , 2.10 $\pm$ 0.50; M<sub>5</sub>, 5.0;  $\beta_3$ , 8.3; H<sub>1</sub>, 5.5.

**11**, 60212, MRS4822:  $\alpha_{2A}$ , 5.7; 5HT<sub>1B</sub>, 5.35 $\pm$ 1.27; 5HT<sub>5A</sub>, 2.37 $\pm$ 0.43.

**15**, 60215, MRS4833: 5HT<sub>1B</sub>, 6.0 $\pm$ 1.6; M<sub>5</sub>, 6.0.

**16**, 60214, MRS4826: 5HT<sub>1B</sub>, 4.52 $\pm$ 0.17;  $\sigma_1$ , 0.89 $\pm$ 0.39;  $\sigma_2$ , 2.77 $\pm$ 0.31; D<sub>3</sub>, 0.41; M<sub>5</sub>, 6.0; H<sub>1</sub>, 2.84 $\pm$ 0.32.

**17**, 60213, MRS4825: 5HT<sub>5A</sub>, 4.0 $\pm$ 0.1; D<sub>3</sub>, 1.71 $\pm$ 0.53; KOR, 0.46 $\pm$ 0.04;  $\sigma_1$ , 0.84 $\pm$ 0.07;  $\sigma_2$ , 3.89 $\pm$ 0.54; 5HT<sub>1B</sub>, 4.10 $\pm$ 0.08;  $\beta_3$ , 6.6; M<sub>5</sub>, 9.0.

**Table S3A–C.** ADMET properties (for procedures see refs. 5 and 6). These assays were performed by JRF (Jai Research Foundation) India of JRF Global (Gujarat, India).

**Table S3A.** In vivo experimental conditions for in vivo PK determination using male Wistar rats. Related to ADMET data in Table 2.

| Dose (mg/kg, route)        | 0.5 (i.v.)                           | 1 (i.p.)                                | 3 (i.p.) | 10 (i.p.) |
|----------------------------|--------------------------------------|-----------------------------------------|----------|-----------|
| Species of Strain          | Rat and RccHan:WIST                  |                                         |          |           |
| N mice                     | 3                                    | 3                                       | 3        | 3         |
| Feeding Condition          | Fed                                  | Fasting overnight, feed 4 h post-dosing |          |           |
| Dose Volume (mg/kg b. wt.) | 5                                    |                                         |          |           |
| Concentration (mg/mL)      | 0.1                                  | 0.2                                     | 0.6      | 2         |
| Vehicles                   | DMSO: 20% HPBCD (10:90)              | DMSO: Kolliphor EL: PBS (15:15:70)      |          |           |
| Blood Collection Site      | Jugular vein through a catheter      |                                         |          |           |
| Anticoagulant              | Heparin (20 IU/mL)                   |                                         |          |           |
| Time Points (h)            | 0.083, 0.25, 0.5, 1, 2, 4, 8, 12, 24 | 0.25, 0.5, 1, 2, 4, 8, 12, 24           |          |           |

Rats were observed daily, twice, for mortality and morbidity, and once for visible clinical signs throughout the research period. Body weight of rats was recorded on the first day of acclimatization, surgery, randomization, and treatment. Approximately 200  $\mu$ L blood sample was collected from jugular vein of each rat, at every time point. Plasma was collected and frozen immediately at  $-70 \pm 10$  °C. Rats were terminally sacrificed by carbon dioxide asphyxiation after last blood collection (24h).

The plasma samples were analyzed for determination of drug concentration. The pharmacokinetic (PK) analysis of the plasma concentration vs. time was performed using the non-compartmental model of the WinNonlin<sup>®</sup> software (version 8.3).

**Table S3B.** Caco-2 cell permeability results of compound **15**. Related to ADMET data in Table 2.

| Compound Name      | Average Values                   |        |              |                   |                   | Classification |
|--------------------|----------------------------------|--------|--------------|-------------------|-------------------|----------------|
|                    | Papp<br>(10 <sup>6</sup> cm/sec) |        | Efflux Ratio | A to B % Recovery | B to A % Recovery |                |
|                    | A to B                           | B to A |              |                   |                   |                |
| <b>15</b>          | 0.00                             | 0.62   | NC           | 39.0              | 62.6              | Low            |
| <b>Digoxin</b>     | 0.28                             | 14.4   | 51.8         | 84.4              | 84.6              | Low            |
| <b>Propranolol</b> | 15.0                             | 18.0   | 1.20         | 61.9              | 85.5              | High           |
| <b>Atenolol</b>    | 1.33                             | 0.73   | 0.55         | 91.1              | 88.0              | Low            |

**hERG assay procedure.** The assay used HEK-293 cells stably transfected with the hERG potassium channel. A<sub>3</sub>AR PAM concentrations were prepared using serial half-log dilutions, starting at 30 μM. Compounds were incubated with the hERG-expressing cells for 2 h. Binding to the hERG ion channel were identified their ability to displace the tracer (Predictor™ hERG Tracer Red), resulting in a lower fluorescence polarization using a TAMRA fluorescent polarization filter. Related to ADMET data in Table 2.

**Tables S3C and 3D.** In vivo pharmacokinetic parameters of compounds **2b** and **15** in male Wistar rats. Related to ADMET data in Figure 2.

**Table S3C.** In vivo PK of compound **2b**, as reported in Wen et al.<sup>5</sup>

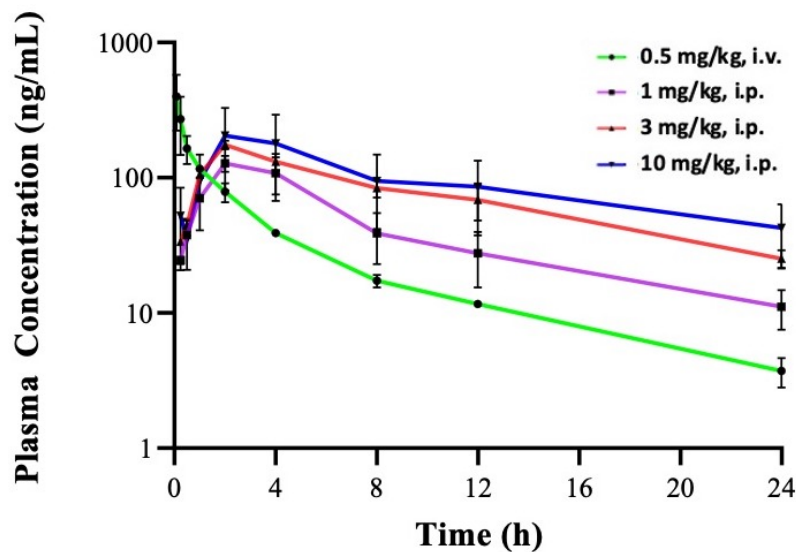

| Dose (Route)     | C <sub>max</sub> (ng/mL) | T <sub>max</sub> (h) | AUC <sub>0-last</sub> (h*ng/mL) | AUC <sub>0-∞</sub> (h*ng/mL) | T <sub>1/2</sub> (h) | MRT <sub>last</sub> (h) | V <sub>d</sub> (mL/kg) | k <sub>el</sub> (1/h) | F (%) | Cl (mL/h/kg) |
|------------------|--------------------------|----------------------|---------------------------------|------------------------------|----------------------|-------------------------|------------------------|-----------------------|-------|--------------|
| 0.5 mg/kg (i.v.) | 400                      | 0.083                | 696                             | 734                          | 7.24                 | 4.38                    | 7110                   | 0.096                 | 100   | 681          |
| 1 mg/kg (p.o.)   | 128                      | 2.000                | 1030                            | 1180                         | 8.94                 | 7.01                    | 11,000                 | 0.078                 | 74.2  | 850          |
| 3 mg/kg (p.o.)   | 175                      | 2.000                | 1800                            | 2110                         | 8.61                 | 8.40                    | 17,700                 | 0.081                 | 43.1  | 1420         |
| 10 mg/kg (p.o.)  | 204                      | 2.000                | 2260                            | 3080                         | 13.3                 | 8.94                    | 62,300                 | 0.052                 | 16.1  | 3250         |

ND, not determined.

**Table S3D.** In vivo PK of compound **15** (a comparable graph is in the main text Figure 2).

| Dose (Route)     | C <sub>max</sub> (ng/mL) | T <sub>max</sub> (h) | AUC <sub>0-last</sub> (h*ng/mL) | AUC <sub>0-∞</sub> (h*ng/mL) | T <sub>1/2</sub> (h) | MRT <sub>last</sub> (h) | V <sub>d</sub> (mL/kg) | k <sub>el</sub> (1/h) | F (%) | Cl (mL/h/kg) |
|------------------|--------------------------|----------------------|---------------------------------|------------------------------|----------------------|-------------------------|------------------------|-----------------------|-------|--------------|
| 0.5 mg/kg (i.v.) | 867                      | 0.083                | 631                             | 635                          | 2.36                 | 0.976                   | 2680                   | 0.294                 | 100   | 788          |
| 1 mg/kg (p.o.)   | 250                      | 2.00                 | 1490                            | 1500                         | 3.01                 | 4.72                    | 2890                   | 0.230                 | 118   | 666          |
| 3 mg/kg (p.o.)   | 651                      | 2.00                 | 4310                            | 4380                         | 4.32                 | 5.54                    | 4270                   | 0.161                 | 114   | 685          |
| 10 mg/kg (p.o.)  | 2020                     | 4.00                 | 14,400                          | 14,600                       | 4.15                 | 4.97                    | 4090                   | 0.167                 | 114   | 685          |

**Table S4.** Pharmacokinetic study of mono-ester prodrugs and active products administered subcutaneously (s.c.) in female CD1 mice. The product (active drug) derived from **63** is the 2-azanorbornyl derivative **2b**. The stability of **63** was also studied in plasma, in comparison to the corresponding mono-ester of active drug **1** was studied (structure below, obtained from Axon Medchem LLC, Reston, VA, <https://www.axonmedchem.com/>, product 1958). The study was performed by Paraza Pharma, Inc., 7171 Frederick Banting, Montréal, Canada H4S 1Z9 (C064-011\_PS-2021-012).

**Table S4A.** Calculated in vitro half-life of ester prodrug of active drug **1** and prodrug **63** (both monoesters). Monoester **63** is a prodrug of **2b**. Related to structures shown in Table 1.

Calculated half-life ( $t_{1/2}$ ) following a 120 min incubation (controls) or 240 min (prodrugs) in human or mouse plasma

| Compound           | Species | $t_{1/2}$ (min) |        |        |
|--------------------|---------|-----------------|--------|--------|
|                    |         | Rep 1           | Rep 2  | Mean   |
| Ester prodrug of 1 | Human   | >720.0          | >720.0 | >720.0 |
| Compound 63        |         | >720.0          | >720.0 | >720.0 |
| Beclomethasone     |         | 324.1           | 272.4  | 298.3  |
| Proprantheline     |         | 11.8            | 12.8   | 12.3   |
| Ester prodrug of 1 | Mouse   | 1.8             | 1.2    | 1.5    |
| Compound 63        |         | 2.0             | 1.2    | 1.6    |
| Beclomethasone     |         | 1.3             | 1.5    | 1.4    |
| Proprantheline     |         | 36.7            | 39.8   | 38.3   |

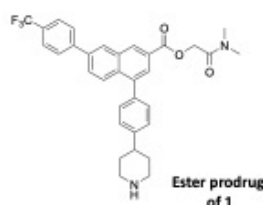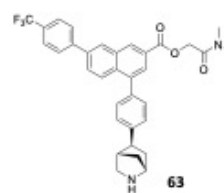

**Plasma Stability Assay:** Prodrugs and assay controls were incubated at 1  $\mu$ M in human and mouse plasma (BioIVT, Westbury, NY, USA) at 37°C for a total of 240 min for the prodrugs and 120 min for controls. The final organic percentage in each incubation was 0.5% DMSO. For controls and prodrugs, drug stability was assessed by quenching the reaction 4:1 with ice-cold stop solution at the required 10, 30, 60 and 120-min timepoints (control compounds). For the prodrugs, the incubation time points were 10, 30, 90 and 240 min. The 0-min samples were prepared by quenching the plasma prior to spiking the test article or control drug. Resulting supernatants were further diluted 1:1 with 0.1% formic acid in water (controls) or a solution of 1:1 water/acetonitrile (prodrugs). The conversion of prodrugs to their corresponding active metabolite was assessed by quenching the plasma prior to spiking the active metabolite. The

percent of metabolite formed was determined based on the pre-quenched plasma sample spiked at a final concentration of 1 $\mu$ M. Samples were centrifuged and further diluted with a solution of 1:1 water/acetonitrile. Samples were analyzed by LC-MS/MS, and calculations for percentage of parent remaining and % metabolite formed calculated using Excel.

Samples were analyzed by LC-MS/MS using a CTC PAL autosampler, Thermo Accela UPL Canda Thermo Quantum triple quadrupole mass spectrometer. Compounds and internal standard were monitored using positive or negative mode electrospray ionization in single reaction monitoring (SRM) mode. The analytes were injected onto a C18 column and chromatographed using a reverse phase gradient with 0.1% formic acid in water and 0.1% formic acid in methanol. Peak integrations were performed using ThermoXcalibur (v2.4) software.

**Table S4B.** Plasma concentrations of active drug **2b** following administration of prodrug **63**. **63** is a monoester prodrug of **2b**. Related to structures shown in Table 1.

Plasma concentration (ng/mL) of **2b** following a single SC administration of **63** at 10 mg/kg, s.c., to female CD1 mice

| Time (h)                            | Animal ID |         |        | Mean (ng/mL) | SD (ng/mL) | %CV  |
|-------------------------------------|-----------|---------|--------|--------------|------------|------|
|                                     | A         | B       | C      |              |            |      |
| 0.25                                | 120.0     | 301.3   | 189.7  | 203.7        | 91.4       | 0.45 |
| 0.5                                 | 312.0     | 695.8   | 360.9  | 456.2        | 208.9      | 0.46 |
| 1                                   | 962.5     | 1374.9  | 826.5  | 1054.6       | 285.6      | 0.27 |
| 2                                   | 2118.3    | 2277.0  | 1562.7 | 1986.0       | 375.1      | 0.19 |
| 4                                   | 2295.2    | 2142.9  | 1407.6 | 1948.5       | 474.6      | 0.24 |
| 8                                   | 1035.9    | 646.6   | 403.8  | 695.4        | 318.9      | 0.46 |
| 24                                  | 37.9      | NQ      | NQ     | 37.9         | -          | -    |
| <b>C<sub>max</sub> (ng/mL)</b>      | 2295.2    | 2277.0  | 1562.7 | 2045.0       | 417.8      | 0.20 |
| <b>t<sub>max</sub> (h)</b>          | 4.00      | 2.00    | 2.00   | 2.67         | 1.15       | 0.43 |
| <b>t<sub>1/2</sub> sc (h)</b>       | 3.35*     | 2.31*   | 2.22*  | 2.63*        | 0.63       | 0.24 |
| <b>AUC<sub>last</sub> (ng/mL*h)</b> | 21594.1   | 12504.7 | 8177.1 | 14092.0      | 6847.9     | 0.49 |
| <b>AUC<sub>inf</sub> (ng/mL*h)</b>  | 21777.6   | 14663.1 | 9470.6 | 15303.7      | 6178.5     | 0.40 |
| <b>% Extrapolation</b>              | 0.84      | 14.7    | 13.7   | 9.74         | 7.72       | 0.79 |
| <b>MRT sc (h)</b>                   | 5.98      | 4.67    | 4.56   | 5.07         | 0.78       | 0.15 |

Limit of quantification (LOQ: 25.0 ng/mL)

Data points highlighted in blue were used to estimate AUC<sub>inf</sub>

\* Interpret t<sub>1/2</sub> values with caution as only 2 points could be captured in the terminal phase.



**Table S4C.** Recovery of prodrug **63** and active drug **2b** in the urine. **63** is a monoester prodrug of **2b**. Related to structures shown in Table 1.

Amount of Compound **63** excreted unchanged in urine following a subcutaneous administration of **63** (10 mg/kg, s.c. in female CD1 mice)

| Animal ID | Total mouse BW (kg) | Time Interval | Conc. (ng/mL) | Urine sample (mL) | Amount (ng) | Total amount (ng) | %Recovered |
|-----------|---------------------|---------------|---------------|-------------------|-------------|-------------------|------------|
| A,B,C     | 0.0681              | 0-8           | 7.43          | 1.283             | 9.5         | 22.5              | 0.003      |
|           |                     | 8-24h         | 9.67          | 1.345             | 13.0        |                   |            |

Limit of quantification (LOQ: 5.0 ng/mL)

Amount of Compound **2b** excreted unchanged in urine following a subcutaneous administration of **63** (10 mg/kg, s.c. in female CD1 mice)

| Animal ID | Total mouse BW (kg) | Time Interval | Conc. (ng/mL) | Urine sample (mL) | Amount (ng) | Total amount (ng) | CL <sub>renal</sub> (mL/min/kg) |
|-----------|---------------------|---------------|---------------|-------------------|-------------|-------------------|---------------------------------|
| A,B,C     | 0.0681              | 0-8           | 137.71        | 1.283             | 176.7       | 1550.5            | 0.025                           |
|           |                     | 8-24h         | 1021.5        | 1.345             | 1373.9      |                   |                                 |

Limit of quantification (LOQ: 5.0 ng/mL)

CL<sub>renal</sub> = (Total Amounts in ng / Total BW in Kg) / AUCinf ng/mL\*min

**Figure S5.** PK profile of active drug **2b** following prodrug **63** administration. **63** is a monoester prodrug of **2b**. Related to structures shown in Table 1.

Pharmacokinetic profile of **2b** following a single administration of **63** at 10 mg/kg, s.c. to female CD-1 mice.

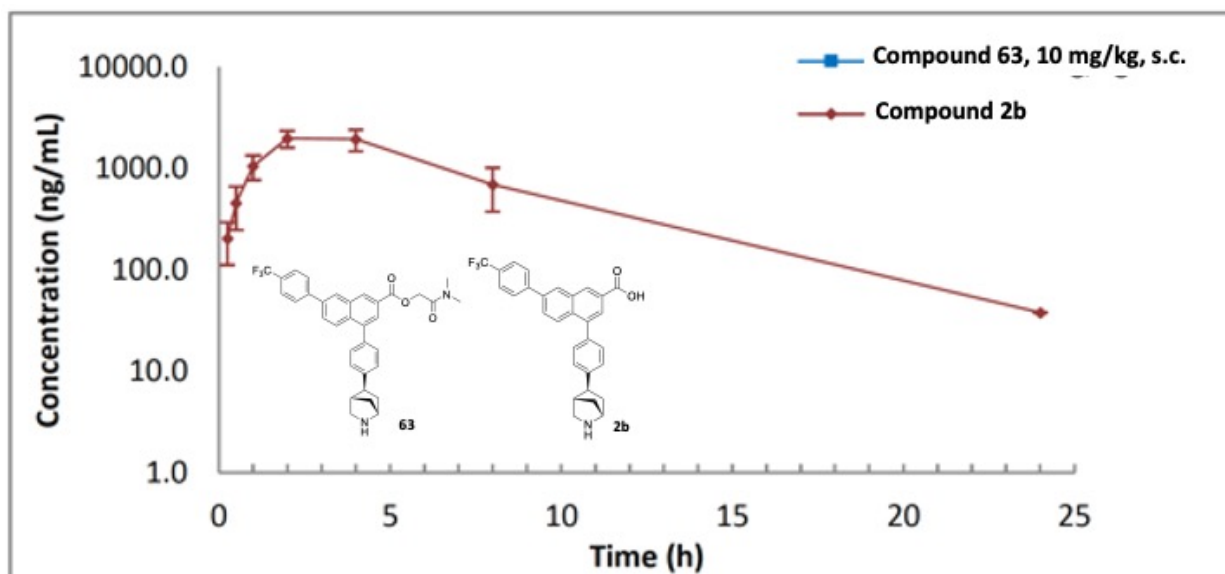

Concentration of **63** was not quantifiable. No peak observed or peak below the limit of quantification (LOQ: 2.5 ng/mL)

Procedure for PK determination: Microsampling with heparinized capillaries was performed using the tail snip method.

A. Samples were thawed at room temperature. B. 20  $\mu\text{L}$  sample + 20  $\mu\text{L}$  of 0.5% formic acid in water + 200  $\mu\text{L}$  internal standard working solution (0.1  $\mu\text{M}$  glyburide/labetalol in methanol/ACN) were combined, followed by capping and vortexing. Then, was added: 20  $\mu\text{L}$  of ACN/MeOH for the samples or 20  $\mu\text{L}$  of a standard solution for the calibrant and QCs. C. Vials were vortexed and centrifuged at 10,000xg for 10 min @ 4°C. D. 150  $\mu\text{L}$  of supernatant was transferred to a 0.5 mL well plate and diluted with 150  $\mu\text{L}$  of 0.2% formic acid in MeOH, followed by capping and vortexing. 10  $\mu\text{L}$  was injected on the LC-MS/MS. Non-compartment analysis (NCA) was performed on the composite PK profiles using WinNonlin 8.3.

**Table S5.** Pharmacokinetic study of double prodrug **62** (containing both ester and carbamate prodrug moieties), administered by oral gavage (p.o.) in female CD1 mice. The product (active drug) is compound **1**. The study was performed by Paraza Pharma, Inc., 7171 Frederick Banting, Montréal, Canada H4S 1Z9 (C064-011\_PS-2021-012). **62** is a monoester/carbamate double prodrug of **1**. Related to structures shown in Table 1 and Scheme 4.

**Table S5A.** Plasma concentration of **62**.

Plasma concentration (ng/mL) of **62** following a single administration of **62** at 10 mg/kg, p.o., to female CD1 mice

| Time (h)                    | Animal ID |        |        | Mean (ng/mL) | SD (ng/mL) | %CV   |
|-----------------------------|-----------|--------|--------|--------------|------------|-------|
|                             | A         | B      | C      |              |            |       |
| 0.25                        | 22.7      | 16.0   | 32.2   | 23.7         | 8.14       | 34.37 |
| 0.5                         | 156.6     | 64.0   | 195.7  | 138.8        | 67.7       | 48.77 |
| 1                           | 751.0     | 764.0  | 987.1  | 834.0        | 132.7      | 15.91 |
| 2                           | 533.6     | 474.1  | 290.9  | 432.9        | 126.5      | 29.22 |
| 4                           | 81.5      | 194.6  | 77.3   | 117.8        | 66.5       | 56.49 |
| 7                           | 29.0      | 70.6   | 19.2   | 39.6         | 27.3       | 68.81 |
| 24                          | NQ        | NQ     | NQ     | -            | -          | -     |
| $C_{max}$ (ng/mL)           | 751.0     | 764.0  | 987.1  | 834.0        | 132.7      | 15.91 |
| $t_{max}$ (h)               | 1.00      | 1.00   | 1.00   | 1.00         | 0.00       | 0.00  |
| $t_{1/2}$ (h)               | 1.23      | 1.84   | 1.29   | 1.45         | 0.33       | 22.97 |
| $AUC_{last}$ (ng/mL*h)      | 1675.4    | 1904.5 | 1480.2 | 1686.7       | 212.3      | 12.59 |
| $AUC_{inf}$ (ng/mL*h)       | 1726.9    | 2091.4 | 1516.0 | 1778.1       | 291.1      | 16.37 |
| % Extrapolation             | 2.98      | 8.94   | 2.36   | 4.76         | 3.63       | 76.25 |
| %F                          | -         | -      | -      | 6.92         |            |       |
| $V_z \cdot F$ (L/kg)        | 10.3      | 12.7   | 12.3   | 11.7         | 1.3        | 10.93 |
| CL <sub>F</sub> (mL/min/kg) | 96.5      | 79.7   | 109.9  | 95.4         | 15.2       | 15.89 |
| MRT <sub>po,inf</sub> (h)   | 2.18      | 3.11   | 1.94   | 2.41         | 0.62       | 25.54 |

NQ: Not quantifiable. No peak or below limit of quantification (LOQ: 5.00 ng/mL)

Data points highlighted in blue were used for the half-life and  $AUC_{inf}$  estimation.

**Table S5B.** Plasma concentration of active drug **1** following prodrug **62** administration.Plasma concentration (ng/mL) of **1** following a single administration of **62** at 10 mg/kg, p.o., to female CD1 mice

| Time (h)               | Animal ID |       |       | Mean (ng/mL) | SD (ng/mL) | %CV   |
|------------------------|-----------|-------|-------|--------------|------------|-------|
|                        | A         | B     | C     |              |            |       |
| 0.25                   | NQ        | NQ    | NQ    | -            | -          | -     |
| 0.5                    | NQ        | NQ    | NQ    | -            | -          | -     |
| 1                      | NQ        | NQ    | NQ    | -            | -          | -     |
| 2                      | 5.32      | 8.84  | 5.48  | 6.55         | 1.99       | 30.34 |
| 4                      | 27.0      | 20.9  | 15.2  | 21.1         | 5.88       | 27.93 |
| 7                      | 38.6      | 34.5  | 25.8  | 33.0         | 6.51       | 19.75 |
| 24                     | 7.89      | NQ    | 5.47  | 6.68         | 1.71       | 25.60 |
| $C_{max}$ (ng/mL)      | 38.6      | 34.5  | 25.8  | 33.0         | 6.51       | 19.75 |
| $t_{max}$ (h)          | 7.00      | 7.00  | 7.00  | 7.00         | 0.00       | 0.00  |
| $AUC_{last}$ (ng/mL*h) | 531.0     | 121.6 | 353.8 | 335.5        | 205.3      | 61.19 |
| $AUC_{inf}$ (ng/mL*h)  | 615.5     | NC    | 413.8 | 514.6        | 142.6      | 27.72 |
| % Extrapolation        | 13.7      | NC    | 14.5  | 14.1         | 0.53       | 3.79  |
| $MRT_{po,inf}$ (h)     | 12.2      | NC    | 12.6  | 12.4         | 0.22       | 1.77  |

Limit of quantification (LOQ: 5.00 ng/mL)

Data points highlighted in blue were used to estimate  $AUC_{inf}$ 

NC: Not calculated due to the shape of the profile

**Figure S6.** Plasma concentration of active drug **1** and prodrug **62**.Pharmacokinetic profile of **62** and **1** following a single administration of **62** at 10 mg/kg, p.o. to female CD-1 mice.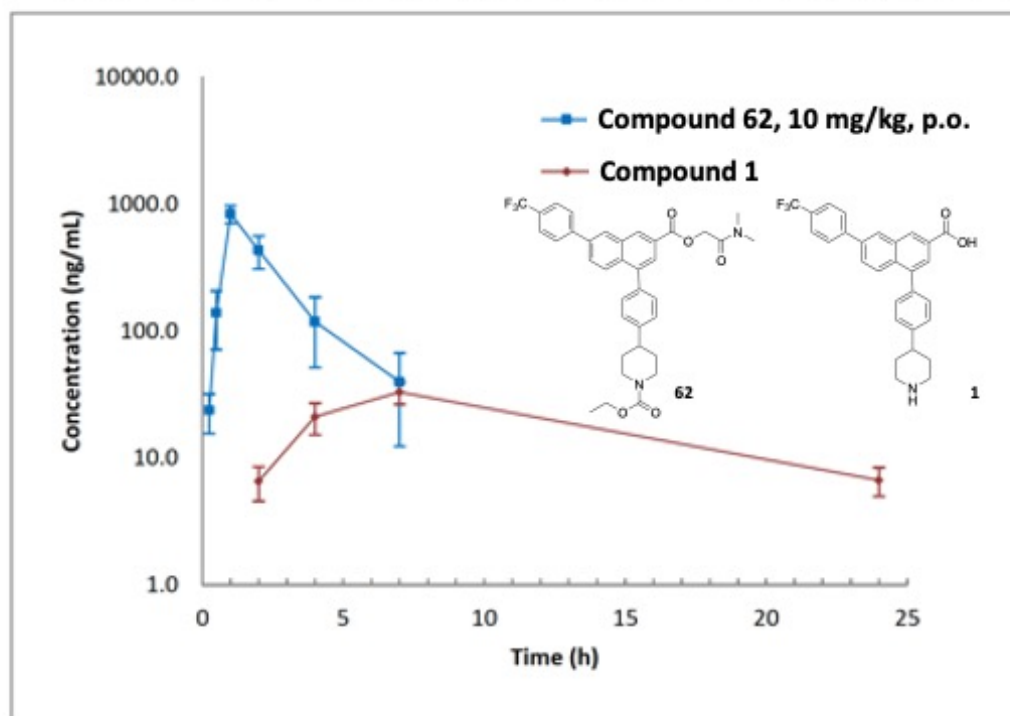

**Figure S7.** BAL fluid content of cells following treatment with compound **15**, its double prodrug **50** and the reference antagonist **1** in an in vivo mouse model (ovalbumin, aspergillus) of allergic asthma. See Figure 4 for content of eosinophils in the same experiment. Methods are described in Wen et al.<sup>5</sup> Refer to Figure 4 in the main text.

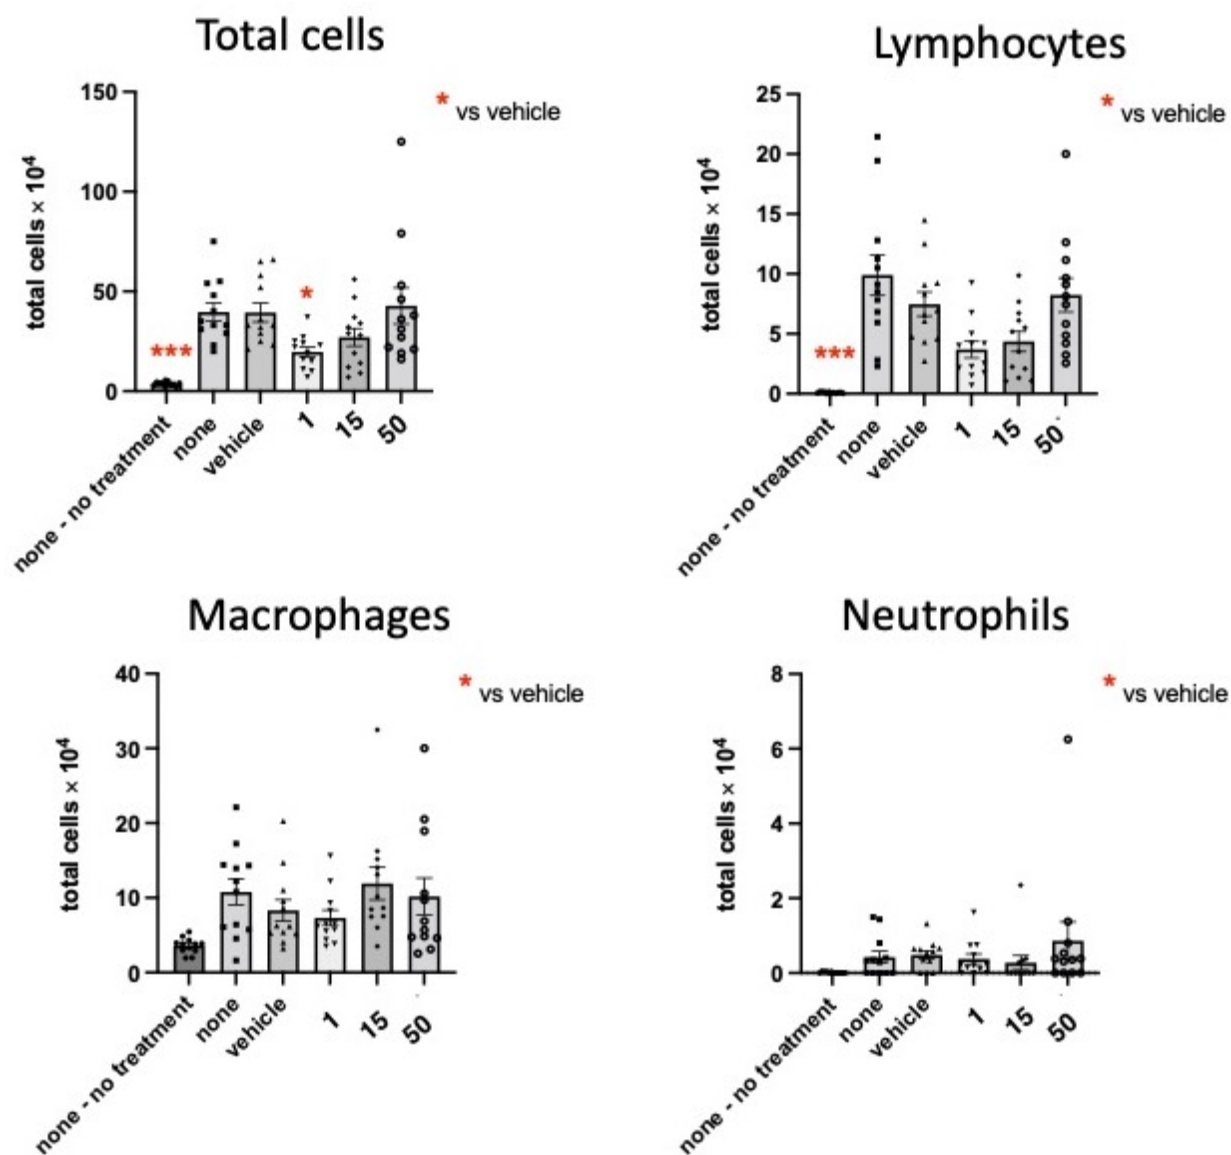

**Figure S8.** Additional mouse CCI chronic pain results. Refer to Figure 3 in the main text.

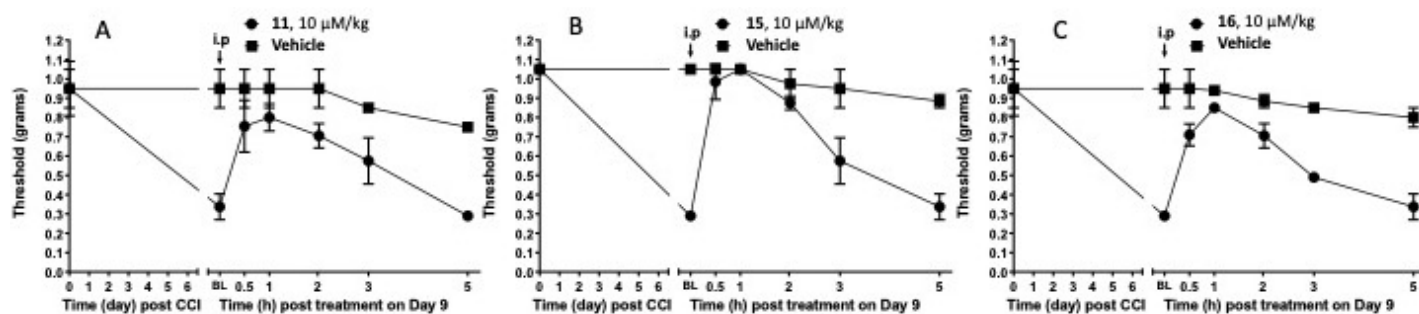

**Figure S8.** Representative time and dose dependence for reversal of established neuropathic pain in adult male by three P2Y<sub>14</sub>R antagonists. The drugs were injected 7 days post-sciatic nerve constriction. The paw withdrawal threshold was determined using von Frey filaments applied to the postsurgical hindpaw. A single injection (10 μmol/kg, i.p.) of a P2Y<sub>14</sub>R antagonist (**11**, **15**, and **16**) reversed the mechano-allodynia, and there was no effect of the drug injection on the contralateral hindpaw (not shown). Data represents the mean ± SD, n = 2. The vehicle used for the i.p. injection: 10% (5% Kolliphor HS-15:DMSO, 5:95 by volume) in saline (0.2 mL dose).

**Figure S9.** Predicted structure of compound **15** (Table 1) showing the spatial proximity of its hydroxyl group to the secondary amine, which would effectively reduce the zwitterionic character (using Chem3D, ChemDraw v. 18.2, PerkinElmer). With Chem3D, the molecule went through MM2 Minimize and MM2 Dynamics functions to achieve the most stable 3D structure. The C-O bond of the hydroxyl group rotates freely at the rigid bridging piperidine structure, and the hydroxyl group H is 2.4 – 4.1 Å away from the amine N.

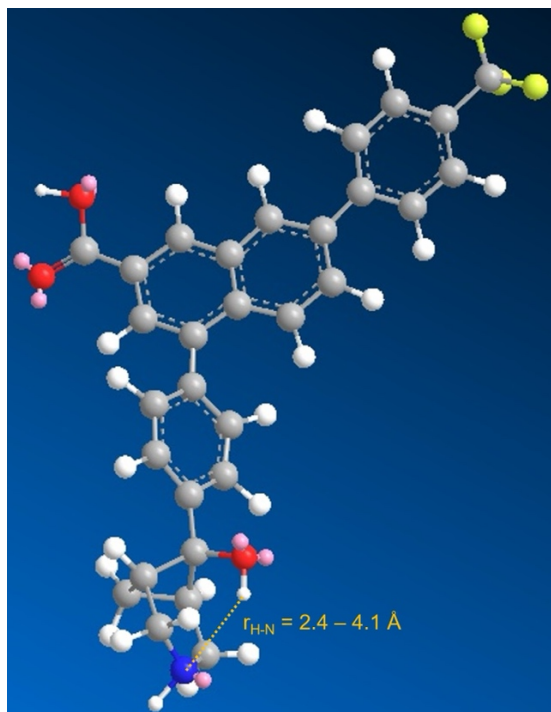

**Figure S10.** Mouse ischemia reperfusion results and procedures (see Legend below).

A

I/R (30 min/48 h), Compound 15 (2 mg/kg/day)

**Control (362-3)**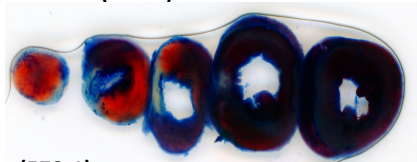**(570-1)**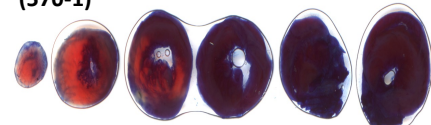**(360-3)**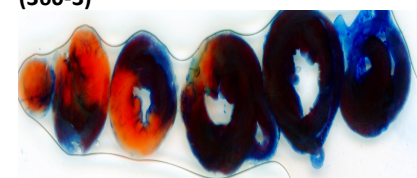**15-Treated (361-1)**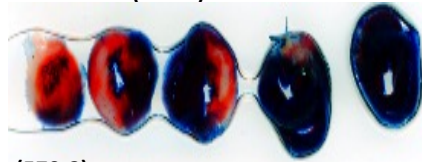**(570-2)**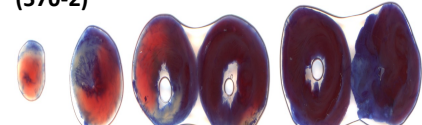**(360-2)**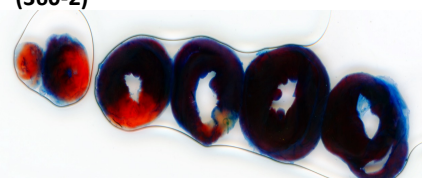

|               |                      |           |              | SEM=SD/N <sup>0.5</sup>                                         |                      |           |          |        |
|---------------|----------------------|-----------|--------------|-----------------------------------------------------------------|----------------------|-----------|----------|--------|
|               |                      |           |              | Incubate MP at 37C for 4 h pre-implantation. Inplant MP pre I/R |                      |           |          |        |
| 48 h post I/R |                      |           |              | 48 h post I/R                                                   |                      |           |          |        |
| 1/6/23        | PBS                  |           |              | Compound 15 ---2 day MP (use 3 day MP, 1 μL/h)                  |                      |           |          |        |
|               | Mouse#               | AAR/TTA % | IF/AAR %     |                                                                 | Mouse#               | AAR/TTA % | IF/AAR % |        |
|               | F                    | 356-1     | 20.646       | 27.063                                                          | F                    | 570-2     | 29.566   | 53.586 |
|               | F                    | 356-3     | 30.124       | 29.894                                                          | M                    | 576-2     | 38.196   | 41.536 |
|               | F                    | 570-1     | 32.335       | 23.285                                                          | F                    | 359-2     | 53.313   | 22.446 |
|               | F                    | 357-1     | 37.396       | 24.930                                                          | F                    | 359-3     | 21.891   | 19.348 |
|               | F                    | 357-3     | 32.385       | 18.325                                                          | F                    | 359-4     | 28.831   | 24.087 |
|               | M                    | 574-1     | 30.005       | 21.536                                                          | F                    | 359-5     | 29.758   | 26.337 |
|               | M                    | 574-2     | 38.998       | 18.645                                                          | M                    | 360-2     | 38.983   | 26.796 |
|               | M                    | 576-1     | 27.707       | 24.832                                                          | M                    | 360-4     | 33.427   | 43.332 |
|               | M                    | 360-1     | 40.662       | 26.918                                                          | M                    | 361-1     | 35.413   | 35.967 |
|               | M                    | 360-3     | 41.471       | 35.083                                                          | M                    | 361-3     | 34.909   | 25.439 |
|               | F                    | 362-3     | 32.871       | 32.772                                                          | F                    | 362-1     | 25.165   | 28.870 |
|               | F                    | 362-5     | 26.349       | 33.739                                                          | F                    | 362-4     | 34.590   | 33.508 |
|               |                      |           |              |                                                                 |                      |           |          |        |
|               | <b>Average:</b>      |           | 32.5791      | 26.4185                                                         | <b>Average:</b>      |           | 33.670   | 31.771 |
|               | <b>Standard Dev.</b> |           | 6.2274       | 5.6093                                                          | <b>Standard Dev.</b> |           | 8.015    | 10.130 |
|               | <b>SEM</b>           |           | 1.7977       | 1.6193                                                          | <b>SEM</b>           |           | 2.314    | 2.924  |
|               | <b>Ttest</b>         |           | <b>0.713</b> | <b>0.124</b>                                                    |                      |           |          |        |
|               | <b>N</b>             | 12        | M: 5         | F: 7                                                            | <b>N</b>             | 12        | M: 5     | F: 7   |



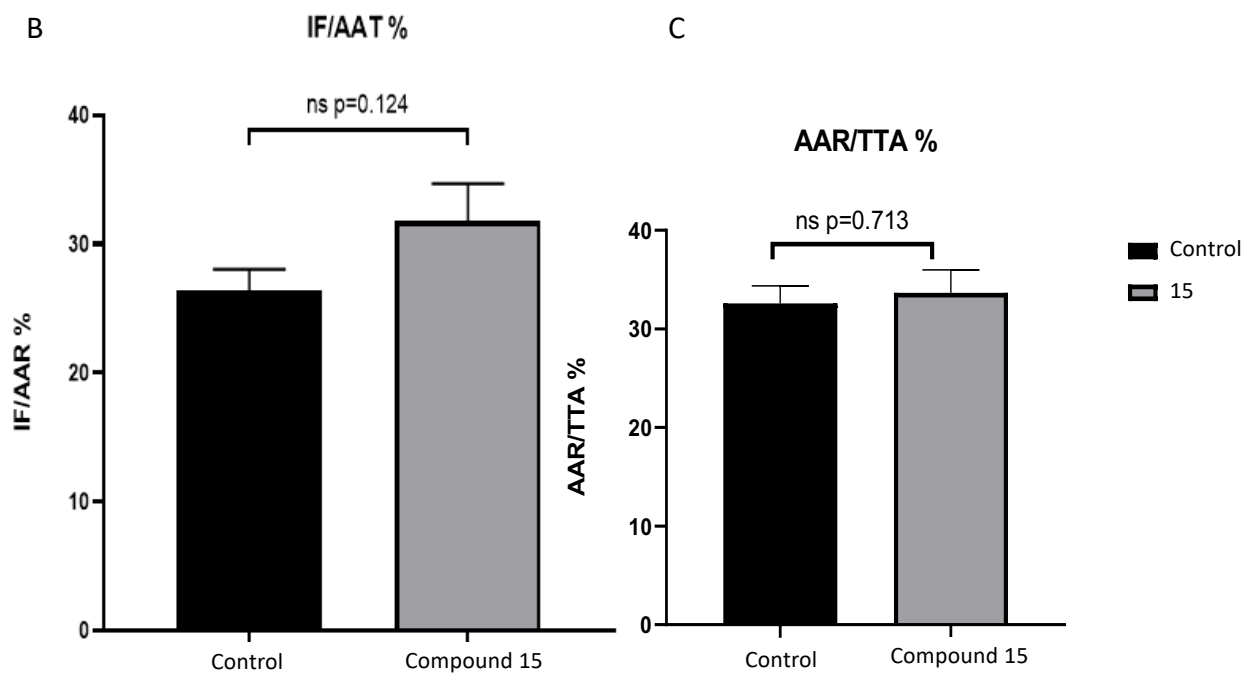

**Figure S10.** A. Representative images showing TTC/Evans Blue stained heart serial sections from adult WT mice subjected to 30 minutes of ischemia produced by left anterior descending artery ligation followed by 48 hours of reperfusion as described in Methods. Mice were given either the drug, Compound **15** (right images) or vehicle (left images) 30 min before ischemia. B. The infarct area (IF) as a percentage of the area at risk (AAR) was shown. Data were mean and SD. The IF/AAR was not different with  $P=0.124$  ( $N=12$  from drug or vehicle treated groups). C. The AAR as a percentage of total area (AAR/TTA) was also not different between the drug- and vehicle-treated mice ( $P=0.713$ ,  $N=12$  for each group). Data were mean  $\pm$  SD.

### Mice

C57BL/6J wild-type mice (000664; JAX) were originally obtained from the Jackson Laboratory (Farmington, CT). Mice were fed a standard rodent chow diet and were housed in microisolator cages in a pathogen-free facility at UConn Health. All experiments followed the UConn Health Institutional Animal Care and Use Committee (IACUC) guidelines with approval according to criteria outlined in the Guide for the Care and Use of Laboratory Animals from the National Institutes of Health. Wild type male and female mice aged from 8 to 16 weeks were used.

### Drug delivery and cardiac ischemia-reperfusion injury

Briefly, anesthesia was induced with an intraperitoneal injection of ketamine hydrochloride ( $125 \text{ mg} \cdot \text{kg}^{-1}$ ) and xylazine ( $12.5 \text{ mg} \cdot \text{kg}^{-1}$ ) and then ventilated with 24G $\times$ 3/4" Surflo i.v. catheter using MiniVent 845 (Harvard Apparatus, Holliston, MA). Compound **15** or vehicle was delivered via mini-

osmotic pump (model 1003D, Alzet, Cupertino, CA) implanted subcutaneously. Prior to implantation, pumps were incubated at 37°C incubator for 4 h in order to deliver at a steady 1  $\mu$ L/h yielding a dosing level of 2 mg/kg/day and were then implanted 30 min before ischemia/reperfusion (I/R). **15** was first dissolved in DMSO and further diluted in 8% Kolliphor HS-15 (polyoxyethylated 12-hydroxystearic acid, Millipore Sigma, St. Louis, MO, item 42966)-PBS solution to make a working solution (DMSO-KHS-PBS) delivering at 2 mg/kg/day. Vehicle solution contained the same DMSO-KHS-PBS mixture without **15**.

Mice were subjected to 30 min of myocardial ischemia and 48 h of reperfusion.<sup>7</sup> In brief, surgeries were performed under a dissection microscope (Nikon). Ischemia was achieved by ligating the left anterior descending coronary artery (LAD) using a 7-0 Nylon suture (Ethilon) with a PE-10 tubing placed over the LAD as previously described.<sup>7</sup> Reperfusion was initiated by releasing the ligature and removing the PE-10 tubing. The chest wall was closed, animal extubated and body temperature maintained by a warm light. The loosened suture was left in place and then retied 48 h later to evaluate the ischemic area. Evans blue and TTC double staining were used to determine the area at risk and the infarct size normalized to area at risk. Viable myocardium stained red, and infarcted tissue appeared white. Images were acquired by Epson scanner V600. The infarct area or IF (white), the area at risk or AAR (red and white), and the total left ventricle area or TTA from each section were measured using ImageJ (NIH). Representative images of control (vehicle) and compound **15**-treated animals were shown in Figure S10A. Ratios of IF/AAR (Fig. S10B) and of AAR/TTA (Fig. S10C) were calculated and expressed as percentages.

**$^1\text{H}$  and  $^{13}\text{C}$  NMR spectra of P2Y<sub>14</sub>R ligands**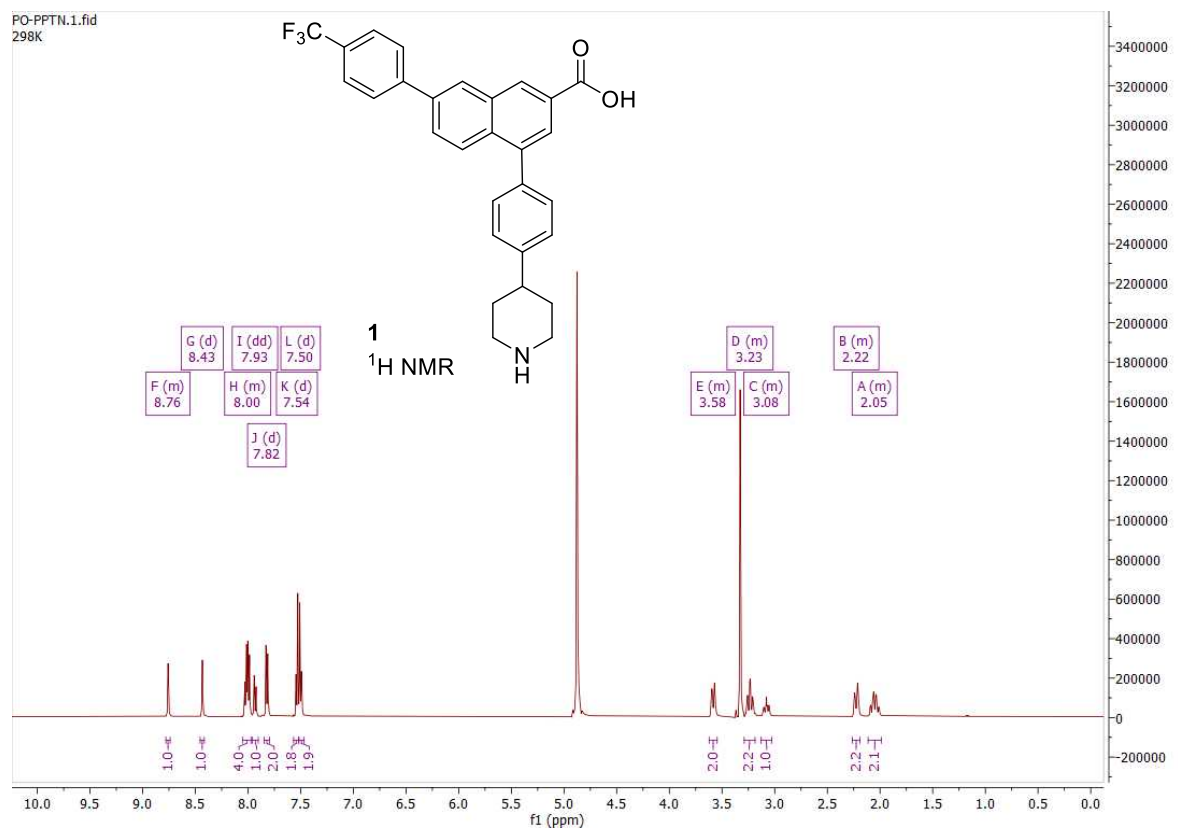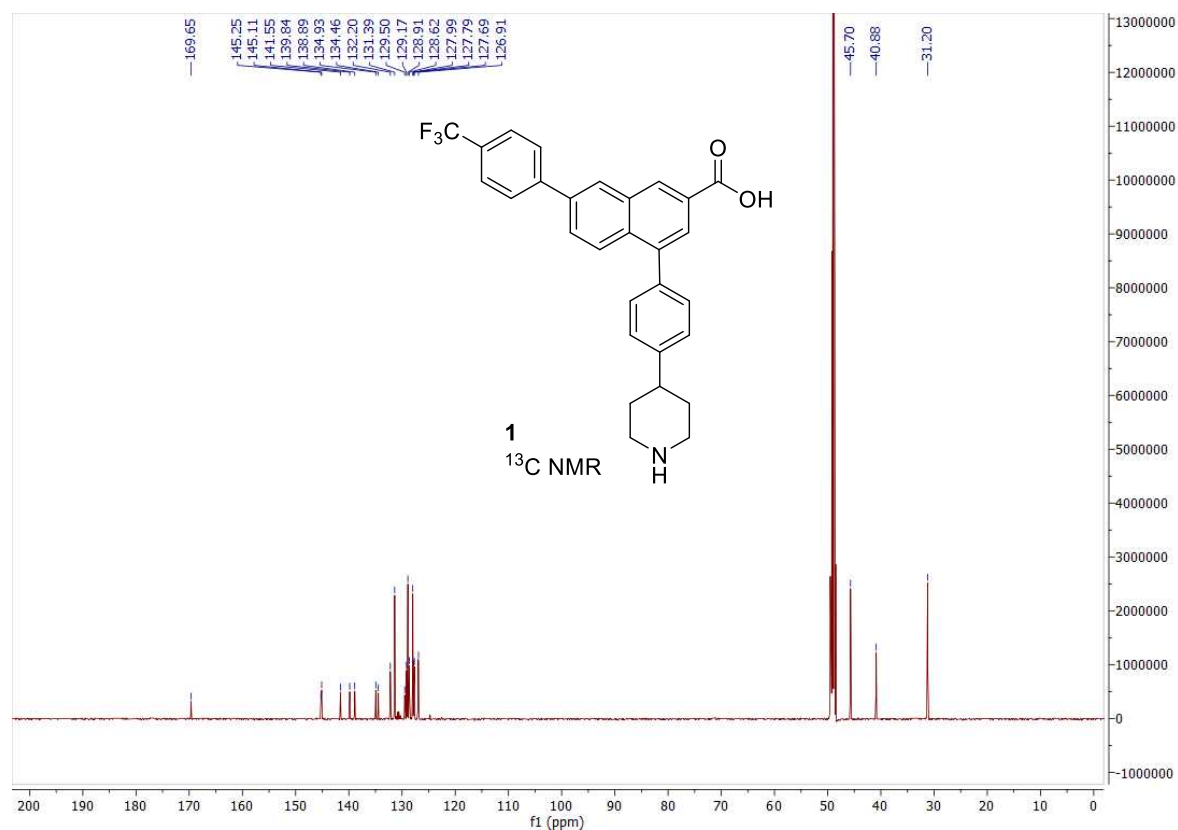

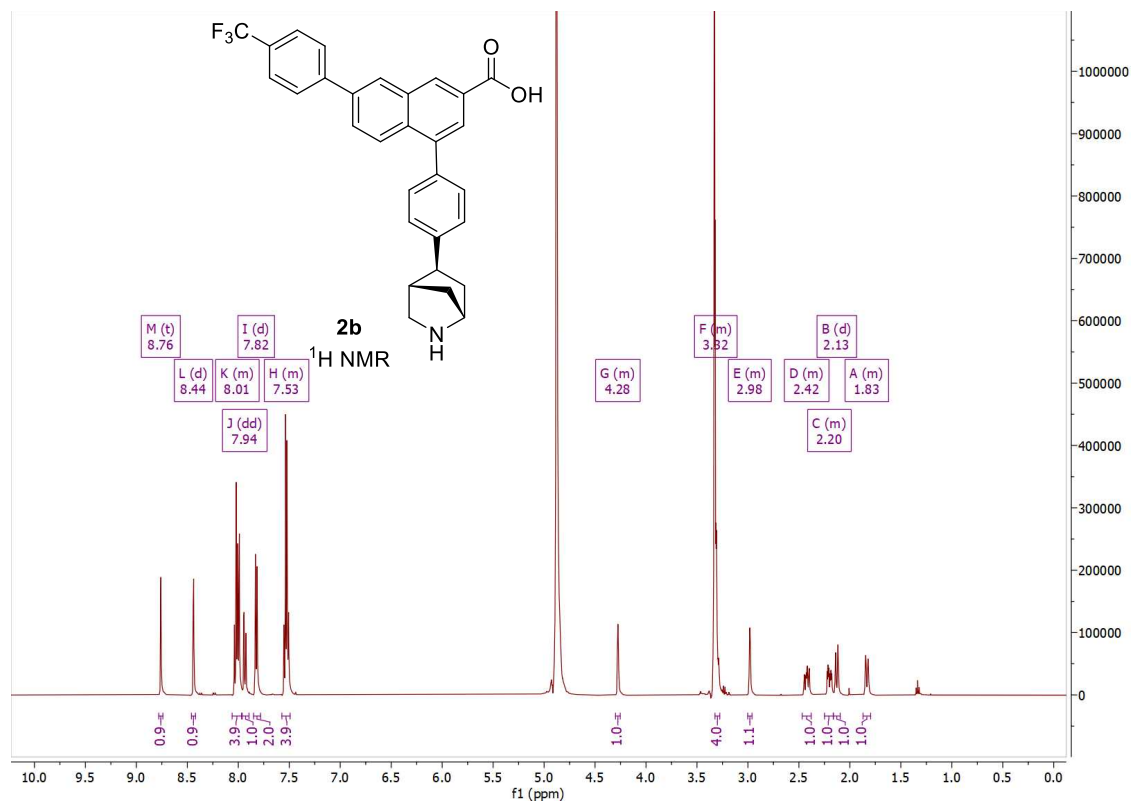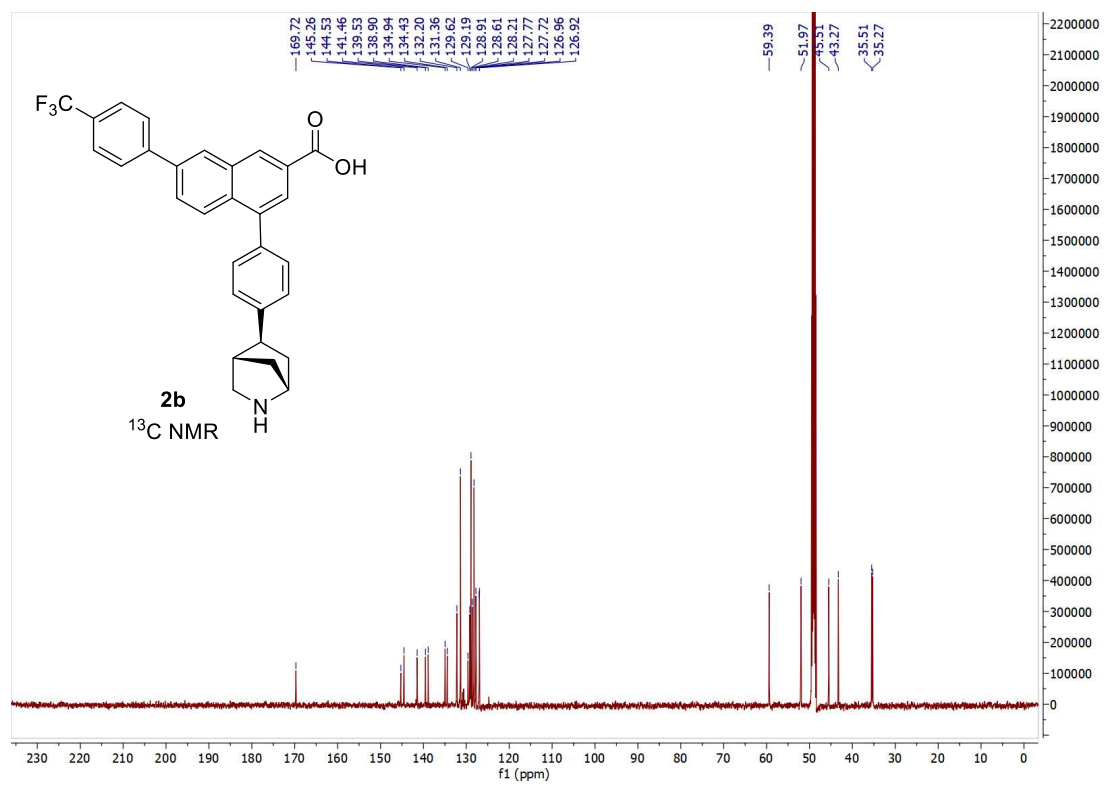

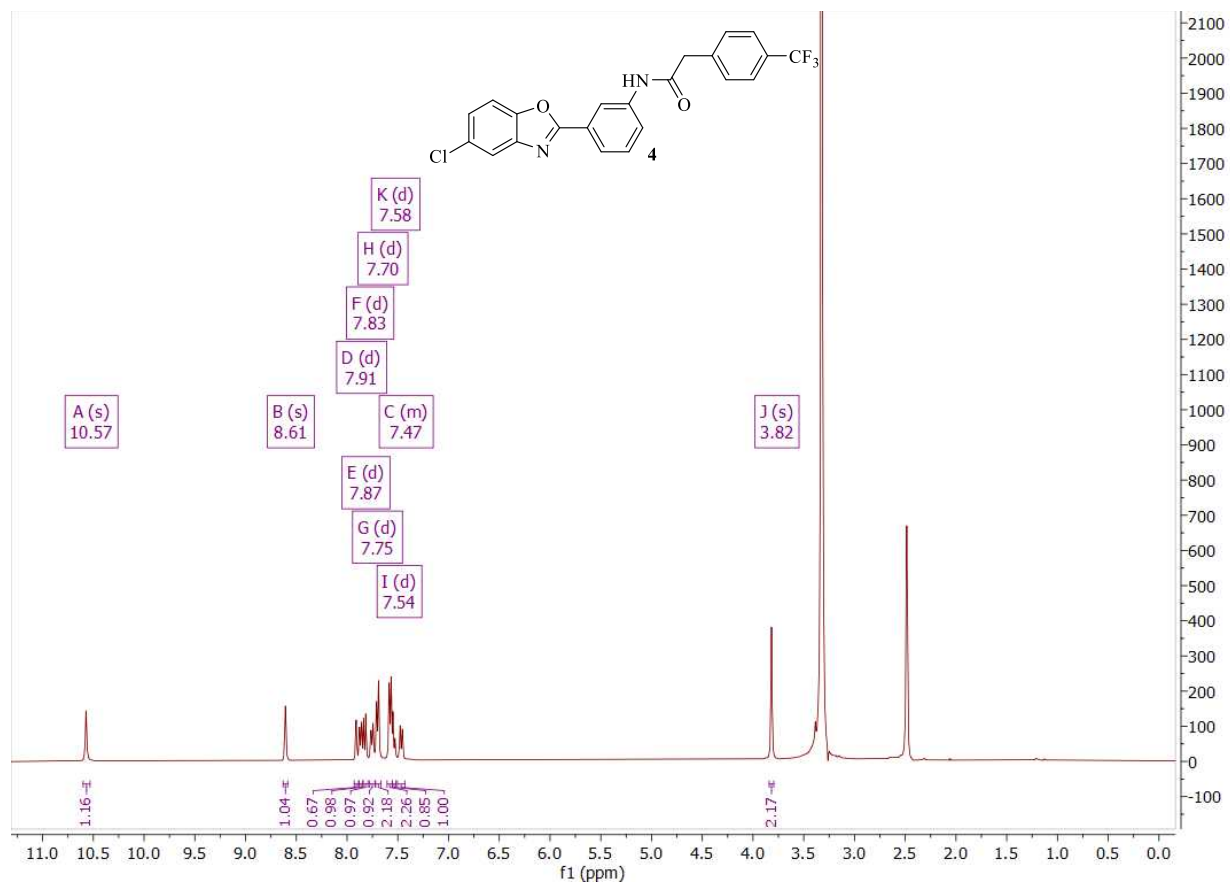

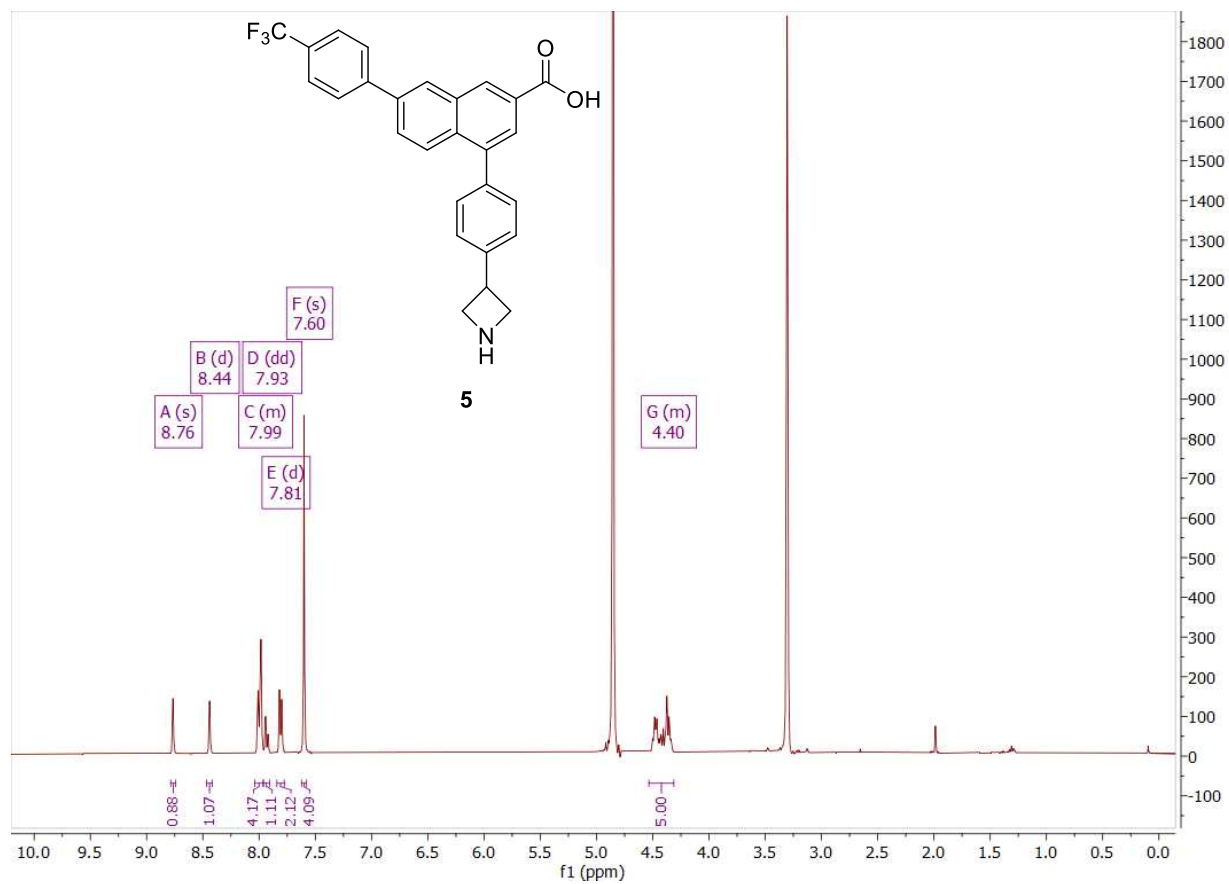

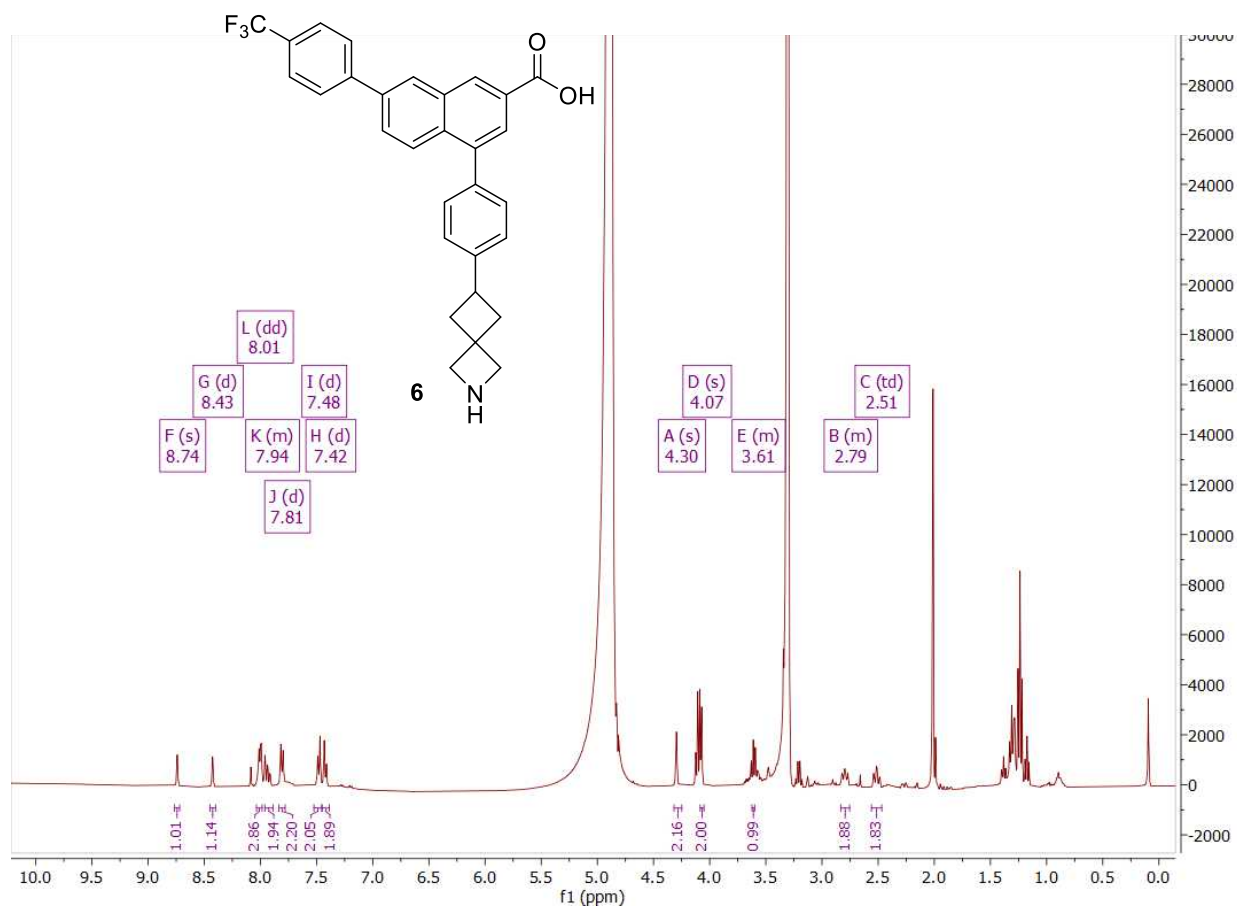

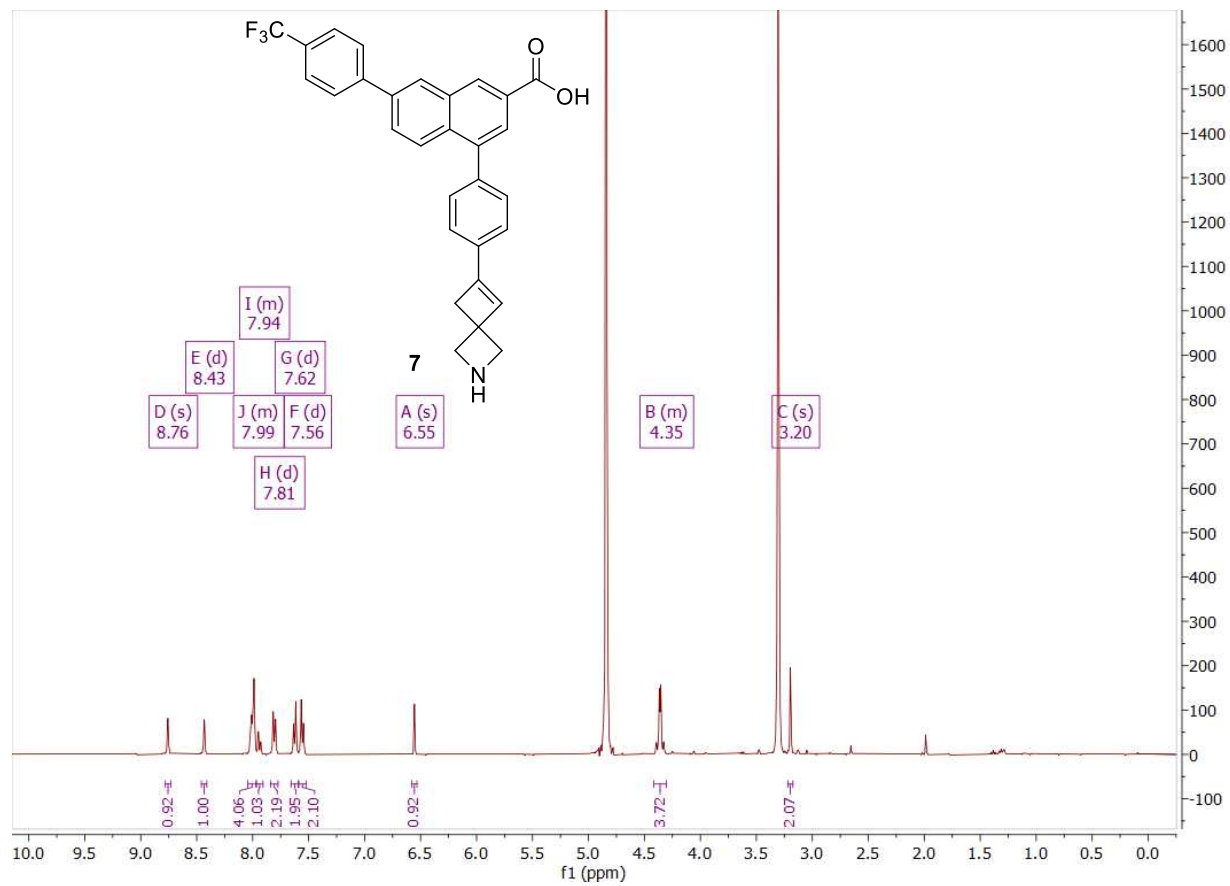



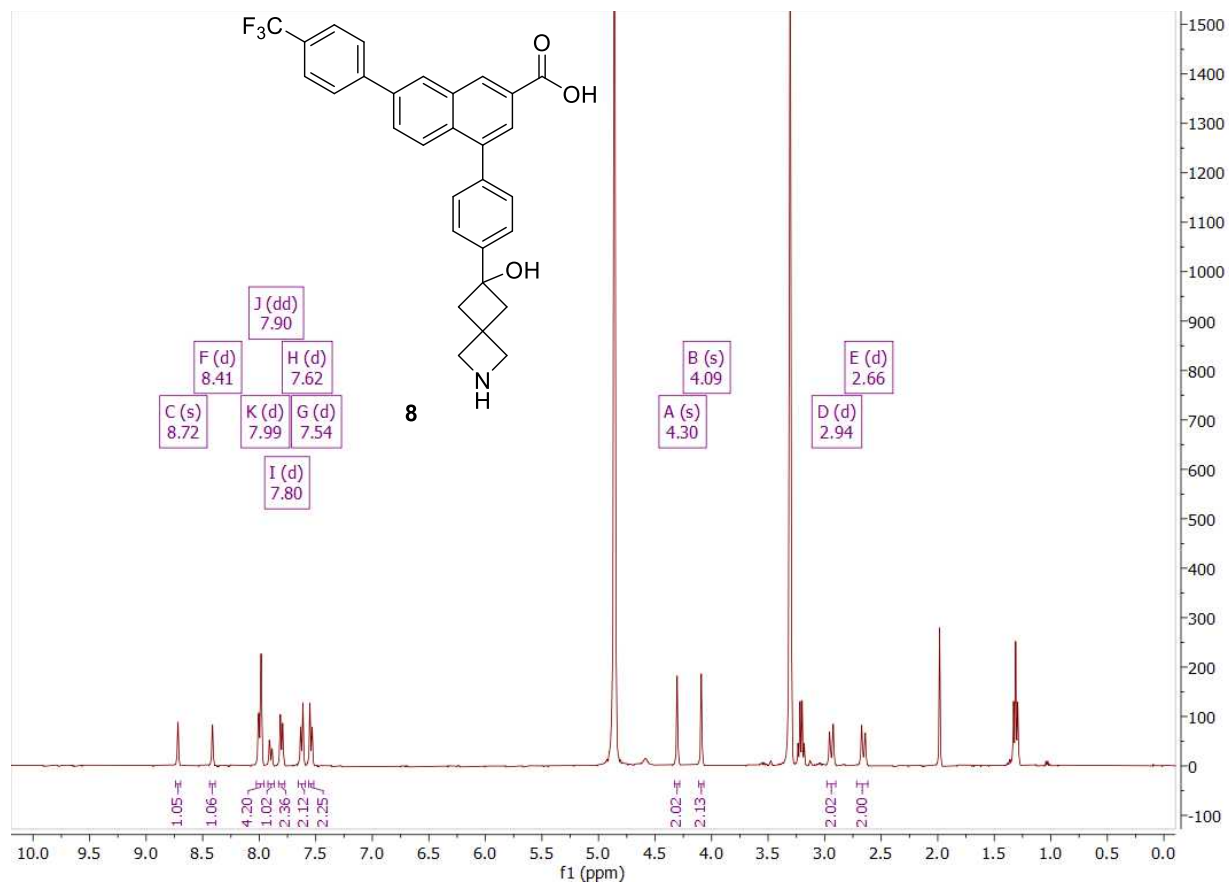

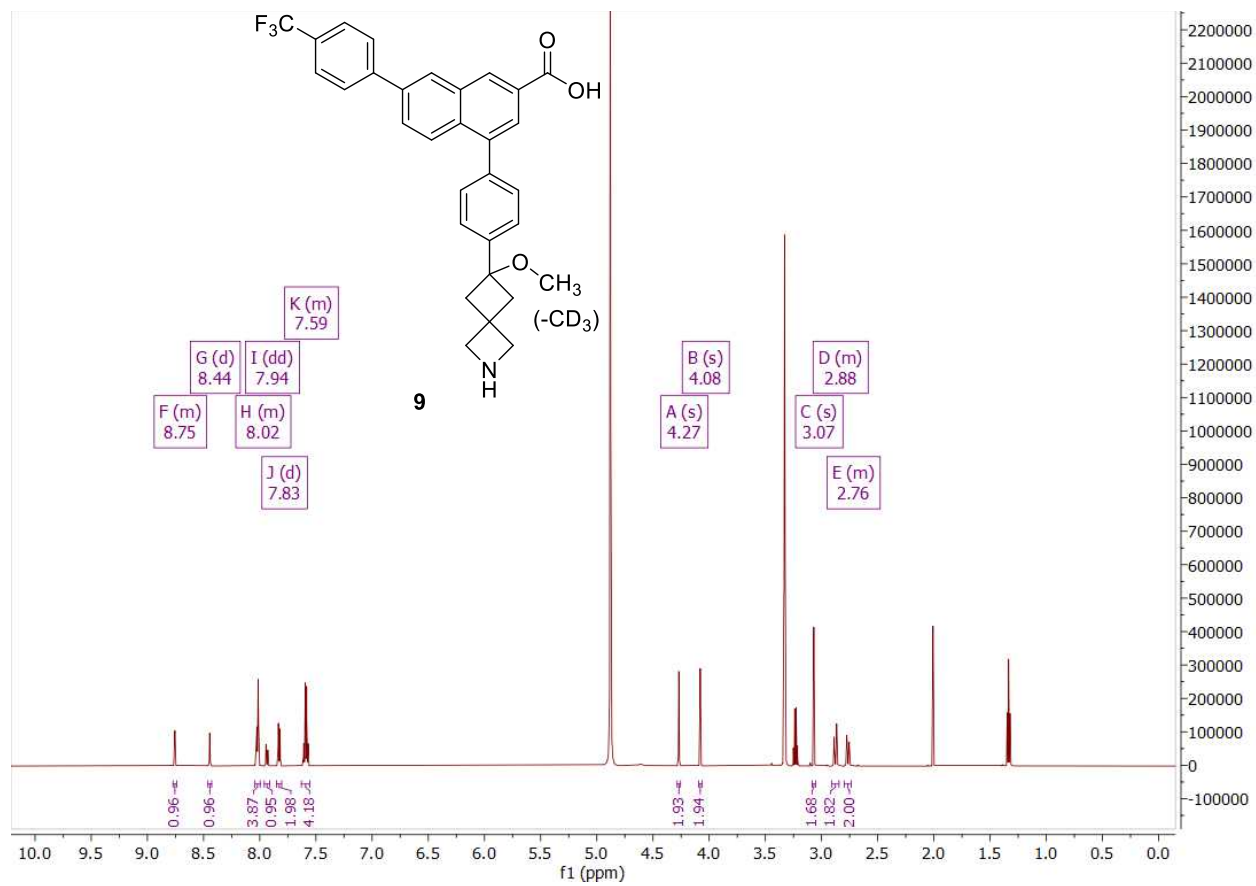

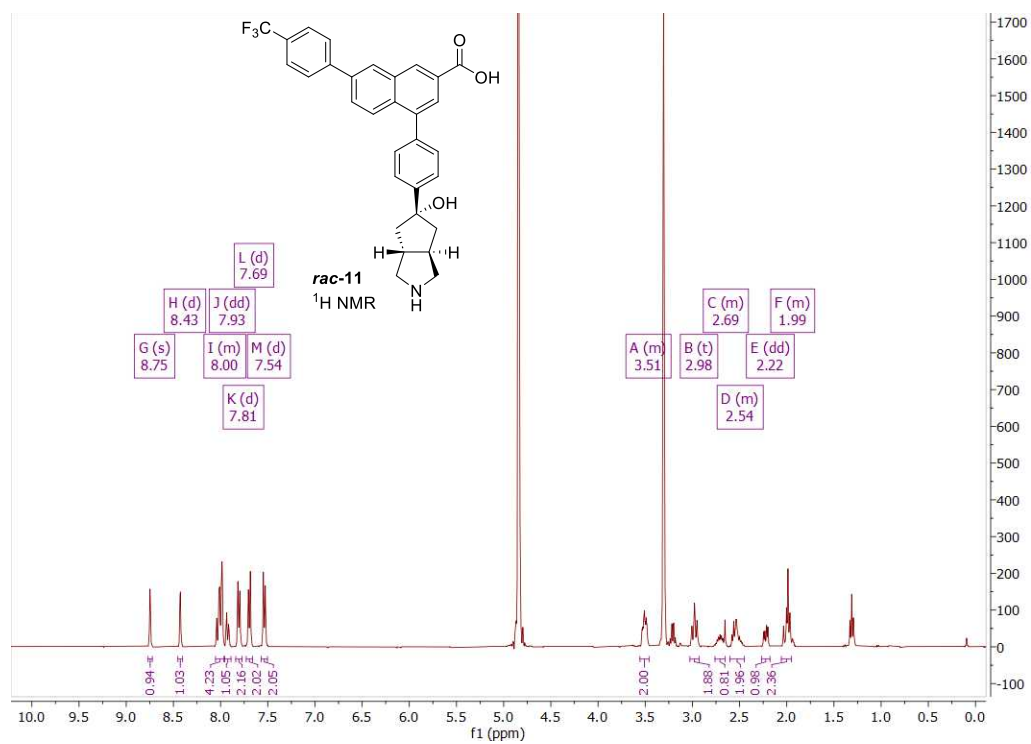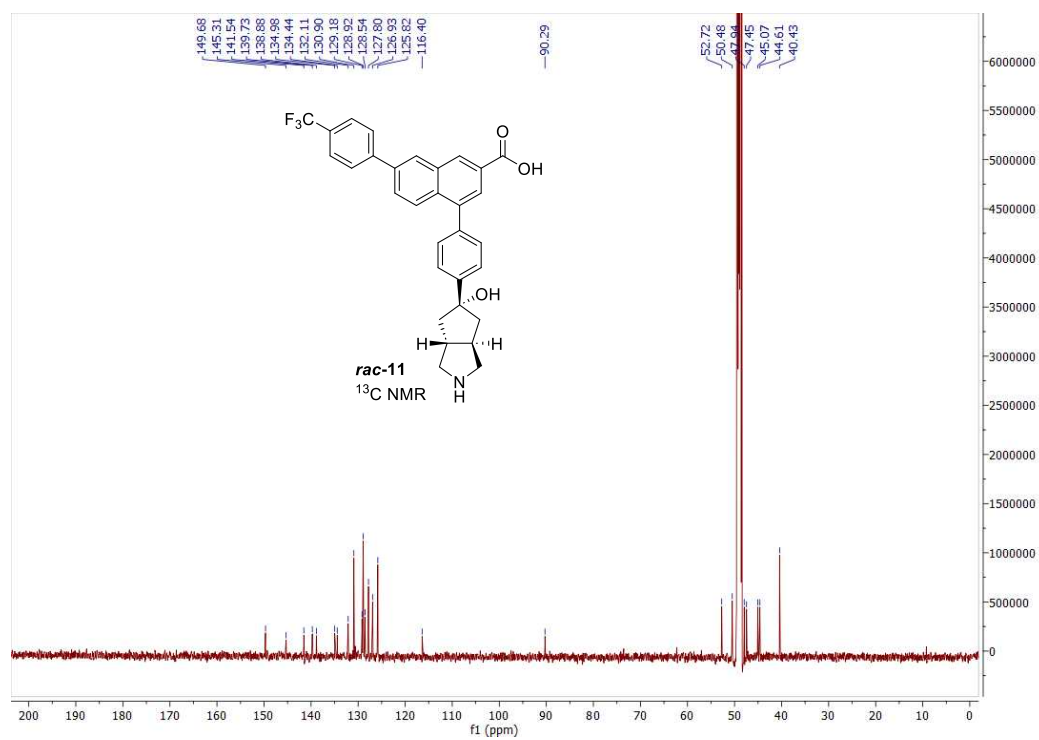

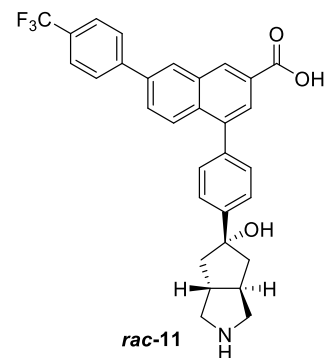

Data File C:\Chem32\1\Data\ZHIWEI\Zhiwei logP 2022-05-06 08-41-49\LogD0000140.D  
 Sample Name: 4822

```

=====
Acq. Operator   : SYSTEM                      Seq. Line : 40
Acq. Instrument : hplc                       Location  : 37
Injection Date  : 5/7/2022 5:02:15 AM        Inj       : 1
                                           Inj Volume: 5.000 µl
Different Inj Volume from Sample Entry! Actual Inj Volume : 2.000 µl
Method          : C:\Chem32\1\Data\ZHIWEI\Zhiwei logP 2022-05-06 08-41-49\ZW_A10-100_B_20MIN.
                                           M (Sequence Method)
Last changed    : 5/6/2022 8:41:49 AM by SYSTEM
Additional Info : Peak(s) manually integrated
  
```

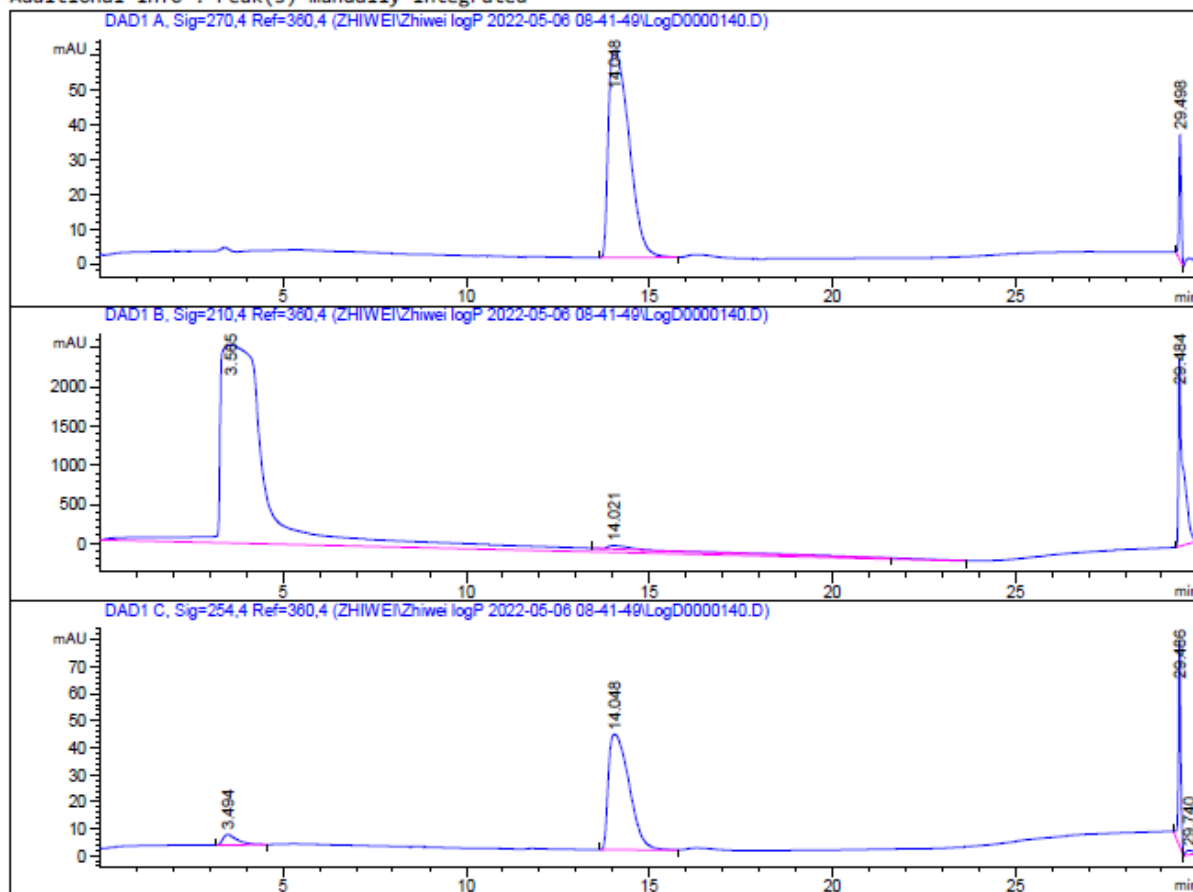

```

=====
                          Area Percent Report
=====

```

```

Sorted By           :      Signal
Multiplier          :      1.0000
Dilution           :      1.0000
Use Multiplier & Dilution Factor with ISTDs

```

```

Signal 1: DAD1 A, Sig=270,4 Ref=360,4

```

| Peak # | RetTime [min] | Type | Width [min] | Area [mAU*s] | Height [mAU] | Area %  |
|--------|---------------|------|-------------|--------------|--------------|---------|
| 1      | 14.048        | BB   | 0.6436      | 2344.19214   | 59.76582     | 94.0992 |
| 2      | 29.498        | BB   | 0.0612      | 146.99936    | 36.33860     | 5.9008  |

```
Totals :                2491.19150  96.10442
```

```

Signal 2: DAD1 B, Sig=210,4 Ref=360,4

```

| Peak # | RetTime [min] | Type | Width [min] | Area [mAU*s] | Height [mAU] | Area %  |
|--------|---------------|------|-------------|--------------|--------------|---------|
| 1      | 3.565         | BV R | 1.1132      | 2.39374e5    | 2540.63550   | 90.4983 |
| 2      | 14.021        | VB E | 1.2352      | 4197.96729   | 46.32541     | 1.5871  |
| 3      | 29.484        | BBA  | 0.1196      | 2.09346e4    | 2403.77271   | 7.9146  |

```
Totals :                2.64507e5  4990.73361
```

```

Signal 3: DAD1 C, Sig=254,4 Ref=360,4

```

| Peak # | RetTime [min] | Type | Width [min] | Area [mAU*s] | Height [mAU] | Area %  |
|--------|---------------|------|-------------|--------------|--------------|---------|
| 1      | 3.494         | BB   | 0.3909      | 103.13339    | 3.77282      | 4.8186  |
| 2      | 14.048        | BB   | 0.6434      | 1680.17261   | 42.85965     | 78.5016 |
| 3      | 29.486        | BB   | 0.0647      | 333.22409    | 76.71456     | 15.5690 |
| 4      | 29.740        | BBA  | 0.2178      | 23.77453     | 1.63372      | 1.1108  |

```
Totals :                2140.30462  124.98074
```

```

=====
*** End of Report ***

```

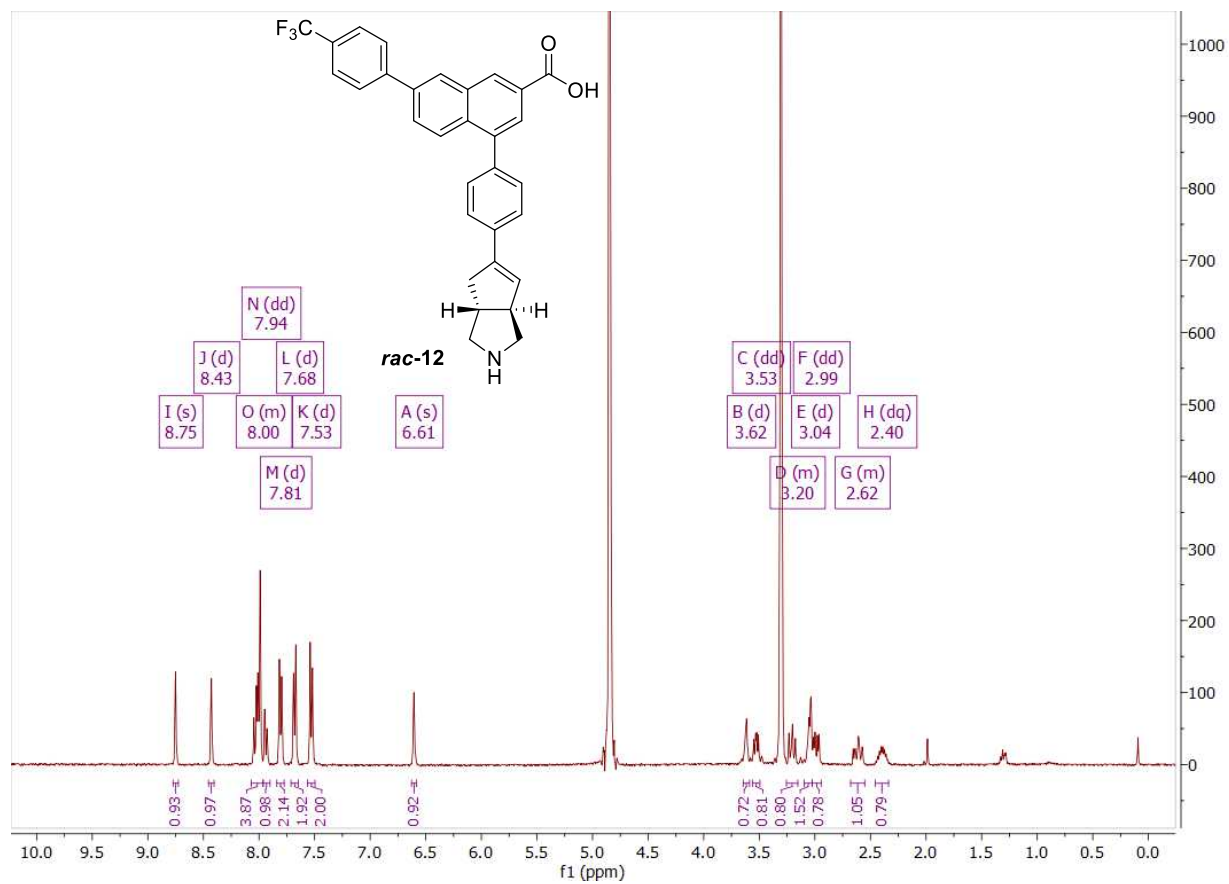

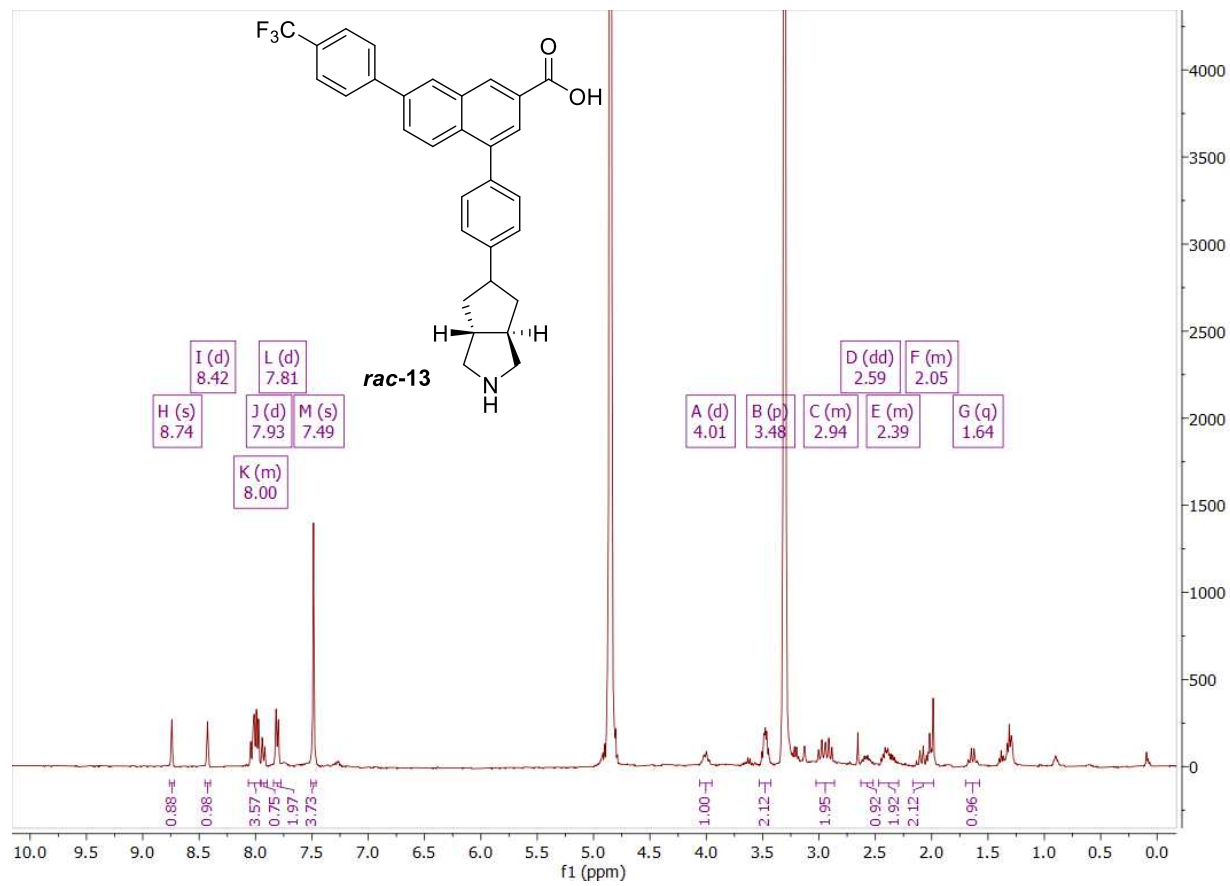

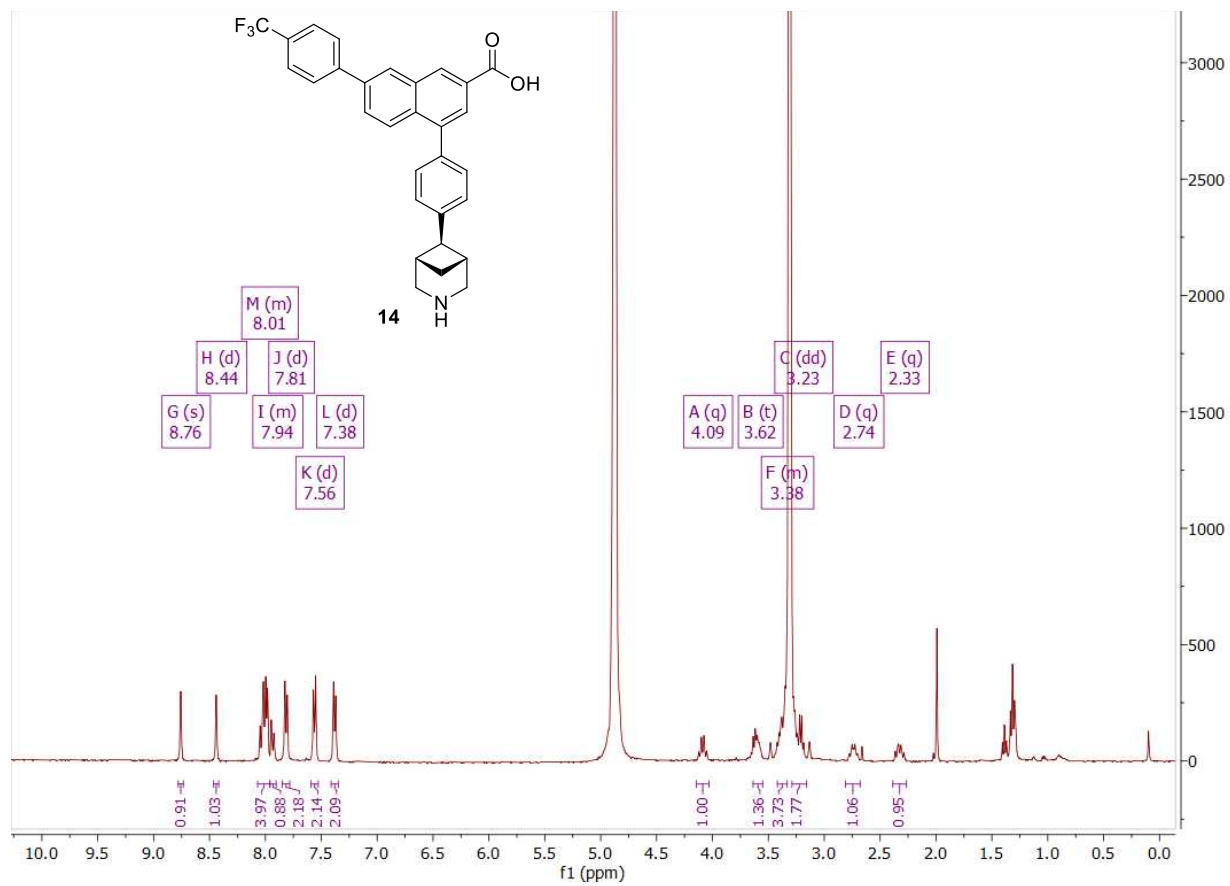



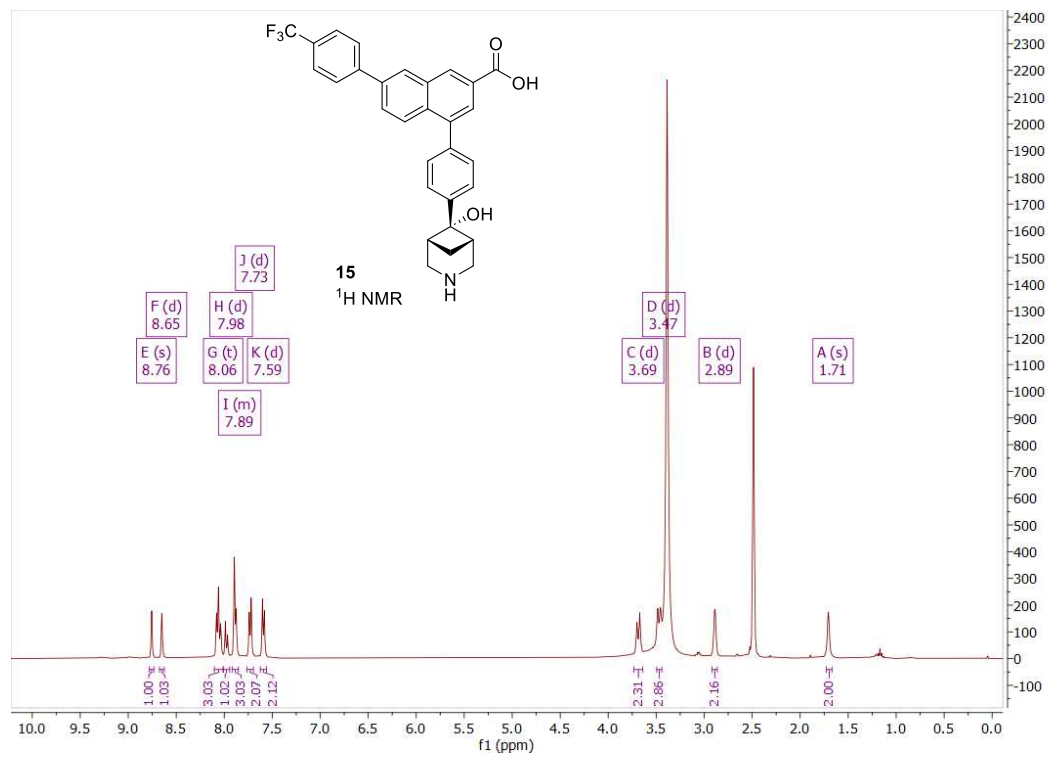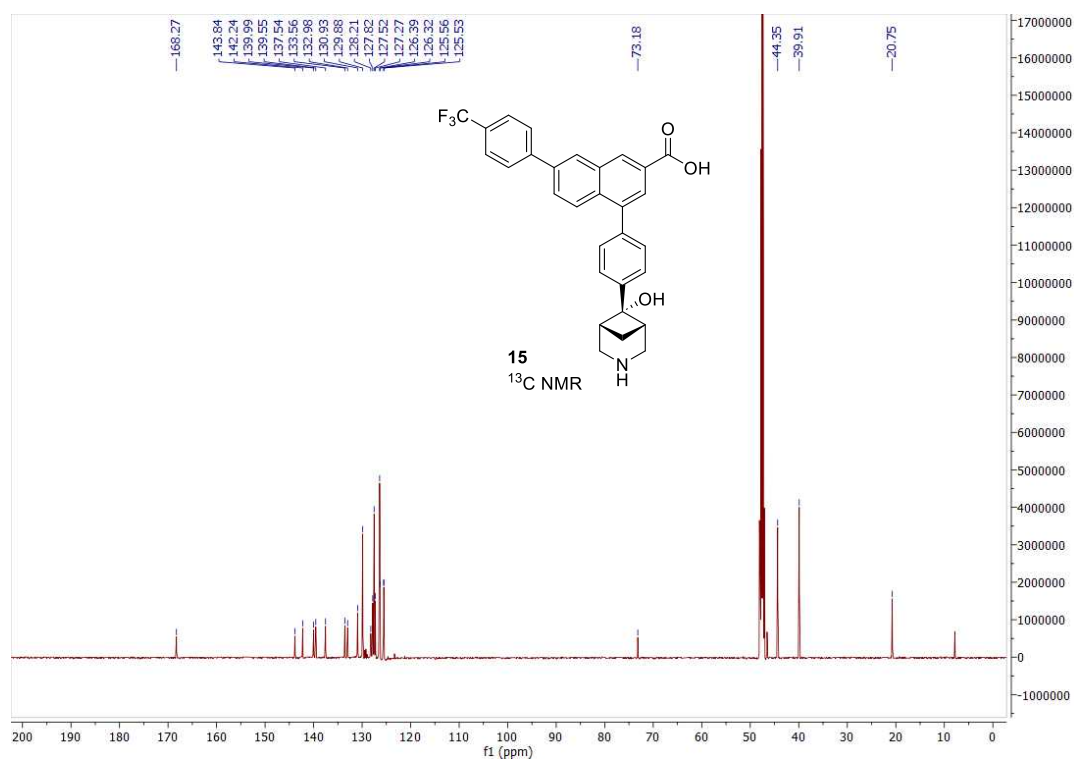

Data File C:\Chem32\1\Data\ZHIWEI\Zhiwei logP 2022-05-06 08-41-49\LogD0000145.D  
 Sample Name: 4833

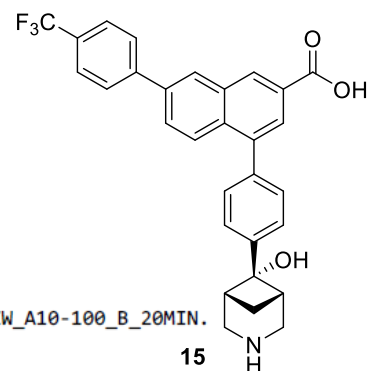

=====

|                                                                                                             |                       |
|-------------------------------------------------------------------------------------------------------------|-----------------------|
| Acq. Operator : SYSTEM                                                                                      | Seq. Line : 45        |
| Acq. Instrument : hplc                                                                                      | Location : 42         |
| Injection Date : 5/7/2022 7:37:53 AM                                                                        | Inj : 1               |
|                                                                                                             | Inj Volume : 5.000 µl |
| Different Inj Volume from Sample Entry! Actual Inj Volume : 2.000 µl                                        |                       |
| Method : C:\Chem32\1\Data\ZHIWEI\Zhiwei logP 2022-05-06 08-41-49\ZW_A10-100_B_20MIN.<br>M (Sequence Method) |                       |
| Last changed : 5/6/2022 8:41:49 AM by SYSTEM                                                                |                       |
| Additional Info : Peak(s) manually integrated                                                               |                       |

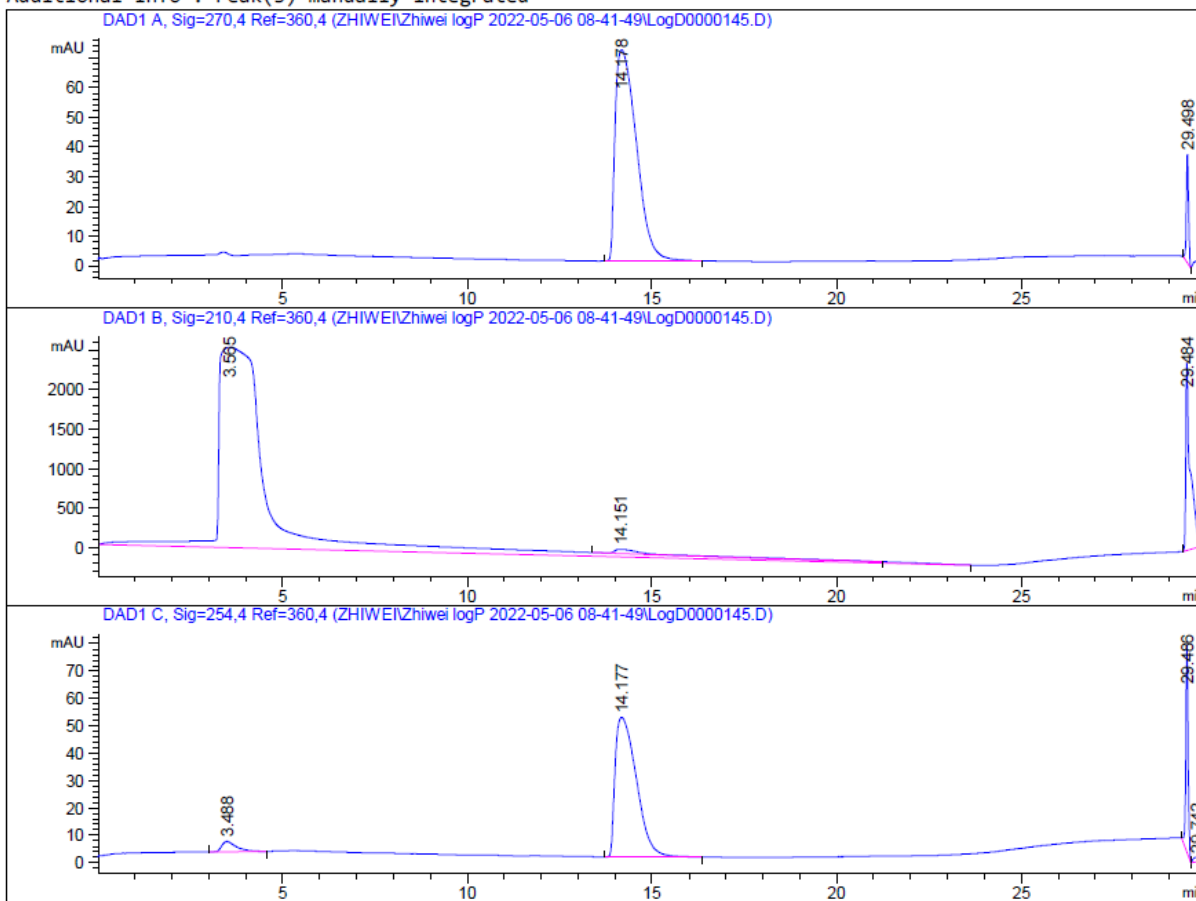

Data File C:\Chem32\1\Data\ZHIWEI\Zhiwei logP 2022-05-06 08-41-49\LogD0000145.D  
 Sample Name: 4833

```

=====
                          Area Percent Report
=====
  
```

```

Sorted By           :      Signal
Multiplier          :      1.0000
Dilution           :      1.0000
Use Multiplier & Dilution Factor with ISTDs
  
```

Signal 1: DAD1 A, Sig=270,4 Ref=360,4

| Peak # | RetTime [min] | Type | Width [min] | Area [mAU*s] | Height [mAU] | Area %  |
|--------|---------------|------|-------------|--------------|--------------|---------|
| 1      | 14.178        | BB   | 0.6516      | 2828.68774   | 70.87802     | 95.0269 |
| 2      | 29.498        | BB   | 0.0614      | 148.03391    | 36.46857     | 4.9731  |

Totals :                    2976.72165   107.34659

Signal 2: DAD1 B, Sig=210,4 Ref=360,4

| Peak # | RetTime [min] | Type | Width [min] | Area [mAU*s] | Height [mAU] | Area %  |
|--------|---------------|------|-------------|--------------|--------------|---------|
| 1      | 3.565         | BV R | 1.1306      | 2.42265e5    | 2540.45801   | 90.6029 |
| 2      | 14.151        | VB E | 1.1141      | 4250.20410   | 53.31234     | 1.5895  |
| 3      | 29.484        | BBA  | 0.1198      | 2.08770e4    | 2392.57080   | 7.8076  |

Totals :                    2.67392e5   4986.34115

Signal 3: DAD1 C, Sig=254,4 Ref=360,4

| Peak # | RetTime [min] | Type | Width [min] | Area [mAU*s] | Height [mAU] | Area %  |
|--------|---------------|------|-------------|--------------|--------------|---------|
| 1      | 3.488         | BB   | 0.3937      | 100.85950    | 3.70393      | 4.0534  |
| 2      | 14.177        | BB   | 0.6495      | 2036.60608   | 51.03893     | 81.8493 |
| 3      | 29.486        | BB   | 0.0643      | 327.37265    | 75.95940     | 13.1568 |
| 4      | 29.742        | BBA  | 0.2400      | 23.40212     | 1.60595      | 0.9405  |

Totals :                    2488.24035   132.30821

```

=====
*** End of Report ***
  
```

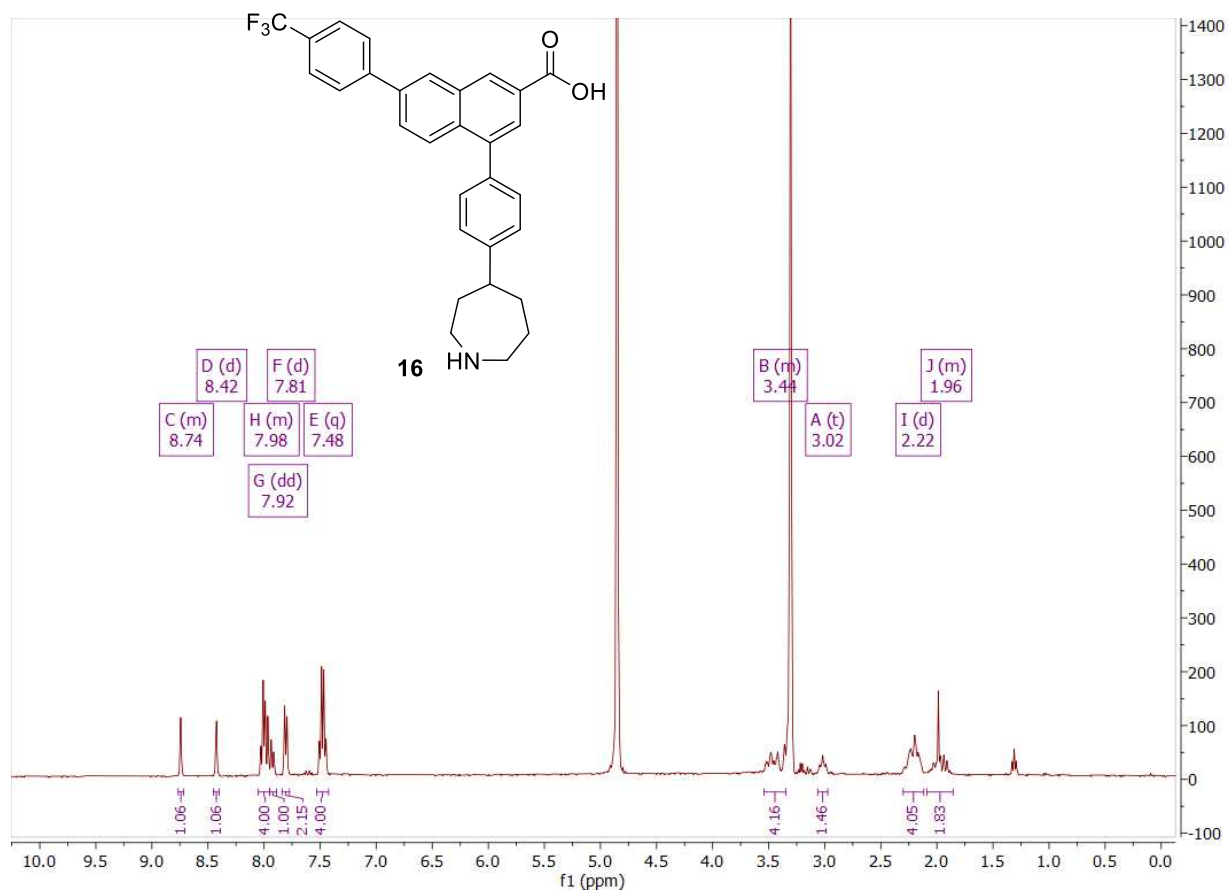

Data File C:\Chem32\1\Data\ZHIWEI\Zhiwei logP 2022-05-06 08-41-49\LogD0000146.D  
 Sample Name: 4826

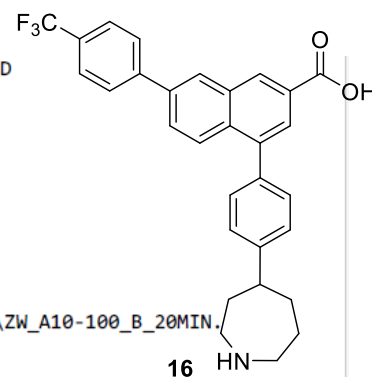

```

=====
Acq. Operator   : SYSTEM                      Seq. Line : 46
Acq. Instrument : hplc                       Location  : 43
Injection Date  : 5/7/2022 8:08:59 AM        Inj       : 1
                                                Inj Volume: 5.000 µl
Different Inj Volume from Sample Entry! Actual Inj Volume : 2.000 µl
Method          : C:\Chem32\1\Data\ZHIWEI\Zhiwei logP 2022-05-06 08-41-49\ZW_A10-100_B_20MIN.
                                                M (Sequence Method)
Last changed    : 5/6/2022 8:41:49 AM by SYSTEM
Additional Info : Peak(s) manually integrated
  
```

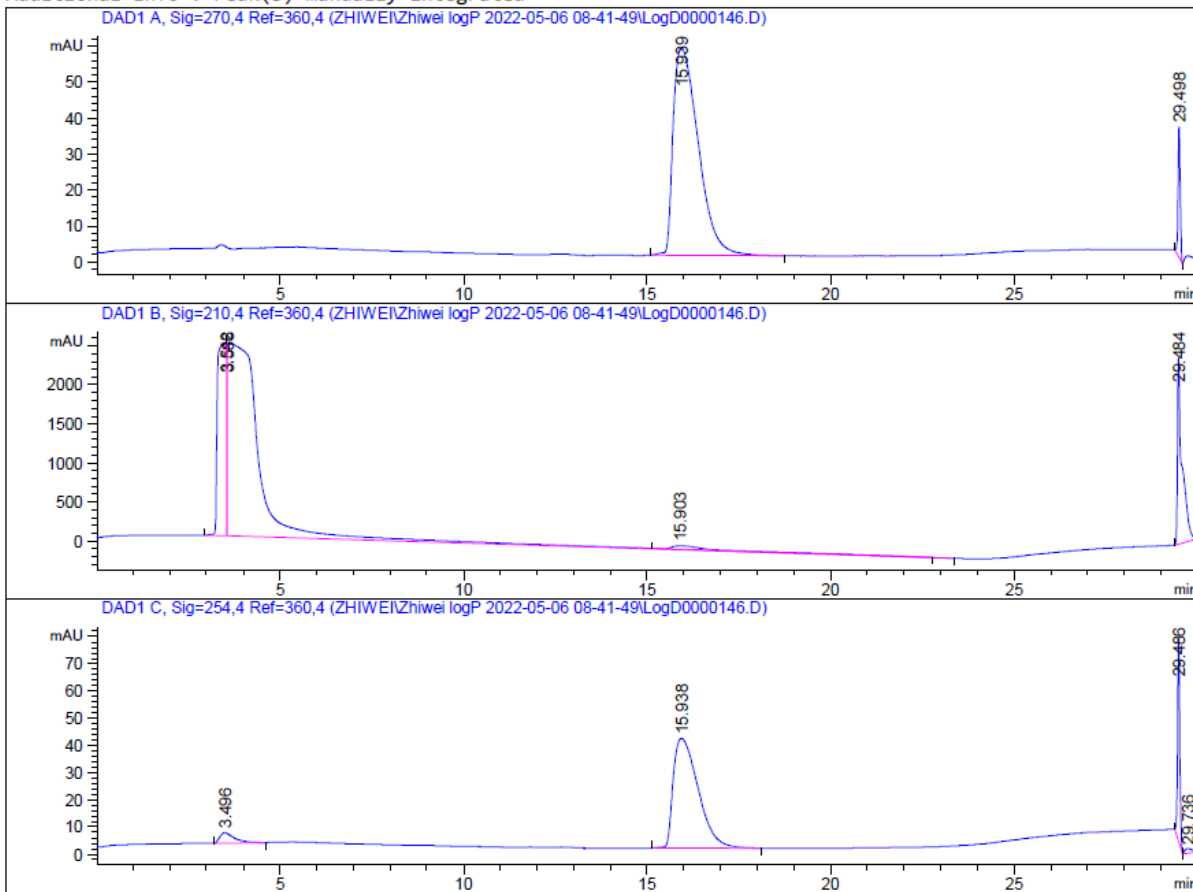

Data File C:\Chem32\1\Data\ZHIWEI\Zhiwei logP 2022-05-06 08-41-49\LogD0000146.D  
 Sample Name: 4826

```

=====
                          Area Percent Report
=====
  
```

```

Sorted By      :      Signal
Multiplier     :      1.0000
Dilution       :      1.0000
Use Multiplier & Dilution Factor with ISTDs
  
```

Signal 1: DAD1 A, Sig=270,4 Ref=360,4

| Peak # | RetTime [min] | Type | Width [min] | Area [mAU*s] | Height [mAU] | Area %  |
|--------|---------------|------|-------------|--------------|--------------|---------|
| 1      | 15.939        | BB   | 0.7404      | 2743.59302   | 57.73376     | 94.9171 |
| 2      | 29.498        | BB   | 0.0611      | 146.92307    | 36.39445     | 5.0829  |

Totals :                    2890.51608    94.12821

Signal 2: DAD1 B, Sig=210,4 Ref=360,4

| Peak # | RetTime [min] | Type | Width [min] | Area [mAU*s] | Height [mAU] | Area %  |
|--------|---------------|------|-------------|--------------|--------------|---------|
| 1      | 3.542         | BV   | 0.2005      | 4.12259e4    | 2472.44702   | 19.3239 |
| 2      | 3.586         | VV R | 0.9928      | 1.47299e5    | 2472.89380   | 69.0438 |
| 3      | 15.903        | VB E | 1.2218      | 3955.44263   | 44.98698     | 1.8540  |
| 4      | 29.484        | BBA  | 0.1178      | 2.08610e4    | 2391.48608   | 9.7782  |

Totals :                    2.13341e5    7381.81388

Signal 3: DAD1 C, Sig=254,4 Ref=360,4

| Peak # | RetTime [min] | Type | Width [min] | Area [mAU*s] | Height [mAU] | Area %  |
|--------|---------------|------|-------------|--------------|--------------|---------|
| 1      | 3.496         | BB   | 0.3782      | 105.61524    | 3.80123      | 4.4841  |
| 2      | 15.938        | BB   | 0.7370      | 1909.96838   | 40.44006     | 81.0910 |
| 3      | 29.486        | BB   | 0.0631      | 316.21457    | 75.17724     | 13.4254 |
| 4      | 29.736        | BBA  | 0.2144      | 23.54059     | 1.63075      | 0.9995  |

Totals :                    2355.33879    121.04927

```

=====
*** End of Report ***
  
```

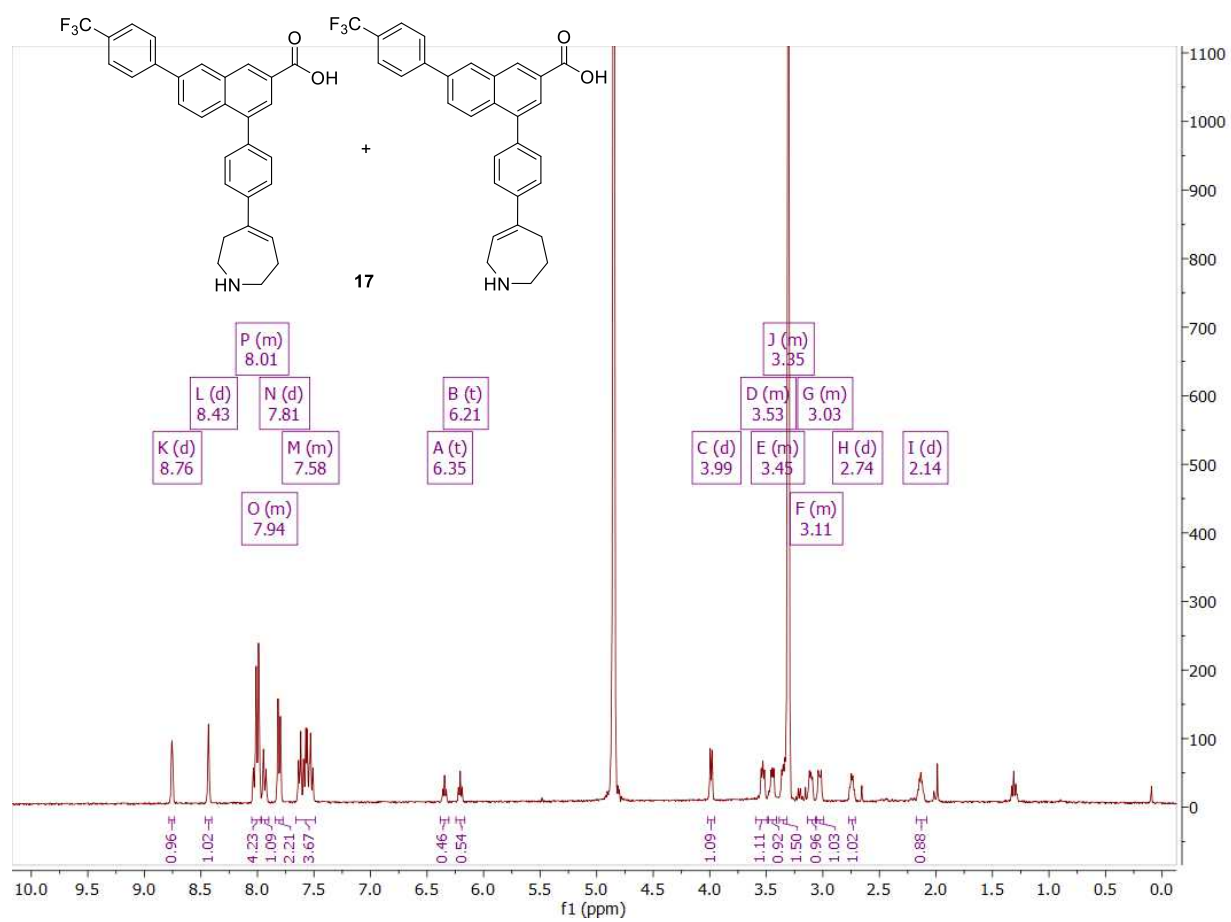

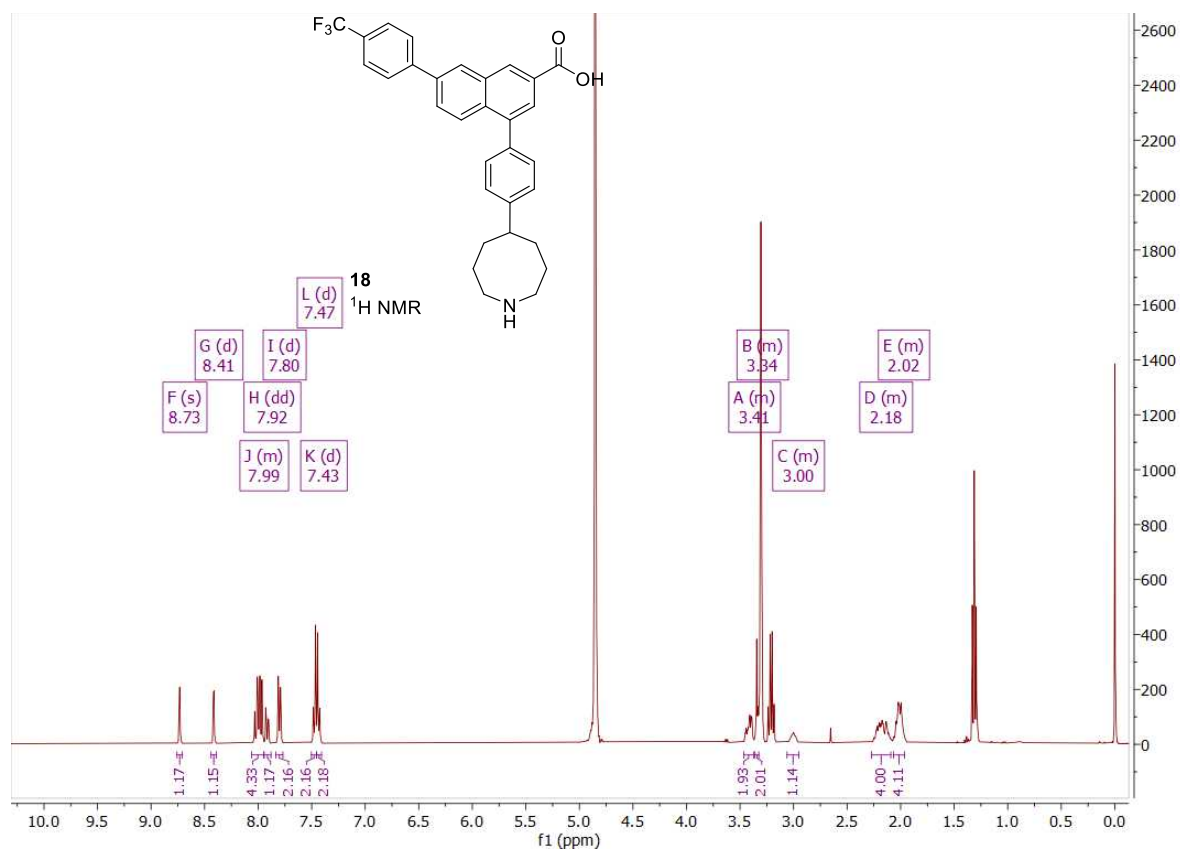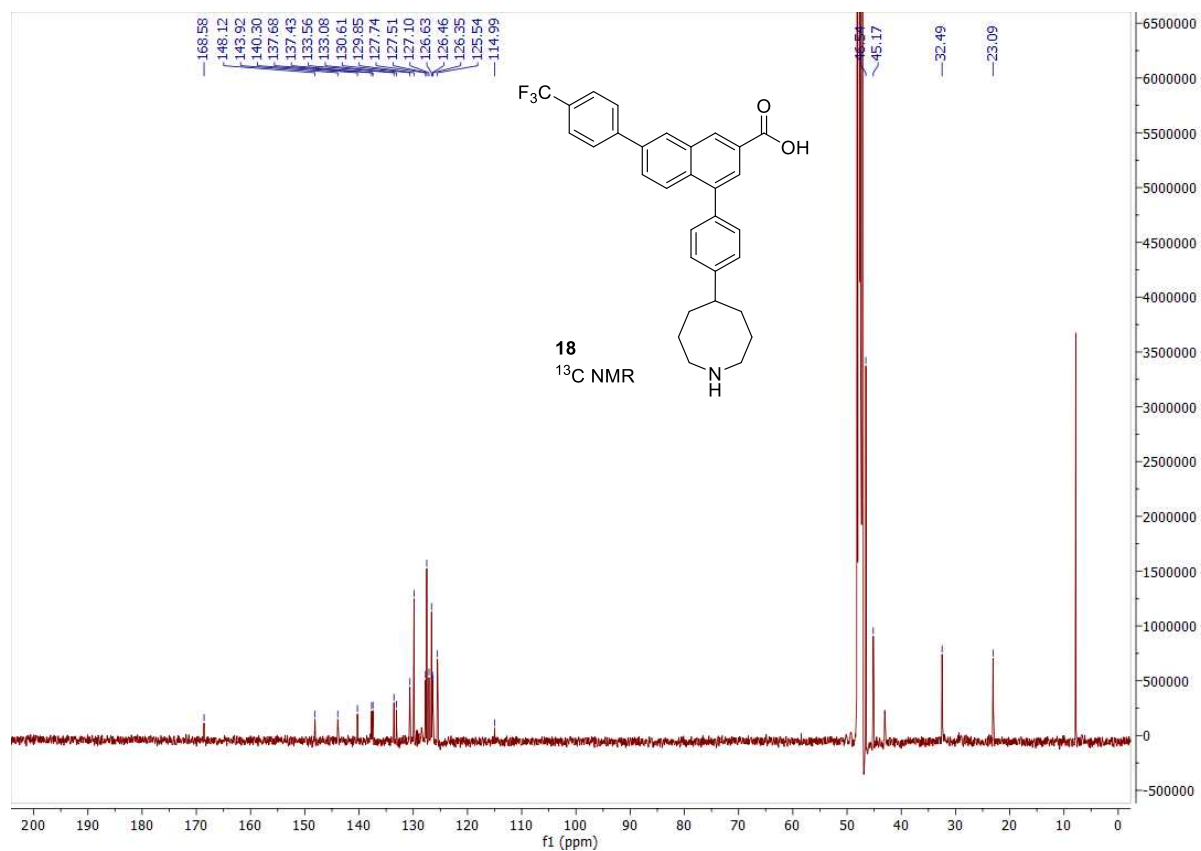



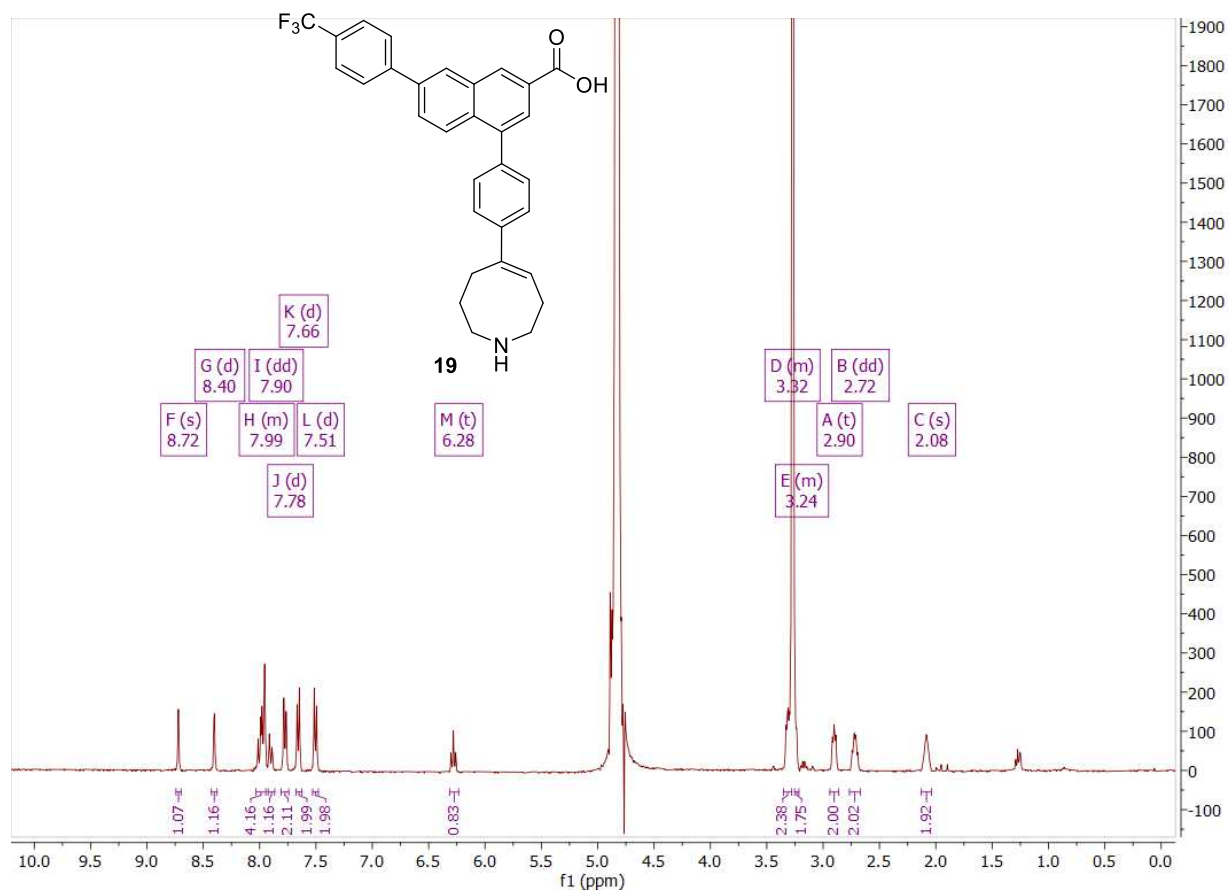

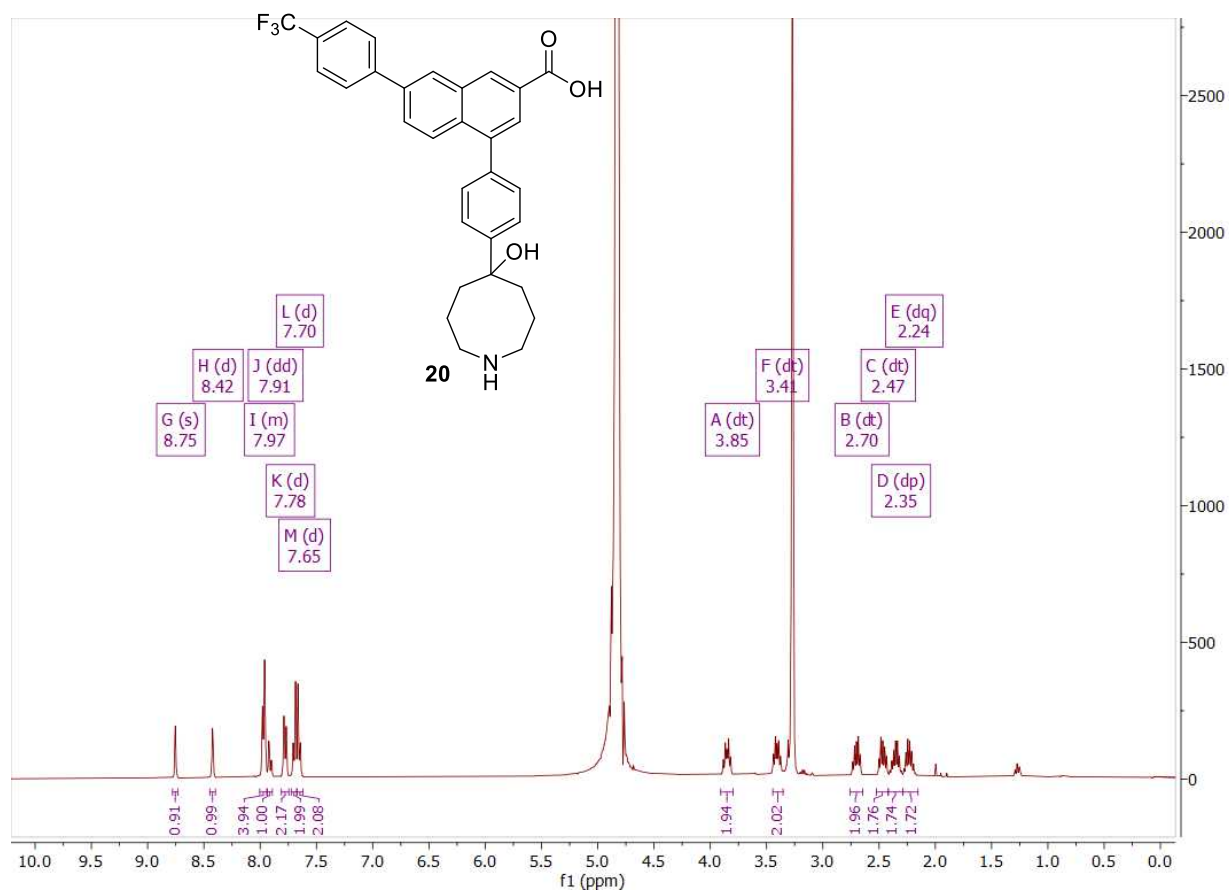

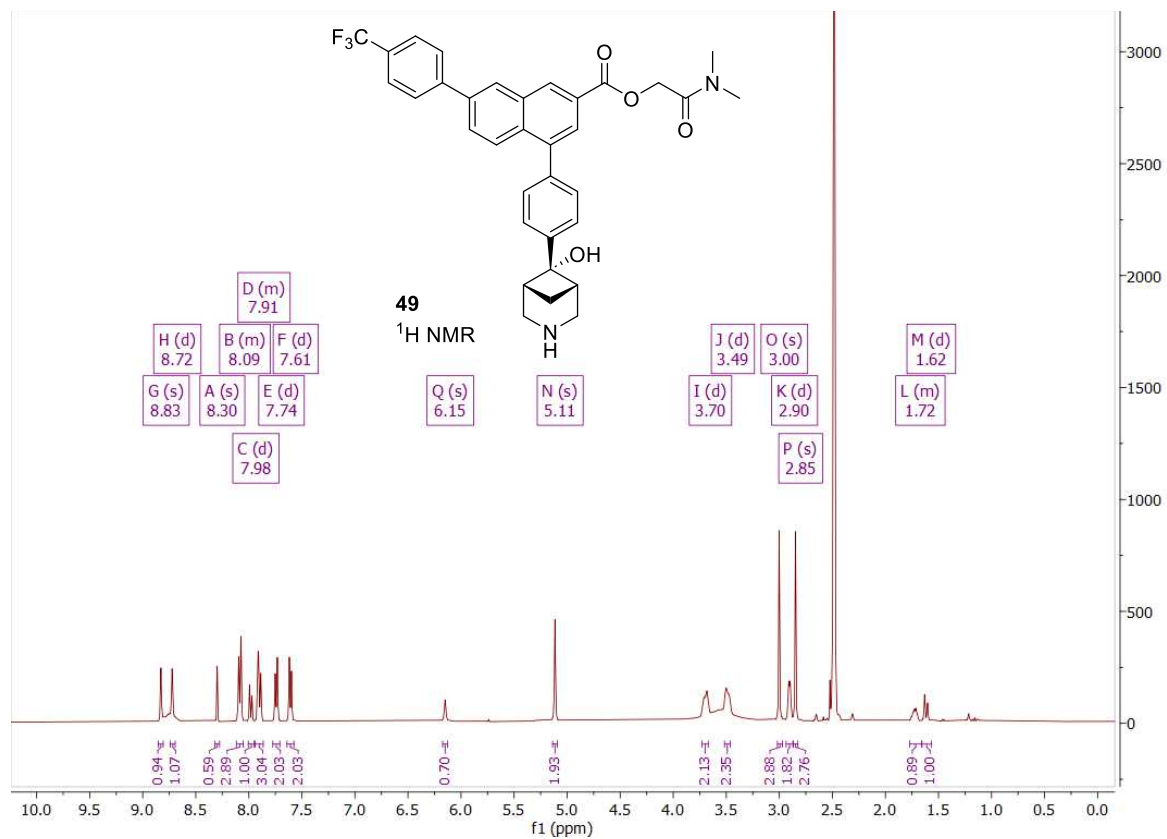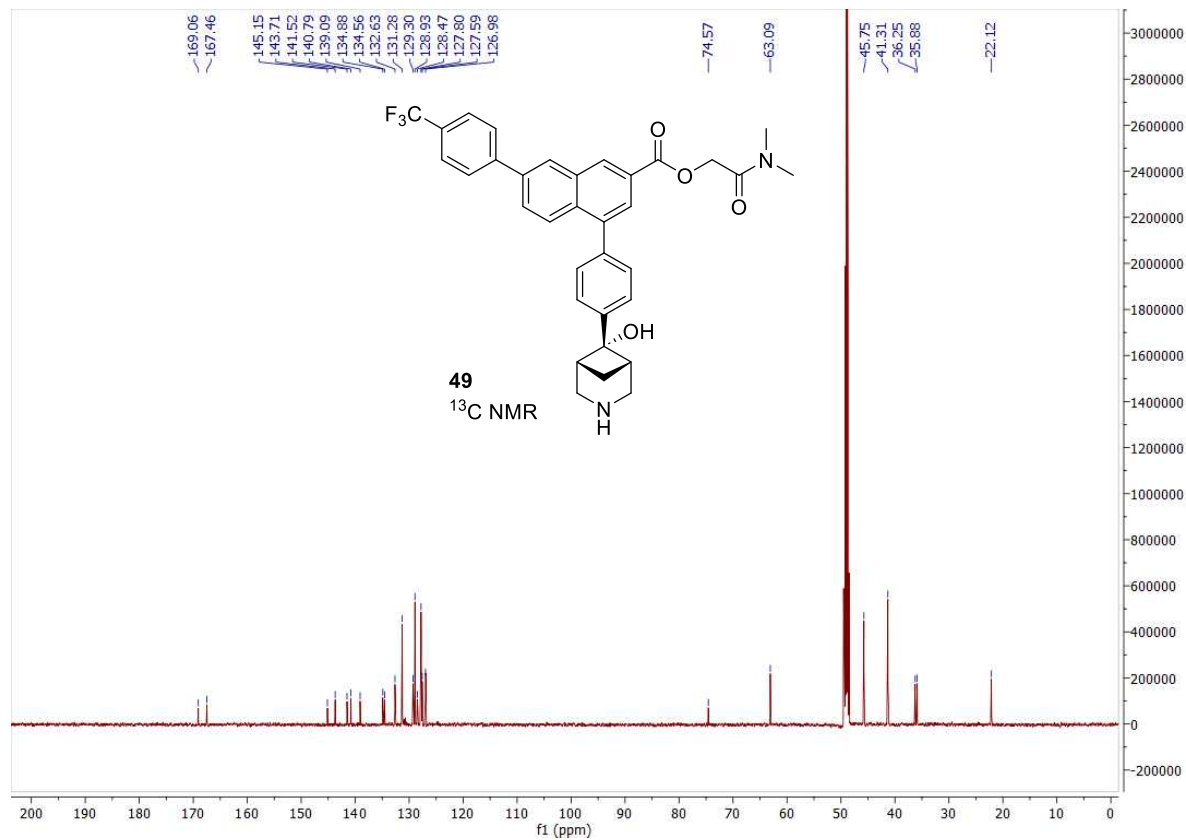

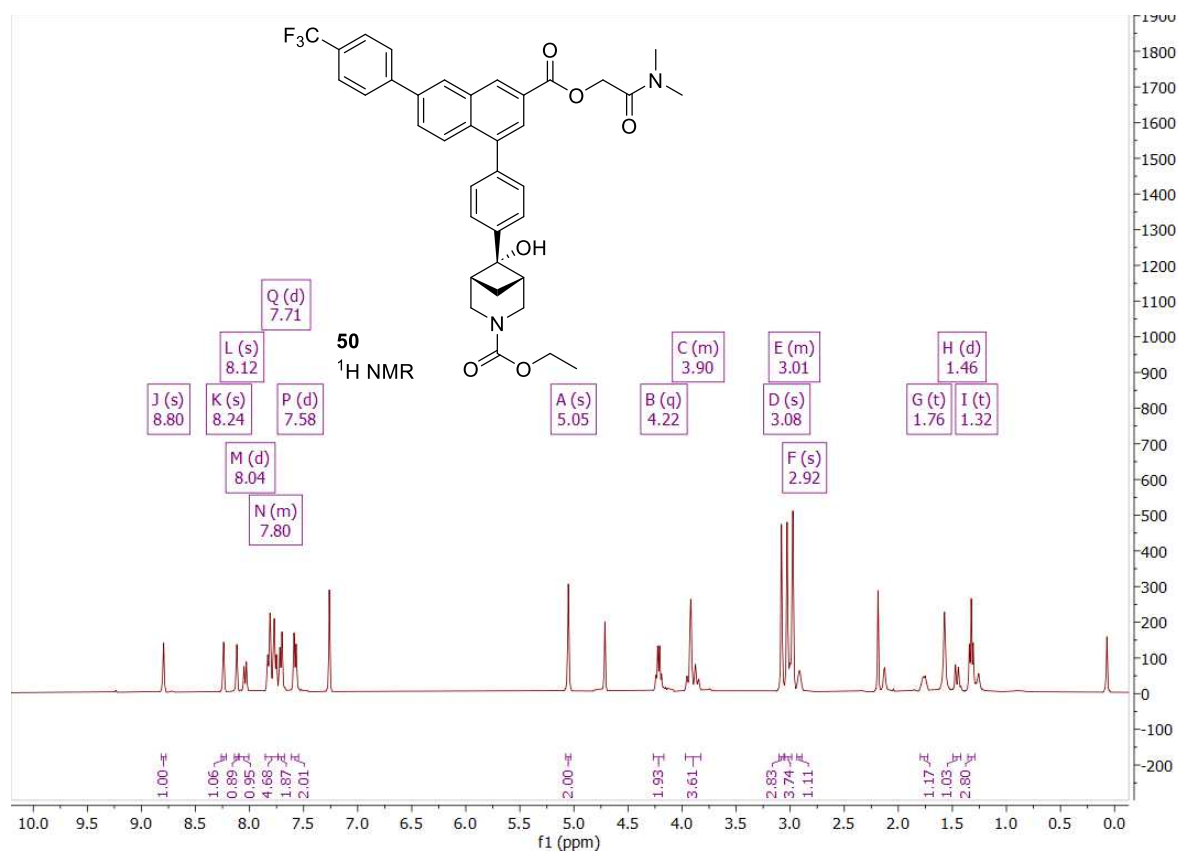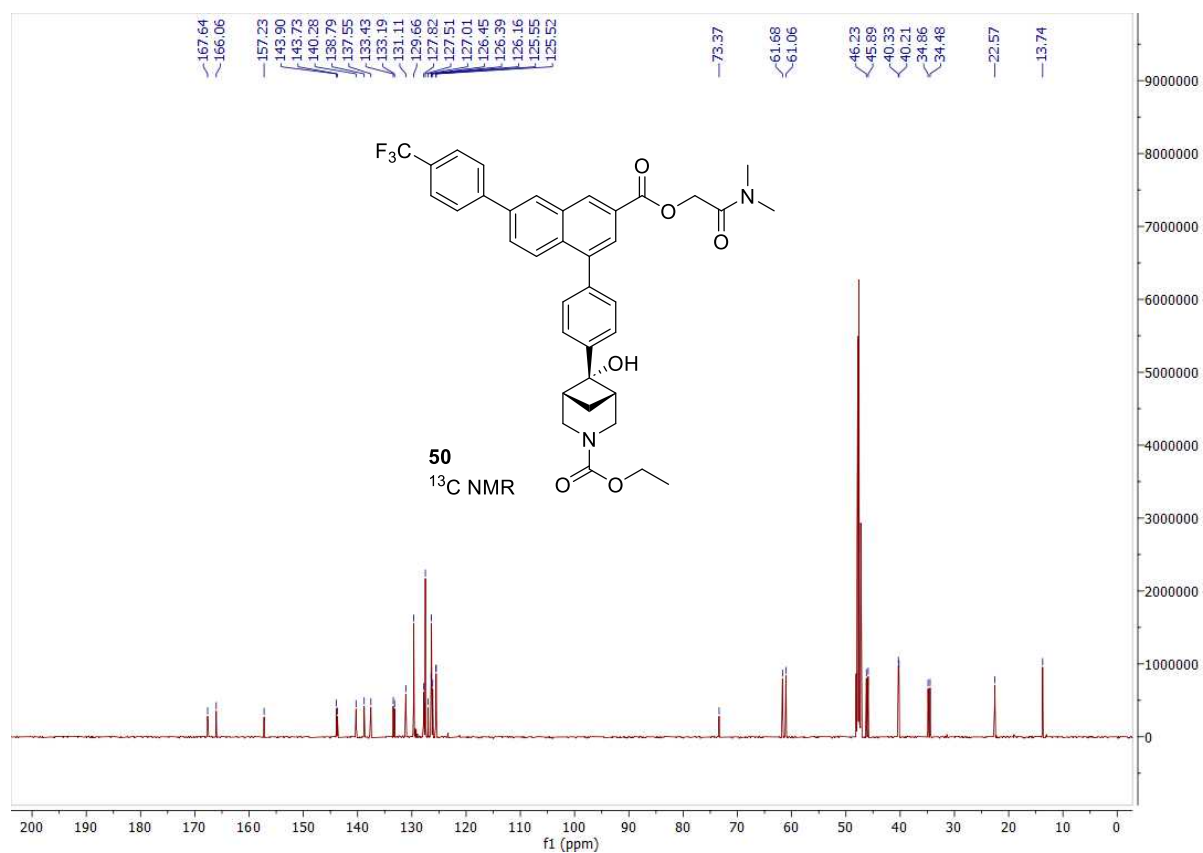

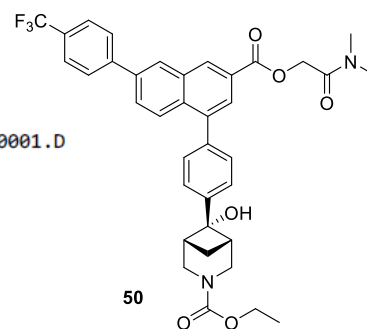

Data File C:\Chem32\1\Data\ZHIWEI\Zhiwei logP 2022-01-24 12-54-07\MRS4855000001.D  
 Sample Name: MRS4855

```

=====
Acq. Operator   : SYSTEM                      Seq. Line :    1
Acq. Instrument : hplc                       Location  :   71
Injection Date  : 1/24/2022 12:59:10 PM      Inj       :    1
                                           Inj Volume: 5.000 µl
Different Inj Volume from Sample Entry! Actual Inj Volume : 10.000 µl
Method          : C:\Chem32\1\Data\ZHIWEI\Zhiwei logP 2022-01-24 12-54-07\ZW_A10-100_B_20MIN.
                                           M (Sequence Method)
Last changed    : 1/24/2022 12:54:08 PM by SYSTEM
Additional Info : Peak(s) manually integrated
  
```

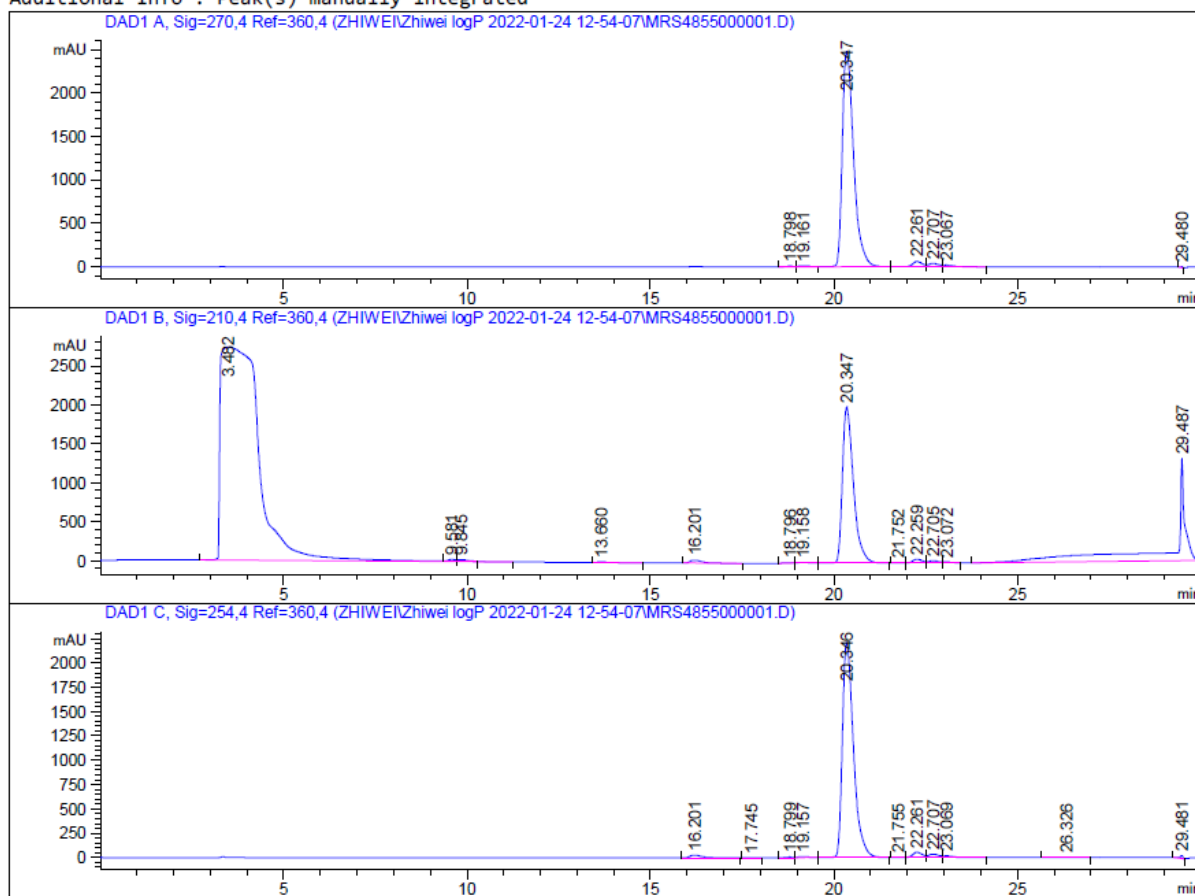

```

=====
                          Area Percent Report
=====

```

```

Sorted By      :      Signal
Multiplier    :      1.0000
Dilution     :      1.0000
Use Multiplier & Dilution Factor with ISTDs

```

Signal 1: DAD1 A, Sig=270,4 Ref=360,4

| Peak # | RetTime [min] | Type | Width [min] | Area [mAU*s] | Height [mAU] | Area %  |
|--------|---------------|------|-------------|--------------|--------------|---------|
| 1      | 18.798        | BV E | 0.2500      | 130.99969    | 8.12964      | 0.2354  |
| 2      | 19.161        | VV E | 0.3147      | 251.59396    | 12.29488     | 0.4520  |
| 3      | 20.347        | VB R | 0.3298      | 5.30192e4    | 2476.36938   | 95.2546 |
| 4      | 22.261        | BV   | 0.2830      | 1107.91040   | 60.10727     | 1.9905  |
| 5      | 22.707        | VV   | 0.2845      | 748.83679    | 39.26551     | 1.3454  |
| 6      | 23.067        | VB   | 0.2975      | 352.57422    | 17.61428     | 0.6334  |
| 7      | 29.480        | BB   | 0.0654      | 49.37229     | 10.78990     | 0.0887  |

Totals :                                    5.56605e4  2624.57086

Signal 2: DAD1 B, Sig=210,4 Ref=360,4

| Peak # | RetTime [min] | Type | Width [min] | Area [mAU*s] | Height [mAU] | Area %   |
|--------|---------------|------|-------------|--------------|--------------|----------|
| 1      | 3.482         | BV R | 0.8509      | 1.97137e5    | 2734.96924   | 72.0487  |
| 2      | 9.581         | VV E | 0.2243      | 306.19781    | 21.48454     | 0.1119   |
| 3      | 9.845         | VB E | 0.2795      | 352.82104    | 19.64821     | 0.1289   |
| 4      | 13.660        | BB   | 0.3759      | 211.32794    | 8.33208      | 0.0772   |
| 5      | 16.201        | BB   | 0.3542      | 893.71490    | 38.30293     | 0.3266   |
| 6      | 18.796        | BV   | 0.2453      | 96.13945     | 6.05408      | 0.0351   |
| 7      | 19.158        | VV   | 0.3128      | 203.25423    | 9.93058      | 0.0743   |
| 8      | 20.347        | VB   | 0.3194      | 4.16536e4    | 1996.61523   | 15.2234  |
| 9      | 21.752        | BB   | 0.2112      | 16.03680     | 1.23777      | 5.861e-3 |
| 10     | 22.259        | BV   | 0.2746      | 847.43774    | 48.31083     | 0.3097   |
| 11     | 22.705        | VV   | 0.2767      | 524.99493    | 28.52562     | 0.1919   |
| 12     | 23.072        | VB   | 0.2516      | 182.86534    | 11.25175     | 0.0668   |
| 13     | 29.487        | BBA  | 0.2947      | 3.11909e4    | 1305.54895   | 11.3995  |

Totals :                                    2.73616e5  6230.21181

Signal 3: DAD1 C, Sig=254,4 Ref=360,4

| Peak # | RetTime [min] | Type | Width [min] | Area [mAU*s] | Height [mAU] | Area % |
|--------|---------------|------|-------------|--------------|--------------|--------|
| 1      | 16.201        | BB   | 0.3493      | 610.64655    | 26.85579     | 1.2350 |
| 2      | 17.745        | BB   | 0.2606      | 23.68784     | 1.48099      | 0.0479 |

Sample Name: MRS4855

| Peak # | RetTime [min] | Type | Width [min] | Area [mAU*s] | Height [mAU] | Area %  |
|--------|---------------|------|-------------|--------------|--------------|---------|
| 3      | 18.799        | BV   | 0.2456      | 105.88486    | 6.72834      | 0.2142  |
| 4      | 19.157        | VB   | 0.3066      | 211.09714    | 10.58841     | 0.4269  |
| 5      | 20.346        | BB   | 0.3226      | 4.64127e4    | 2214.10156   | 93.8693 |
| 6      | 21.755        | BB   | 0.2143      | 18.20793     | 1.39447      | 0.0368  |
| 7      | 22.261        | BV   | 0.2741      | 909.28186    | 51.46049     | 1.8390  |
| 8      | 22.707        | VV   | 0.2817      | 631.48682    | 33.52936     | 1.2772  |
| 9      | 23.069        | VB   | 0.2831      | 276.31143    | 14.71497     | 0.5588  |
| 10     | 26.326        | BB   | 0.3806      | 47.40802     | 1.69365      | 0.0959  |
| 11     | 29.481        | BB   | 0.0823      | 197.25113    | 34.71066     | 0.3989  |

Totals :                   4.94440e4  2397.25868

=====  
\*\*\* End of Report \*\*\*

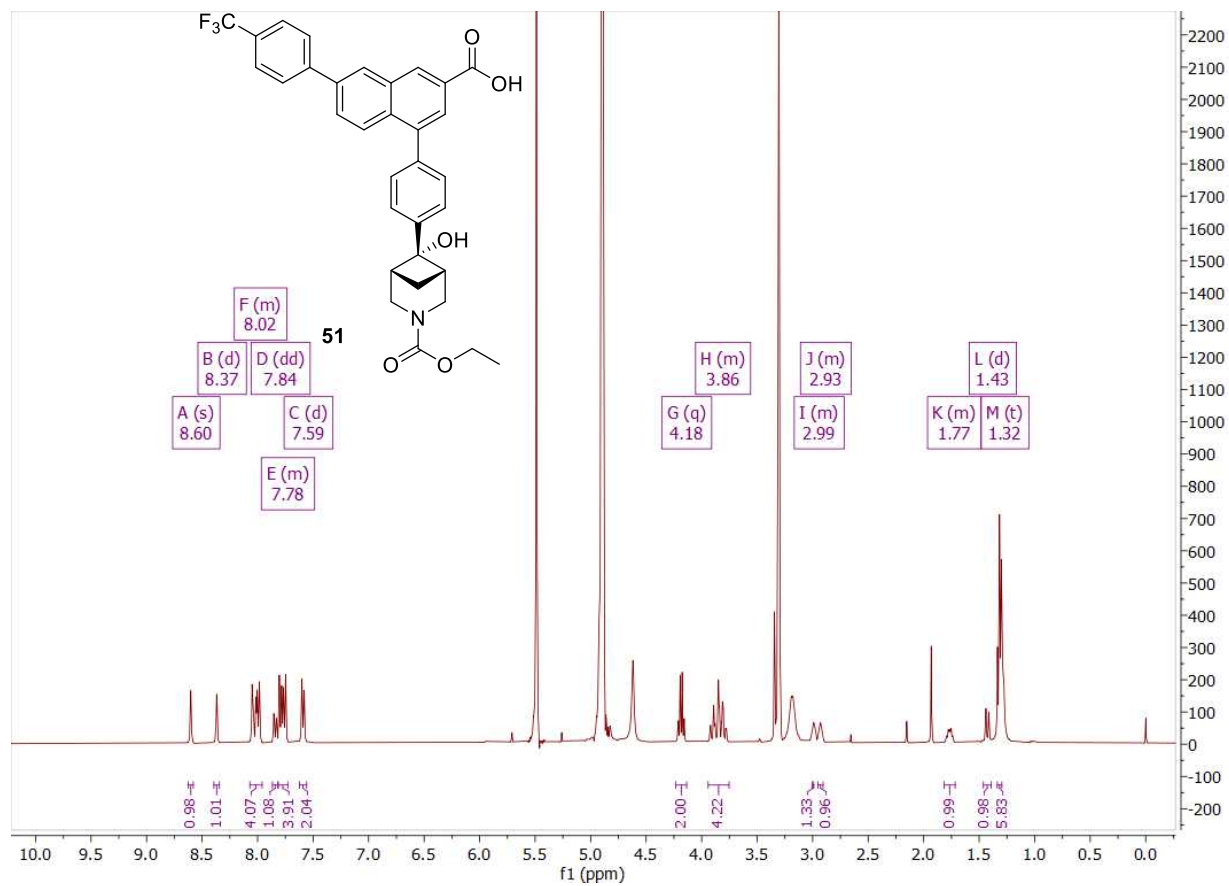



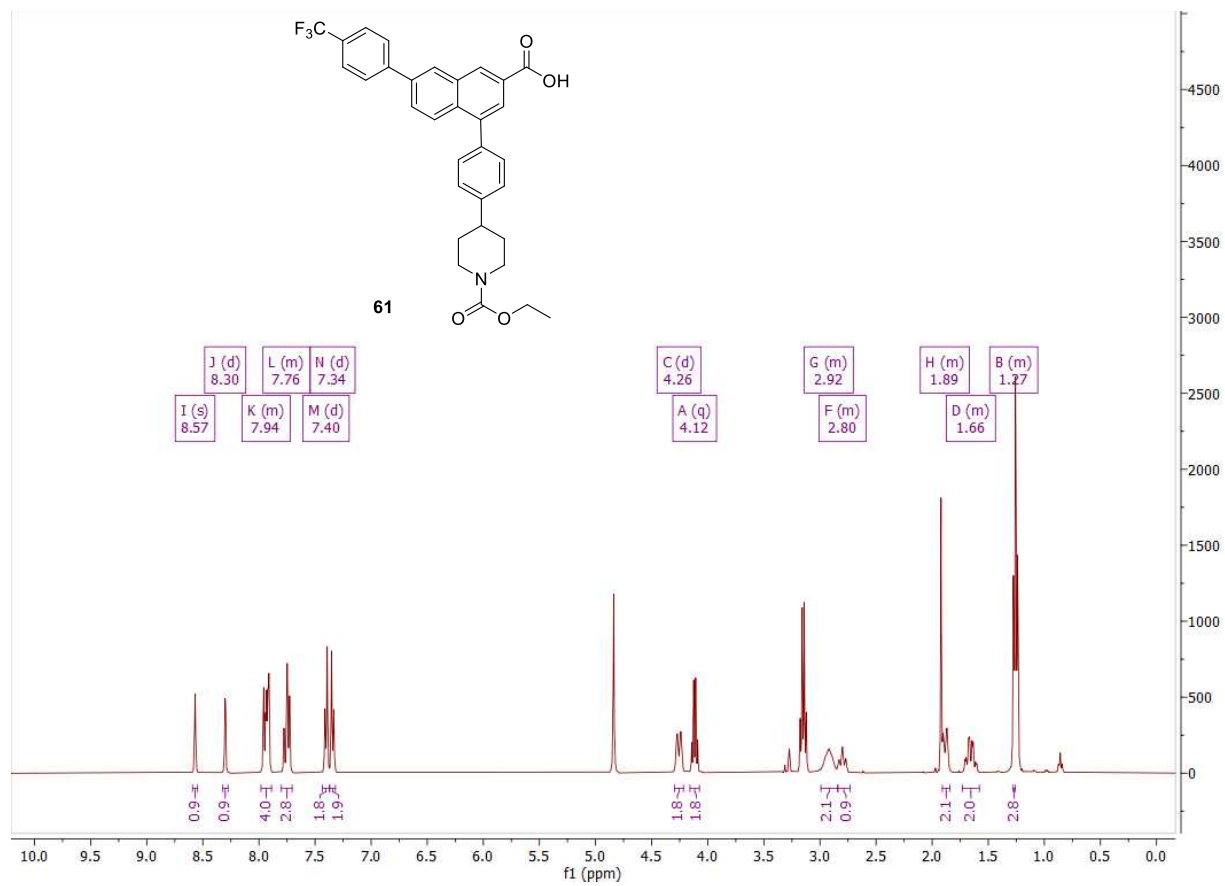

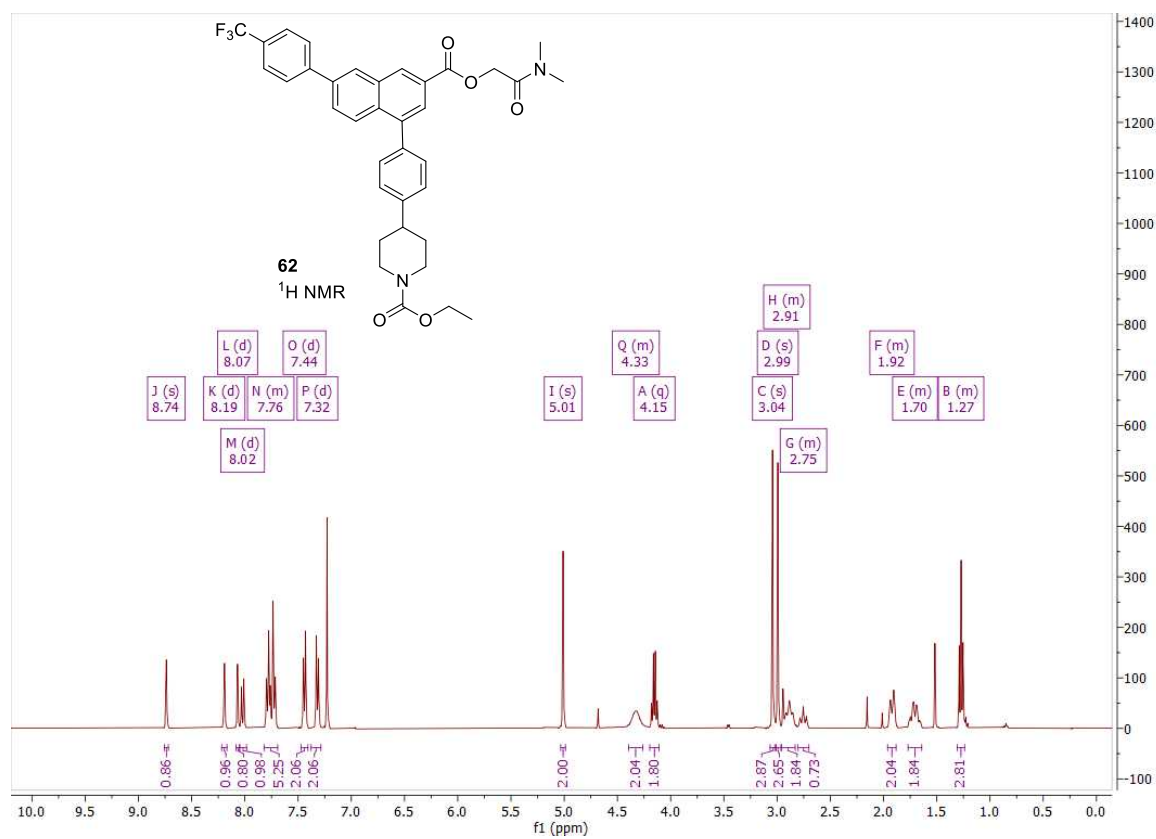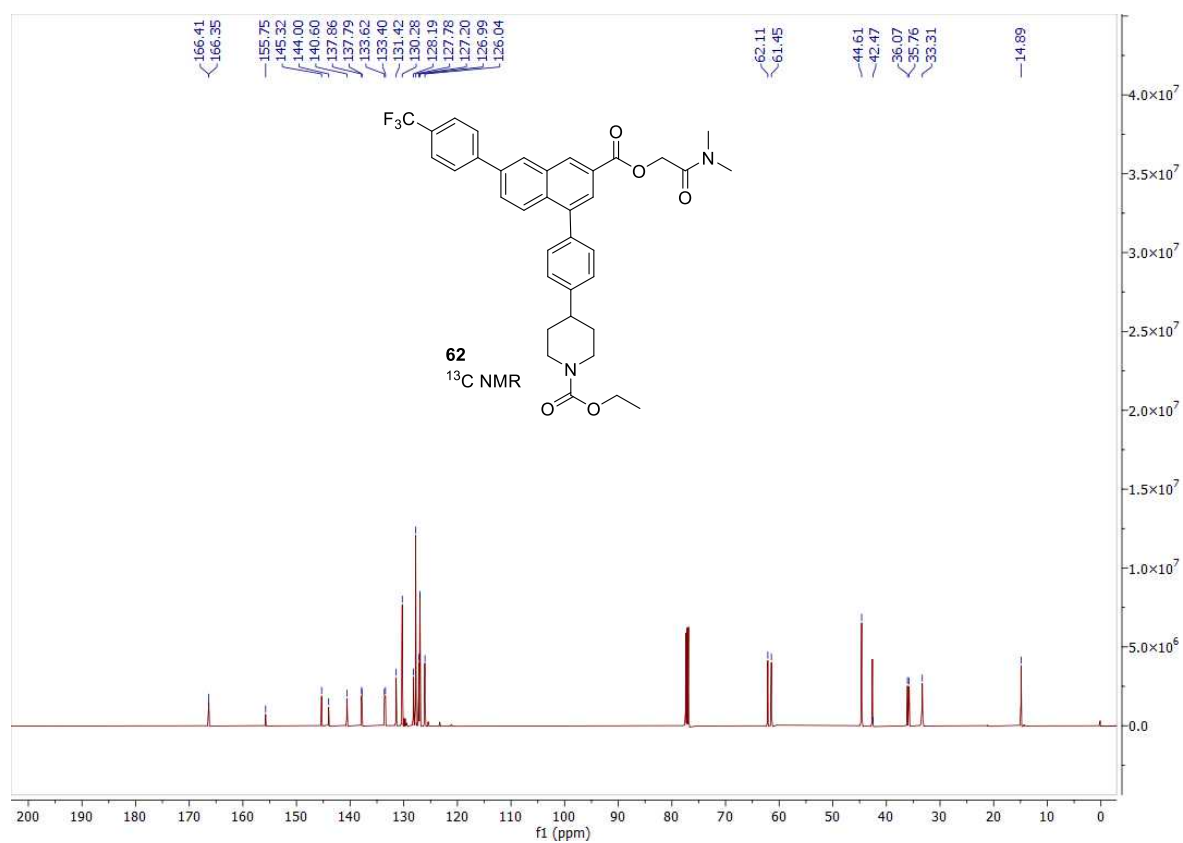

Data File C:\Chem32\1\Data\ZHIWEI\Zhiwei logP 2021-09-29 12-38-26\MRS4814000003.D

Sample Name: MRS4845

```
=====
Acq. Operator   : SYSTEM                      Seq. Line :    3
Acq. Instrument : hplc                       Location  :    3
Injection Date  : 9/29/2021 1:41:33 PM       Inj       :    1
                                                Inj Volume: 5.000 µl
Method          : C:\Chem32\1\Data\ZHIWEI\Zhiwei logP 2021-09-29 12-38-26\ZW_A60-100_B_20MIN.
                                                M (Sequence Method)
Last changed    : 9/29/2021 12:38:26 PM by SYSTEM
Additional Info : Peak(s) manually integrated
```

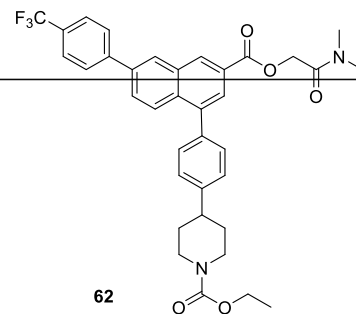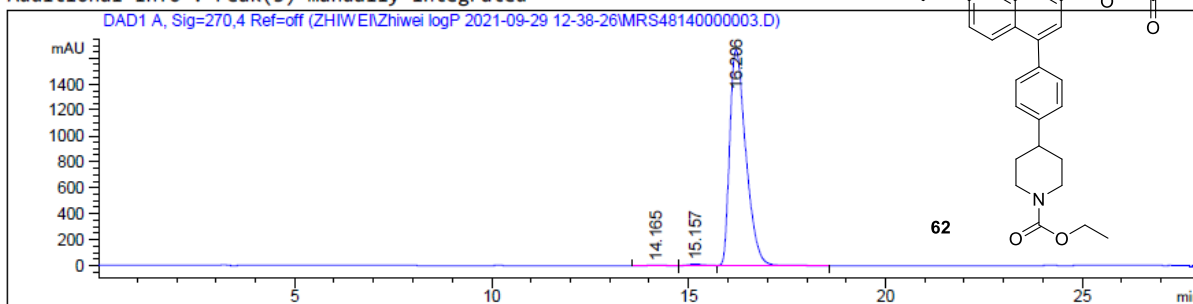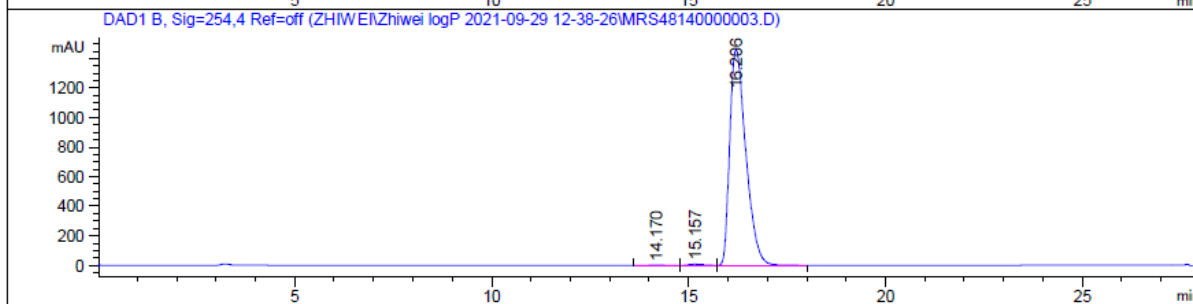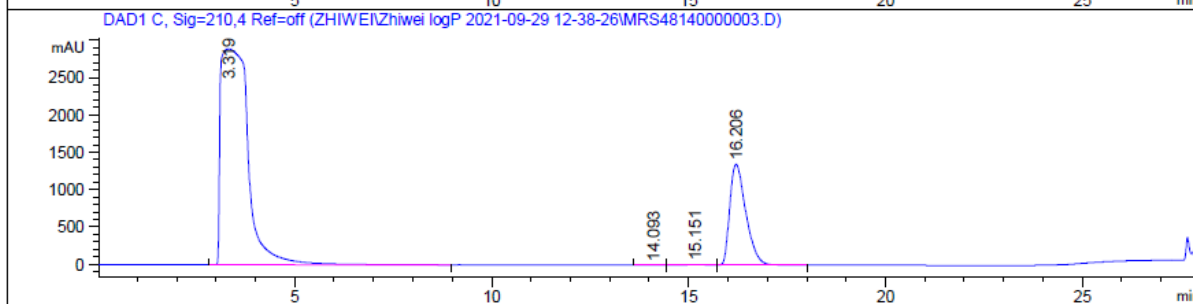

Data File C:\Chem32\1\Data\ZHIWEI\Zhiwei logP 2021-09-29 12-38-26\MRS4814000003.D  
 Sample Name: MRS4845

```

=====
                          Area Percent Report
=====
  
```

```

Sorted By      :      Signal
Multiplier     :      1.0000
Dilution      :      1.0000
Use Multiplier & Dilution Factor with ISTDs
  
```

Signal 1: DAD1 A, Sig=270,4 Ref=off

| Peak # | RetTime [min] | Type | Width [min] | Area [mAU*s] | Height [mAU] | Area %  |
|--------|---------------|------|-------------|--------------|--------------|---------|
| 1      | 14.165        | BB   | 0.4289      | 77.08664     | 2.76784      | 0.1615  |
| 2      | 15.157        | BV E | 0.4121      | 285.46634    | 10.60297     | 0.5980  |
| 3      | 16.206        | VB R | 0.4332      | 4.73704e4    | 1668.50854   | 99.2405 |

Totals :                    4.77329e4 1681.87936

Signal 2: DAD1 B, Sig=254,4 Ref=off

| Peak # | RetTime [min] | Type | Width [min] | Area [mAU*s] | Height [mAU] | Area %  |
|--------|---------------|------|-------------|--------------|--------------|---------|
| 1      | 14.170        | BB   | 0.4324      | 77.94099     | 2.80310      | 0.1866  |
| 2      | 15.157        | BV   | 0.4047      | 215.17343    | 8.13130      | 0.5150  |
| 3      | 16.206        | VB   | 0.4327      | 4.14852e4    | 1463.57800   | 99.2984 |

Totals :                    4.17783e4 1474.51240

Signal 3: DAD1 C, Sig=210,4 Ref=off

| Peak # | RetTime [min] | Type | Width [min] | Area [mAU*s] | Height [mAU] | Area %  |
|--------|---------------|------|-------------|--------------|--------------|---------|
| 1      | 3.319         | BB   | 0.5801      | 1.40381e5    | 2883.07837   | 78.4407 |
| 2      | 14.093        | BB   | 0.3257      | 32.66845     | 1.55102      | 0.0183  |
| 3      | 15.151        | BB   | 0.4345      | 263.81378    | 9.14764      | 0.1474  |
| 4      | 16.206        | BB   | 0.4329      | 3.82869e4    | 1349.72998   | 21.3936 |

Totals :                    1.78964e5 4243.50701

```

=====
*** End of Report ***
  
```

**Table S6.** Calculated ADMET properties, predicted using StarDrop software (v. 7.2, <https://www.optibrium.com/stardrop-installers/>),<sup>8,9</sup> supplied by Optibrium (Cambridge, UK). Related to structures shown in Table 1.

| Compound                       | 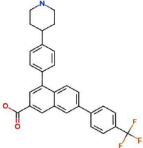 |  |  |  |  |  |
|--------------------------------|-----------------------------------------------------------------------------------|-----------------------------------------------------------------------------------|-----------------------------------------------------------------------------------|-----------------------------------------------------------------------------------|-------------------------------------------------------------------------------------|-------------------------------------------------------------------------------------|
| Compound                       | 1                                                                                 | 2a                                                                                | 2b                                                                                | 5                                                                                 | 6                                                                                   | 7                                                                                   |
| FlexX Score ORMA UNK__1        | -                                                                                 | -                                                                                 | -                                                                                 | -                                                                                 | -                                                                                   | -                                                                                   |
| IC50 (nM) human P2Y14 receptor | 7.96                                                                              | 20                                                                                | 3.11                                                                              | 65.9                                                                              | 46.6                                                                                | 9.69                                                                                |
| pIC50, P2Y14R                  | 8.099                                                                             | 7.699                                                                             | 8.507                                                                             | 7.181                                                                             | 7.332                                                                               | 8.014                                                                               |
| Most Acidic pKa                | 5.7                                                                               | 5.6                                                                               | 5.8                                                                               | -                                                                                 | 6.2                                                                                 | 6.1                                                                                 |
| Most Basic pKa                 | 8.3                                                                               | 8.5                                                                               | 8.7                                                                               | -                                                                                 | 8.4                                                                                 | 8.7                                                                                 |
| All pKas                       | Acidic pKa 1: 5.7, Basic pKa 1: 8.3                                               | Acidic pKa 1: 5.6, Basic pKa 1: 8.5                                               | Acidic pKa 1: 5.8, Basic pKa 1: 8.7                                               | -                                                                                 | Acidic pKa 1: 6.2, Basic pKa 1: 8.4                                                 | Acidic pKa 1: 6.1, Basic pKa 1: 8.7                                                 |
| logS                           | -0.006678                                                                         | -1.014                                                                            | -0.3407                                                                           | 0.2823                                                                            | -0.3099                                                                             | 0.0541                                                                              |
| <b>logS @ pH7.4</b>            | <b>2.391</b>                                                                      | <b>1.089</b>                                                                      | <b>2.265</b>                                                                      | <b>2.529</b>                                                                      | <b>2.165</b>                                                                        | <b>2.458</b>                                                                        |
| logD                           | 2.866                                                                             | 3.508                                                                             | 2.946                                                                             | 2.706                                                                             | 3.053                                                                               | 2.898                                                                               |
| 2C9 pKi                        | 5.935                                                                             | 6.097                                                                             | 6.087                                                                             | 5.903                                                                             | 6.076                                                                               | 5.886                                                                               |
| hERG pIC50                     | 5.259                                                                             | 6.069                                                                             | 5.225                                                                             | 4.964                                                                             | 5.286                                                                               | 5.324                                                                               |
| BBB log([brain]:[blood])       | -0.8669                                                                           | -0.5774                                                                           | -0.874                                                                            | -0.8687                                                                           | -0.7818                                                                             | -0.7173                                                                             |
| BBB category                   | +                                                                                 | +                                                                                 | +                                                                                 | +                                                                                 | +                                                                                   | +                                                                                   |
| HIA category                   | +                                                                                 | +                                                                                 | +                                                                                 | +                                                                                 | +                                                                                   | +                                                                                   |
| P-gp category                  | yes                                                                               | yes                                                                               | yes                                                                               | yes                                                                               | yes                                                                                 | yes                                                                                 |
| 2D6 affinity category          | medium                                                                            | high                                                                              | very high                                                                         | medium                                                                            | medium                                                                              | high                                                                                |
| PPB90 category                 | high                                                                              | high                                                                              | high                                                                              | high                                                                              | high                                                                                | high                                                                                |
| <b>logP</b>                    | <b>2.518</b>                                                                      | <b>6.548</b>                                                                      | <b>2.728</b>                                                                      | <b>2.114</b>                                                                      | <b>2.62</b>                                                                         | <b>2.278</b>                                                                        |
| MW                             | 475.5                                                                             | 501.5                                                                             | 487.5                                                                             | 447.4                                                                             | 487.5                                                                               | 485.5                                                                               |
| HBD                            | 2                                                                                 | 1                                                                                 | 2                                                                                 | 2                                                                                 | 2                                                                                   | 2                                                                                   |
| HBA                            | 3                                                                                 | 3                                                                                 | 3                                                                                 | 3                                                                                 | 3                                                                                   | 3                                                                                   |
| TPSA                           | 49.33                                                                             | 40.54                                                                             | 49.33                                                                             | 49.33                                                                             | 49.33                                                                               | 49.33                                                                               |
| Flexibility                    | 0.1282                                                                            | 0.119                                                                             | 0.122                                                                             | 0.1351                                                                            | 0.122                                                                               | 0.122                                                                               |
| Rotatable Bonds                | 5                                                                                 | 5                                                                                 | 5                                                                                 | 5                                                                                 | 5                                                                                   | 5                                                                                   |

| Compound                       | 8                                                            | 9            | 10                                        | 11           | 12                                        | 13                                        |
|--------------------------------|--------------------------------------------------------------|--------------|-------------------------------------------|--------------|-------------------------------------------|-------------------------------------------|
| FlexX Score ORMA UNK__1        | -                                                            | -            | -                                         | -            | -                                         | -                                         |
| IC50 (nM) human P2Y14 receptor | 20.8                                                         | 46.5         | 31.5                                      | 9.48         | 16.6                                      | 32                                        |
| pIC50, P2Y14R                  | 7.682                                                        | 7.333        | 7.502                                     | 8.023        | 7.78                                      | 7.495                                     |
| Most Acidic pKa                | 5.9                                                          | -            | 5.2                                       | -            | 6.2                                       | 3.8                                       |
| Most Basic pKa                 | 8.3                                                          | -            | 8.8                                       | -            | 8.5                                       | 9.2                                       |
| All pKas                       | Acidic pKa 1: 5.9,<br>Acidic pKa 2: 5.7,<br>Basic pKa 1: 8.3 | -            | Acidic pKa 1:<br>5.2,<br>Basic pKa 1: 8.8 | -            | Acidic pKa 1:<br>6.2,<br>Basic pKa 1: 8.5 | Acidic pKa 1:<br>3.8,<br>Basic pKa 1: 9.2 |
| logS                           | 0.231                                                        | -0.185       | 0.1345                                    | 0.1514       | -0.3245                                   | -0.3706                                   |
| <b>logS @ pH7.4</b>            | <b>2.436</b>                                                 | <b>2.41</b>  | <b>2.451</b>                              | <b>2.322</b> | <b>2.334</b>                              | <b>2.053</b>                              |
| logD                           | 2.165                                                        | 2.65         | 2.802                                     | 2.354        | 3.085                                     | 3.121                                     |
| 2C9 pKi                        | 6.122                                                        | 6.184        | 5.979                                     | 6.12         | 6.223                                     | 6.117                                     |
| hERG pIC50                     | 4.89                                                         | 5.039        | 5.114                                     | 4.885        | 5.395                                     | 5.243                                     |
| BBB<br>log([brain]:[blood])    | -0.9536                                                      | -0.835       | -0.8689                                   | -1.077       | -0.6427                                   | -0.8766                                   |
| BBB category                   | -                                                            | -            | +                                         | -            | +                                         | +                                         |
| HIA category                   | +                                                            | +            | +                                         | +            | +                                         | +                                         |
| P-gp category                  | yes                                                          | yes          | yes                                       | yes          | yes                                       | yes                                       |
| 2D6 affinity category          | high                                                         | high         | medium                                    | high         | medium                                    | very high                                 |
| PPB90 category                 | high                                                         | high         | high                                      | high         | high                                      | high                                      |
| <b>logP</b>                    | <b>1.954</b>                                                 | <b>2.396</b> | <b>2.314</b>                              | <b>2.174</b> | <b>2.706</b>                              | <b>2.852</b>                              |
| MW                             | 503.5                                                        | 517.5        | 461.5                                     | 517.5        | 499.5                                     | 501.5                                     |
| HBD                            | 3                                                            | 2            | 2                                         | 3            | 2                                         | 2                                         |
| HBA                            | 4                                                            | 4            | 3                                         | 4            | 3                                         | 3                                         |
| TPSA                           | 69.56                                                        | 58.56        | 49.33                                     | 69.56        | 49.33                                     | 49.33                                     |
| Flexibility                    | 0.119                                                        | 0.1395       | 0.1316                                    | 0.1163       | 0.119                                     | 0.119                                     |
| Rotatable Bonds                | 5                                                            | 6            | 5                                         | 5            | 5                                         | 5                                         |

| Compound                       | 14                                  | 15                                                     | 16                                  | 17                                  | 18                                  | 19           |
|--------------------------------|-------------------------------------|--------------------------------------------------------|-------------------------------------|-------------------------------------|-------------------------------------|--------------|
| FlexX Score ORMA UNK__1        | -                                   | -30                                                    | -                                   | -                                   | -                                   | -            |
| IC50 (nM) human P2Y14 receptor | 524                                 | 5.92                                                   | 9.58                                | 11.9                                | 18.5                                | 58.4         |
| pIC50, P2Y14R                  | 6.281                               | 8.228                                                  | 8.019                               | 7.924                               | 7.733                               | 7.234        |
| Most Acidic pKa                | 5.1                                 | 4.6                                                    | 5.7                                 | 5.9                                 | 5.7                                 | -            |
| Most Basic pKa                 | 8.4                                 | 8.8                                                    | 8.1                                 | 8.2                                 | 8.1                                 | -            |
| All pKas                       | Acidic pKa 1: 5.1, Basic pKa 1: 8.4 | Acidic pKa 1: 4.6, Acidic pKa 2: 5.3, Basic pKa 1: 8.8 | Acidic pKa 1: 5.7, Basic pKa 1: 8.1 | Acidic pKa 1: 5.9, Basic pKa 1: 8.2 | Acidic pKa 1: 5.7, Basic pKa 1: 8.1 | -            |
| logS                           | -0.2738                             | 0.2897                                                 | -0.148                              | -0.07885                            | -0.2834                             | -0.2141      |
| <b>logS @ pH7.4</b>            | <b>2.116</b>                        | <b>2.306</b>                                           | <b>2.291</b>                        | <b>2.522</b>                        | <b>2.201</b>                        | <b>2.424</b> |
| logD                           | 3.081                               | 2.365                                                  | 2.977                               | 2.865                               | 3.083                               | 2.989        |
| 2C9 pKi                        | 6.073                               | 6.152                                                  | 6.124                               | 6.171                               | 5.673                               | 6.134        |
| hERG pIC50                     | 5.151                               | 4.774                                                  | 5.38                                | 5.476                               | 5.497                               | 5.599        |
| BBB log([brain]:[blood])       | -0.8783                             | -1.082                                                 | -0.8614                             | -0.6212                             | -0.854                              | -0.6156      |
| BBB category                   | +                                   | -                                                      | +                                   | +                                   | +                                   | +            |
| HIA category                   | +                                   | +                                                      | +                                   | +                                   | +                                   | +            |
| P-gp category                  | yes                                 | yes                                                    | yes                                 | yes                                 | yes                                 | yes          |
| 2D6 affinity category          | very high                           | high                                                   | medium                              | high                                | medium                              | high         |
| PPB90 category                 | high                                | high                                                   | high                                | high                                | high                                | high         |
| <b>logP</b>                    | <b>2.646</b>                        | <b>1.973</b>                                           | <b>2.728</b>                        | <b>2.585</b>                        | <b>2.939</b>                        | <b>2.79</b>  |
| MW                             | 487.5                               | 503.5                                                  | 489.5                               | 487.5                               | 503.6                               | 501.5        |
| HBD                            | 2                                   | 3                                                      | 2                                   | 2                                   | 2                                   | 2            |
| HBA                            | 3                                   | 4                                                      | 3                                   | 3                                   | 3                                   | 3            |
| TPSA                           | 49.33                               | 69.56                                                  | 49.33                               | 49.33                               | 49.33                               | 49.33        |
| Flexibility                    | 0.122                               | 0.119                                                  | 0.125                               | 0.125                               | 0.122                               | 0.122        |
| Rotatable Bonds                | 5                                   | 5                                                      | 5                                   | 5                                   | 5                                   | 5            |

| Compound                       | 20           | 49           | 50                | 51                                      | 53                                                                                                                          | 54                                     |
|--------------------------------|--------------|--------------|-------------------|-----------------------------------------|-----------------------------------------------------------------------------------------------------------------------------|----------------------------------------|
| FlexX Score ORMA UNK_1         | -            | -            | -                 | -                                       | -                                                                                                                           | -                                      |
| IC50 (nM) human P2Y14 receptor | 1780         | 4810         |                   | 81.6                                    | 2.59e+04                                                                                                                    |                                        |
| pIC50, P2Y14R                  | 5.75         | 5.318        |                   | 7.088                                   | 4.587                                                                                                                       |                                        |
| Most Acidic pKa                | -            | -            | 8.4               | 3.5                                     | 3.8                                                                                                                         | 5.7                                    |
| Most Basic pKa                 | -            | -            | N/A               | N/A                                     | 7.7                                                                                                                         | 8                                      |
| All pKas                       | -            | -            | Acidic pKa 1: 8.4 | Acidic pKa 1: 3.5,<br>Acidic pKa 2: 8.3 | Acidic pKa 1: 3.8,<br>Acidic pKa 2: 4.7,<br>Basic pKa 1: 7.7,<br>Basic pKa 2: 6.8,<br>Basic pKa 2: 6.8,<br>Basic pKa 2: 6.9 | Acidic pKa 1: 5.7,<br>Basic pKa 1: 8.0 |
| logS                           | 0.2738       | 0.7176       | -0.3775           | -1.346                                  | -1.324                                                                                                                      | -1.264                                 |
| <b>logS @ pH7.4</b>            | <b>2.49</b>  | <b>1.738</b> | <b>-0.3775</b>    | <b>1.302</b>                            | <b>3.155</b>                                                                                                                | <b>0.9025</b>                          |
| logD                           | 2.223        | 3.329        | 5.386             | 3.274                                   | 3.56                                                                                                                        | 4.277                                  |
| 2C9 pKi                        | 5.683        | 6.116        | 5.97              | 6.189                                   | 5.548                                                                                                                       | 5.553                                  |
| hERG pIC50                     | 5.116        | 6.333        | 6.085             | 5.313                                   | 6.411                                                                                                                       | 6.578                                  |
| BBB log([brain]:[blood])       | -1.062       | 0.291        | -0.9526           | -1.235                                  | -1.46                                                                                                                       | -0.5531                                |
| BBB category                   | -            | -            | -                 | -                                       | -                                                                                                                           | +                                      |
| HIA category                   | +            | +            | +                 | +                                       | +                                                                                                                           | +                                      |
| P-gp category                  | yes          | yes          | yes               | yes                                     | yes                                                                                                                         | yes                                    |
| 2D6 affinity category          | high         | high         | high              | high                                    | high                                                                                                                        | medium                                 |
| PPB90 category                 | high         | high         | high              | high                                    | high                                                                                                                        | high                                   |
| <b>logP</b>                    | <b>2.273</b> | <b>4.879</b> | <b>5.386</b>      | <b>6.037</b>                            | <b>3.325</b>                                                                                                                | <b>8.324</b>                           |
| MW                             | 519.6        | 588.6        | 660.7             | 575.6                                   | 1178                                                                                                                        | 555.6                                  |
| HBD                            | 3            | 2            | 1                 | 2                                       | 4                                                                                                                           | 1                                      |
| HBA                            | 4            | 6            | 8                 | 6                                       | 12                                                                                                                          | 3                                      |
| TPSA                           | 69.56        | 78.87        | 96.38             | 87.07                                   | 140.9                                                                                                                       | 40.54                                  |
| Flexibility                    | 0.119        | 0.1875       | 0.2264            | 0.1702                                  | 0.2268                                                                                                                      | 0.2222                                 |
| Rotatable Bonds                | 5            | 9            | 12                | 8                                       | 22                                                                                                                          | 10                                     |



| Compound                       | 57                                                                               | 58           | 62             | 63               | 64            |
|--------------------------------|----------------------------------------------------------------------------------|--------------|----------------|------------------|---------------|
| FlexX Score ORMA UNK_1         | -                                                                                | -            | -              | -                | -             |
| IC50 (nM) human P2Y14 receptor | 424                                                                              | 67.4         | -              | -                | -             |
| pIC50, P2Y14R                  | 6.373                                                                            | 7.171        |                |                  |               |
| Most Acidic pKa                | 2.5                                                                              | -            | N/A            | N/A              | -             |
| Most Basic pKa                 | 8                                                                                | -            | N/A            | 9.2              | -             |
| All pKas                       | Acidic pKa 1: 2.5,<br>Basic pKa 1: 8.0,<br>Basic pKa 2: 5.6,<br>Basic pKa 2: 7.2 | -            | N/A            | Basic pKa 1: 9.2 | -             |
| logS                           | -1.174                                                                           | -0.2279      | -0.7504        | 0.1255           | -1.003        |
| <b>logS @ pH7.4</b>            | <b>1.313</b>                                                                     | <b>1.65</b>  | <b>-0.7504</b> | <b>1.675</b>     | <b>-1.003</b> |
| logD                           | 4.301                                                                            | 3.661        | 6.407          | 3.996            | 6.531         |
| 2C9 pKi                        | 5.441                                                                            | 5.495        | 5.966          | 6.098            | 5.923         |
| hERG pIC50                     | 7.269                                                                            | 6.889        | 6.65           | 6.8              | 6.56          |
| BBB log([brain]:[blood])       | -1.06                                                                            | -1.08        | -0.595         | 0.5016           | -0.6635       |
| BBB category                   | -                                                                                | -            | -              | -                | -             |
| HIA category                   | +                                                                                | +            | +              | +                | +             |
| P-gp category                  | yes                                                                              | yes          | yes            | yes              | yes           |
| 2D6 affinity category          | high                                                                             | high         | medium         | very high        | very high     |
| PPB90 category                 | high                                                                             | high         | high           | high             | high          |
| <b>logP</b>                    | <b>8.505</b>                                                                     | <b>5.815</b> | <b>6.407</b>   | <b>6.004</b>     | <b>6.531</b>  |
| MW                             | 797.9                                                                            | 697.8        | 632.7          | 572.6            | 644.7         |
| HBD                            | 2                                                                                | 2            | 0              | 1                | 0             |
| HBA                            | 9                                                                                | 7            | 7              | 5                | 7             |
| TPSA                           | 109.6                                                                            | 97.27        | 76.15          | 58.64            | 76.15         |
| Flexibility                    | 0.3175                                                                           | 0.2857       | 0.24           | 0.1915           | 0.2308        |
| Rotatable Bonds                | 20                                                                               | 16           | 12             | 9                | 12            |

## References:

1. Zhou, M.; Wang, W.; Wang, Z.; Wang, Y.; Zhu, Y.; Lin, Z.; Tian, S.; Huang, Y.; Hu, Q.; Li, H. Discovery and computational studies of 2-phenyl-benzoxazole acetamide derivatives as promising P2Y<sub>14</sub>R antagonists with anti-gout potential. *Eur. J. Med. Chem.* **2022**, 227:113933, doi: <https://doi.org/10.1016/j.ejmech.2021.113933>.
2. Kiselev, E.; Barrett, M.O.; Katritch, V.; Paoletta, S.; Weitzer, C.D.; Brown, K.A.; Hammes, E.; Yin, A.L.; Zhao, Q.; Stevens, R.C.; Harden, T.K.; Jacobson, K.A. Exploring a 2-naphthoic acid template for the structure-based design of P2Y<sub>14</sub> receptor antagonist molecular probes. *ACS Chem. Biol.* **2014**, 9, 2833–2842.
3. Kerns, E. H.; Di, L.; Petusky, S.; Kleintop, T.; Huryn, D.; McConnell, O.; Carter, G., Pharmaceutical profiling method for lipophilicity and integrity using liquid chromatography–mass spectrometry. *J. Chromatogr. B* **2003**, 791, 381-388.
4. Besnard, J.; Ruda, G. F.; Setola, V.; Abecassis, K.; Rodriguiz, R. M.; Huang, X. P.; Norval, S.; Sassano, M. F.; Shin, A. I.; Webster, L. A.; Simeons, F. R.; Stojanovski, L.; Prat, A.; Seidah, N. G.; Constam, D. B.; Bickerton, G. R.; Read, K. D.; Wetsel, W. C.; Gilbert, I. H.; Roth, B. L.; Hopkins, A. L. Automated design of ligands to polypharmacological profiles. *Nature* **2012**, 492, 215–220.
5. Wen, Z.; Salmaso, V.; Jung, Y.-H.; Phung, N. B.; Gopinath, V.; Shah, Q.; Patterson, A. T.; Randle, J. C. R.; Chen, Z.; Salvemini, D.; Lieberman, D. I.; Whitehead, G. S.; Karcz, T. P.; Cook, D. N.; Jacobson, K. A. Bridged piperidine analogues of a high affinity naphthalene-based P2Y<sub>14</sub>R antagonist. *J. Med. Chem.* **2022**, 65, 3434–3459, doi: 10.1021/acs.jmedchem.1c01964.
6. Fallot, L. B.; Suresh, R. R.; Fisher, C. L.; Salmaso, V.; O'Connor, R. D.; Kaufman, N.; Gao, Z. G.; Auchampach, J. A.; Jacobson, K. A. Structure activity studies of 1*H*-imidazo[4,5-*c*]quinolin-4-amine derivatives as A<sub>3</sub> adenosine receptor positive allosteric modulators. *J. Med. Chem.* **2022**, 65(22), 15238–15262, <https://doi.org/10.1021/acs.jmedchem.2c01170>
7. a) Bohl, S.; Medway, D. J.; Schulz-Menger, J.; Schneider, J. E.; Neubauer, S.; Lygate, C. A. Refined approach for quantification of in vivo ischemia and reperfusion injury in the mouse

- heart. *Am. J. Physiol. Heart Circ. Physiol.* **2009**, *297*, H2054-H2058. b) Liu, W.; Cronin, C.; Cao, Z.; Wang, C.; Ruan, J.; Pulikkot, S.; Hall, A.; Sun, H.; Groisman, A.; Chen, Y.; Vella, A. T.; Hu, L.; Liang, B. T.; Fan, Z. Nexinhib20 inhibits neutrophil adhesion and  $\beta$ 2 integrin activation by antagonizing Rac-1-GTP Interaction. *J. Immunol.* **2022**, *209*, 1–12, 2022.
8. Segall, M. D. Multi-parameter optimization: identifying high quality compounds with a balance of properties. *Curr. Pharm. Des.* **2012**, *18*, 1292–1310.
9. [https://www.optibrium.com/downloads/MPO\\_Explorer\\_Profile\\_Builder.pdf](https://www.optibrium.com/downloads/MPO_Explorer_Profile_Builder.pdf) (accessed February 17, 2022)
